# Supplementary material for: DNA metabarcoding of zooplankton communities: species diversity and seasonal variation revealed by 18S rRNA and COI
Source: PeerJ. 2021 Mar 19;9:e11057. doi: 10.7717/peerj.11057 (PMC7983862; doi:10.7717/peerj.11057)
Supplement: Supplemental Information 3 [file peerj-09-11057-s003.xlsx]

## Sheet: Sheet1
ID	SUM_1	SUM_2	SUM_3	SUM_4	SUM_5	SUM_6	SUM_7	SUM_8	SUM_9	AUT_1	AUT_2	AUT_3	AUT_4	AUT_5	AUT_6	AUT_7	AUT_8	AUT_9	WIN_1	WIN_2	WIN_3	WIN_4	WIN_5	WIN_6	WIN_7	WIN_8	WIN_9	SPR_1	SPR_2	SPR_3	SPR_4	SPR_5	SPR_6	SPR_7	SPR_8	SPR_9	taxonomy
RE_18S_1	0	0	1	0	0	0	0	0	0	0	0	0	1	0	0	1	0	1	0	0	0	0	0	0	0	0	0	0	0	0	0	0	0	0	0	0	k__Eukaryota; p__unidentified
RE_18S_2	0	3	0	0	0	1	0	0	0	0	0	0	0	0	0	0	0	0	0	0	0	0	0	0	0	0	0	0	0	0	0	0	0	0	0	0	k__Eukaryota; p__unidentified
RE_18S_3	0	0	3	0	0	0	0	0	0	0	0	0	0	0	0	0	0	0	0	0	1	0	0	0	0	0	0	0	0	0	0	0	0	0	0	0	k__Eukaryota; p__unidentified
RE_18S_4	0	0	0	0	0	0	0	0	0	0	0	0	0	0	0	0	0	0	1	1	0	0	0	1	1	0	0	0	0	0	0	1	0	0	0	0	k__Eukaryota; p__unidentified
RE_18S_5	0	0	2	0	0	2	0	0	0	0	0	0	0	0	0	0	0	0	0	1	0	0	0	0	0	1	0	0	0	0	0	0	0	0	0	0	k__Eukaryota; p__unidentified
RE_18S_6	0	0	2	0	0	0	0	2	1	0	0	1	0	0	1	0	0	0	0	0	2	0	0	0	0	0	0	0	0	0	0	0	0	0	0	0	k__Eukaryota; p__unidentified
RE_18S_7	1	1	7	0	0	0	0	0	0	0	0	0	0	0	0	0	0	0	0	0	0	0	0	0	0	0	0	0	0	0	0	0	0	0	0	0	k__Eukaryota; p__unidentified
RE_18S_8	0	0	0	0	0	0	0	0	1	2	1	6	0	0	1	0	0	0	0	0	0	0	0	0	0	0	0	0	0	0	0	0	0	0	0	1	k__Eukaryota; p__unidentified
RE_18S_9	0	7	3	0	0	0	0	0	0	1	1	0	0	0	0	0	0	0	0	0	0	0	0	0	0	0	0	0	0	0	0	0	0	0	0	0	k__Eukaryota; p__unidentified
RE_18S_10	0	5	1	2	0	6	0	0	0	0	0	0	0	0	0	0	0	0	0	0	0	0	0	0	0	0	0	0	0	0	0	0	0	0	0	0	k__Eukaryota; p__unidentified
RE_18S_11	0	6	0	0	0	0	1	3	5	0	0	0	0	1	0	0	0	0	0	0	0	0	0	0	0	0	0	0	0	0	0	0	0	0	0	0	k__Eukaryota; p__unidentified
RE_18S_12	3	6	8	6	5	0	0	0	3	1	0	0	2	0	0	0	0	1	0	1	0	0	0	0	0	0	0	0	0	0	0	0	0	0	0	0	k__Eukaryota; p__unidentified
RE_18S_13	7	16	12	0	0	0	0	0	0	3	1	4	2	1	2	4	1	2	3	0	0	0	0	0	1	0	0	0	0	1	0	0	0	0	0	1	k__Eukaryota; p__unidentified
RE_18S_14	27	61	34	0	5	2	0	0	0	2	0	0	0	0	0	0	0	0	0	0	0	0	0	0	0	0	0	0	0	0	0	0	0	0	3	0	k__Eukaryota; p__unidentified
RE_18S_15	13	52	35	3	11	15	18	28	27	1	1	0	1	1	0	0	0	0	0	0	0	0	0	0	0	0	0	0	0	0	0	0	0	0	3	0	k__Eukaryota; p__unidentified
RE_18S_16	1031	2404	1779	0	70	112	2	15	19	236	331	162	433	576	433	830	965	673	317	94	64	181	7	42	20	1	3	0	1	0	0	2	0	0	82	42	k__Eukaryota; p__unidentified
RE_18S_17	0	45	25	0	26	57	0	29	48	590	1082	544	1080	1910	875	5786	3633	4449	3473	6687	214	1037	219	111	22	42	0	2	1	1	0	2	0	0	16	16	k__Eukaryota; p__unidentified
RE_18S_18	2	0	0	0	0	0	0	0	0	0	0	0	0	0	0	0	0	0	0	0	0	0	0	0	0	0	0	0	0	0	0	0	0	0	0	0	k__Metazoa
RE_18S_19	0	2	0	0	0	0	0	0	0	0	0	0	0	0	0	0	0	0	0	0	0	0	0	0	0	0	0	0	0	0	0	0	0	0	0	0	k__Metazoa
RE_18S_20	0	0	0	0	0	0	1	0	0	0	0	0	0	0	0	0	0	0	0	0	0	0	0	0	0	0	5	0	0	0	0	0	0	0	0	0	k__Metazoa
RE_18S_21	0	15	0	0	0	1	0	0	0	0	0	0	0	0	0	0	0	0	0	0	0	0	0	0	0	0	0	0	0	0	0	0	0	0	0	0	k__Metazoa
RE_18S_22	0	0	0	0	0	0	0	0	0	0	15	1	0	0	0	0	0	0	0	0	0	0	0	0	0	0	0	0	0	0	0	0	0	0	1	0	k__Metazoa
RE_18S_23	0	0	0	0	0	0	0	0	0	0	0	0	0	0	0	0	0	0	0	0	0	0	0	0	0	0	1	0	0	0	42	0	0	0	0	0	k__Metazoa
RE_18S_24	0	0	0	0	0	0	80	0	0	0	0	0	0	0	0	0	0	0	0	0	0	0	0	0	0	0	0	0	0	0	0	0	0	0	0	0	k__Metazoa
RE_18S_25	0	0	1	0	1	0	0	1	0	1	3	77	1	2	0	0	0	0	0	0	0	0	0	0	0	0	0	0	0	0	0	0	0	0	0	1	k__Metazoa
RE_18S_26	0	1	0	0	0	3	0	1	1	267	0	0	0	0	0	0	0	0	0	0	0	0	0	0	0	0	0	0	0	0	0	0	0	0	0	0	k__Metazoa
RE_18S_27	0	4	0	0	1	0	0	0	0	0	0	3	0	0	0	0	0	0	0	0	0	0	0	1	0	2	0	0	0	0	0	0	0	0	9	51	k__Metazoa; p__Annelida; c__Clitellata; o__Haplotaxida; f__Enchytraeidae; g__Enchytraeus
RE_18S_28	0	0	1	0	0	0	0	4	0	1	2	91	1	1	0	0	0	0	0	0	0	0	0	7	2	2	1	184	63	32	0	13	1	4	0	4	k__Metazoa; p__Annelida; c__Clitellata; o__Haplotaxida; f__Tubificidae; g__Uncinais; s__Uncinais_uncinata
RE_18S_29	0	0	0	0	0	0	0	0	0	0	0	0	0	0	0	1	1	0	0	0	0	0	0	0	0	0	0	1	3	1	0	0	0	0	0	0	k__Metazoa; p__Arthropoda
RE_18S_30	0	0	0	0	0	0	18	13	9	0	0	1	0	0	0	0	0	0	0	0	0	0	0	0	0	0	0	0	0	0	0	0	0	0	0	0	k__Metazoa; p__Arthropoda
RE_18S_31	15	62	51	0	1	2	0	0	0	5	3	5	3	2	0	2	0	0	0	0	0	0	0	0	0	0	0	1	0	0	0	0	0	0	5	0	k__Metazoa; p__Arthropoda
RE_18S_32	0	0	0	0	0	0	0	3	0	26	0	0	0	2	0	0	0	0	0	0	0	0	0	0	0	0	0	0	0	0	0	0	0	0	0	0	k__Metazoa; p__Arthropoda; c__Arachnida; o__Araneae; f__Linyphiidae; g__Erigone; s__Erigone_prominens
RE_18S_33	0	0	0	0	0	0	0	0	0	0	0	0	0	0	0	0	0	0	0	0	0	0	0	1	0	44	0	0	0	2	0	0	0	1	0	0	k__Metazoa; p__Arthropoda; c__Arachnida; o__Astigmata; f__Acaridae; g__Rhizoglyphus; s__Rhizoglyphus_sp._AP-2010
RE_18S_34	0	0	0	0	0	0	0	0	0	0	0	0	0	0	0	0	0	0	0	0	0	0	0	1	6	1	0	0	1	0	0	0	0	0	0	0	k__Metazoa; p__Arthropoda; c__Arachnida; o__Astigmata; f__Histiostomatidae; g__unidentified; s__Histiostomatidae_gen._sp._AD357
RE_18S_35	0	0	0	0	0	0	0	0	0	0	0	1	0	2	0	0	0	0	0	0	0	0	0	0	0	0	0	0	0	0	0	0	0	0	0	0	k__Metazoa; p__Arthropoda; c__Arachnida; o__Mesostigmata
RE_18S_36	0	0	0	0	0	0	0	1	0	0	1	25	0	0	0	0	0	0	0	0	0	0	0	0	0	0	0	0	0	0	0	0	0	0	0	0	k__Metazoa; p__Arthropoda; c__Arachnida; o__Mesostigmata
RE_18S_37	0	0	0	0	0	0	0	0	0	0	0	0	0	3	3	0	0	0	0	0	0	0	0	0	0	0	0	0	0	0	0	0	0	0	0	0	k__Metazoa; p__Arthropoda; c__Arachnida; o__Mesostigmata; f__Parasitidae
RE_18S_38	0	0	0	0	0	0	0	0	0	20	27	0	0	1	28	0	0	0	0	0	0	0	0	0	0	0	0	0	0	0	0	0	0	0	0	0	k__Metazoa; p__Arthropoda; c__Arachnida; o__Mesostigmata; f__Phytoseiidae; g__Amblyseius; s__Amblyseius_sp._ARP-2015
RE_18S_39	11	7	17	0	0	0	0	0	0	0	1	0	0	0	0	0	0	0	0	0	0	0	0	0	0	0	0	0	0	0	1	0	0	4	1	0	k__Metazoa; p__Arthropoda; c__Arachnida; o__Oribatida
RE_18S_40	0	0	0	0	0	0	0	0	1	12	0	0	0	0	34	0	0	0	0	0	0	3	0	0	0	0	0	3	0	0	0	0	0	0	0	0	k__Metazoa; p__Arthropoda; c__Arachnida; o__Oribatida
RE_18S_41	0	2	0	0	0	2	0	1	0	60	0	0	0	0	55	0	2	0	0	0	0	0	0	0	0	0	0	0	0	0	0	0	0	0	0	0	k__Metazoa; p__Arthropoda; c__Arachnida; o__Oribatida; f__Limnozetidae; g__Limnozetes; s__Limnozetes_rugosus
RE_18S_42	0	0	0	0	0	0	0	0	0	11	0	0	0	0	0	0	0	0	0	0	2	0	0	0	0	0	0	0	0	0	0	0	0	0	0	0	k__Metazoa; p__Arthropoda; c__Arachnida; o__Oribatida; f__Punctoribatidae; g__Paralamellobates; s__Paralamellobates_misella
RE_18S_43	0	0	0	0	0	0	0	1	0	2	0	0	2	0	0	0	0	0	0	0	0	0	0	0	0	0	0	0	0	0	0	0	0	0	0	0	k__Metazoa; p__Arthropoda; c__Arachnida; o__Oribatida; f__Scheloribatidae; g__Scheloribates; s__Scheloribates_pallidulus
RE_18S_44	13	30	15	0	1	0	0	1	2	4	8	5	3	2	14	0	0	0	0	0	0	0	0	0	0	0	0	5	0	0	0	0	0	0	1	1	k__Metazoa; p__Arthropoda; c__Arachnida; o__Trombidiformes
RE_18S_45	0	1	1	0	0	0	0	51	0	0	31	2587	16	32	1	0	0	0	0	0	0	0	0	0	0	0	0	0	0	0	0	0	0	1	0	76	k__Metazoa; p__Arthropoda; c__Arachnida; o__Trombidiformes
RE_18S_46	14	4	13	0	0	0	0	0	0	0	1	7	0	0	0	1	2	0	0	0	0	0	0	0	0	0	0	0	0	0	0	0	0	0	0	0	k__Metazoa; p__Arthropoda; c__Arachnida; o__Trombidiformes; f__Bdellidae; g__unidentified; s__Bdellidae_sp._ARP-2015
RE_18S_47	0	0	0	0	0	0	0	0	0	0	0	0	0	0	0	0	0	0	0	0	0	0	0	0	0	0	0	2	0	0	0	10	0	0	0	0	k__Metazoa; p__Arthropoda; c__Arachnida; o__Trombidiformes; f__Rhagidiidae; g__Rhagidia; s__Rhagidia_sp._AMUVe007
RE_18S_48	0	0	0	0	1	0	0	1	1	1	0	0	0	0	0	0	0	0	0	0	0	0	0	0	0	0	0	0	0	0	0	0	0	0	0	0	k__Metazoa; p__Arthropoda; c__Chilopoda; o__Lithobiomorpha; f__Henicopidae; g__Paralamyctes; s__Paralamyctes_environmental_sample
RE_18S_49	0	0	0	0	0	0	0	0	0	12	1	1	0	0	0	0	0	0	0	0	0	0	0	0	0	0	0	0	0	0	0	0	0	0	0	0	k__Metazoa; p__Arthropoda; c__Collembola; o__unidentified
RE_18S_50	0	0	0	0	0	0	0	0	0	9	0	2	0	11	13	0	0	0	0	0	0	0	0	0	0	0	0	0	0	0	0	0	0	0	0	0	k__Metazoa; p__Arthropoda; c__Collembola; o__unidentified
RE_18S_51	0	0	1	0	0	0	0	0	0	1	44	0	1	1	0	0	0	0	0	0	0	0	0	0	0	0	0	0	0	0	0	0	0	0	1	0	k__Metazoa; p__Arthropoda; c__Collembola; o__unidentified
RE_18S_52	0	1	0	0	0	1	0	0	0	1	1	1	2	34	9	0	0	0	0	0	0	0	0	0	0	0	0	0	0	0	0	0	0	0	0	0	k__Metazoa; p__Arthropoda; c__Collembola; o__unidentified
RE_18S_53	0	5	2	5	27	23	0	0	0	5	35	2	1	9	9	0	0	0	0	0	0	0	0	0	0	0	0	0	0	0	0	2	0	0	1	0	k__Metazoa; p__Arthropoda; c__Collembola; o__unidentified
RE_18S_54	0	0	4	0	0	0	0	0	1	0	54	52	2	3	12	0	0	0	0	0	0	0	0	0	37	0	0	0	1	0	0	0	0	0	3	0	k__Metazoa; p__Arthropoda; c__Collembola; o__unidentified
RE_18S_55	0	0	1	0	0	3	0	1	0	6	8	3	3	149	66	0	0	0	0	0	0	0	0	0	0	0	0	0	0	0	0	0	0	0	0	1	k__Metazoa; p__Arthropoda; c__Collembola; o__unidentified
RE_18S_56	0	0	0	0	0	0	0	0	0	0	0	0	0	0	0	0	0	0	3	267	3	3	0	0	0	0	0	0	0	0	0	0	0	0	0	0	k__Metazoa; p__Arthropoda; c__Collembola; o__unidentified
RE_18S_57	0	8	0	0	0	3	0	0	3	20	23	20	14	277	95	0	0	0	0	0	0	0	0	0	0	0	0	0	0	0	0	0	0	0	0	0	k__Metazoa; p__Arthropoda; c__Collembola; o__unidentified
RE_18S_58	0	216	25	0	20	272	0	26	31	1085	842	845	992	13220	5272	22	21	23	4	0	0	0	0	0	0	0	0	0	0	0	0	0	0	0	15	16	k__Metazoa; p__Arthropoda; c__Collembola; o__unidentified
RE_18S_59	0	0	0	0	0	0	0	1	0	10	17	43	1	60	75	0	0	0	0	0	0	0	0	0	0	0	0	0	0	0	0	0	0	0	0	1	k__Metazoa; p__Arthropoda; c__Collembola; o__unidentified; f__Entomobryidae
RE_18S_60	0	0	0	0	0	0	0	0	0	0	0	0	0	0	0	0	0	0	0	0	0	4	0	0	0	0	0	0	0	0	0	0	0	0	0	0	k__Metazoa; p__Arthropoda; c__Collembola; o__unidentified; f__Isotomidae
RE_18S_61	17	60	1	0	0	1	0	2	0	0	0	27	0	0	6	0	0	0	0	0	0	0	0	0	0	0	0	1	0	0	0	0	0	0	2	143	k__Metazoa; p__Arthropoda; c__Collembola; o__unidentified; f__Isotomidae; g__Folsomides; s__Folsomides_parvulus
RE_18S_62	0	0	0	0	0	1	0	0	0	21	0	29	10	6	68	0	1	7	0	0	82	0	0	0	0	0	0	0	0	0	0	0	0	0	0	0	k__Metazoa; p__Arthropoda; c__Collembola; o__unidentified; f__Isotomidae; g__Isotomurus; s__Isotomurus_palustris
RE_18S_63	0	1	0	0	1	0	0	0	0	0	1	0	2	0	0	0	0	0	0	0	29	4	0	1	3	5	0	0	0	0	0	0	0	0	0	0	k__Metazoa; p__Arthropoda; c__Insecta
RE_18S_64	0	0	0	0	0	0	0	0	0	0	0	0	0	0	0	0	1	0	224	55	42003	126	3	0	0	0	0	0	0	0	0	0	0	0	0	0	k__Metazoa; p__Arthropoda; c__Insecta; o__Coleoptera; f__Chrysomelidae
RE_18S_65	0	0	0	0	0	0	0	2	0	0	0	82	0	2	0	0	0	0	0	0	0	0	0	0	0	0	0	0	0	0	0	0	0	0	0	1	k__Metazoa; p__Arthropoda; c__Insecta; o__Coleoptera; f__Latridiidae
RE_18S_66	0	0	0	0	0	0	0	0	0	0	0	0	0	0	32	0	0	0	0	0	0	0	0	0	0	0	0	0	0	0	0	0	0	0	0	0	k__Metazoa; p__Arthropoda; c__Insecta; o__Coleoptera; f__Latridiidae; g__Cortinicara; s__Cortinicara_sp._NPL-2007
RE_18S_67	0	0	0	0	0	0	0	0	0	0	0	0	0	0	0	0	0	0	0	0	0	0	0	1	0	0	0	25	0	0	0	1	0	0	0	0	k__Metazoa; p__Arthropoda; c__Insecta; o__Coleoptera; f__Staphylinidae; g__Atheta; s__Atheta_volans
RE_18S_68	0	0	0	0	0	0	0	0	0	0	0	0	0	12	0	0	0	0	0	0	0	0	0	0	0	0	0	0	0	0	0	0	0	0	0	0	k__Metazoa; p__Arthropoda; c__Insecta; o__Coleoptera; f__Staphylinidae; g__Carpelimus; s__Carpelimus_similis
RE_18S_69	0	0	0	0	0	0	0	0	0	1	0	0	0	14	0	0	0	0	0	0	0	0	0	0	0	0	0	0	0	0	0	0	0	0	0	0	k__Metazoa; p__Arthropoda; c__Insecta; o__Coleoptera; f__Staphylinidae; g__Carpelimus; s__Carpelimus_similis
RE_18S_70	0	0	0	0	0	1	0	0	0	0	0	0	0	19	0	0	0	0	0	0	0	0	0	0	0	0	0	0	0	0	0	0	0	0	0	0	k__Metazoa; p__Arthropoda; c__Insecta; o__Coleoptera; f__Staphylinidae; g__Carpelimus; s__Carpelimus_similis
RE_18S_71	0	65	0	0	0	76	0	1	0	55	23	17	22	3128	16	0	0	0	0	0	0	0	0	0	0	0	0	0	0	0	0	0	0	0	1	0	k__Metazoa; p__Arthropoda; c__Insecta; o__Coleoptera; f__Staphylinidae; g__Carpelimus; s__Carpelimus_similis
RE_18S_72	0	0	0	0	0	0	0	1	0	20	0	1	0	0	1	0	0	0	0	0	0	0	0	0	0	0	0	0	0	0	0	0	0	0	0	0	k__Metazoa; p__Arthropoda; c__Insecta; o__Coleoptera; f__Staphylinidae; g__Stenus
RE_18S_73	0	0	0	0	0	0	0	0	0	0	0	0	0	0	0	0	23	0	0	0	0	0	0	0	0	0	0	0	0	0	0	0	0	0	0	0	k__Metazoa; p__Arthropoda; c__Insecta; o__Diptera
RE_18S_74	0	0	0	0	0	0	0	0	0	0	0	0	0	0	0	0	0	0	0	0	0	0	0	0	0	0	0	5	0	0	0	0	0	0	0	0	k__Metazoa; p__Arthropoda; c__Insecta; o__Diptera; f__Ceratopogonidae; g__Culicoides; s__Culicoides_variipennis
RE_18S_75	0	0	0	0	0	0	7	10	8	0	0	0	0	0	1	0	0	0	0	0	0	0	0	0	0	0	0	0	0	0	0	0	0	0	0	0	k__Metazoa; p__Arthropoda; c__Insecta; o__Diptera; f__Ceratopogonidae; g__Culicoides; s__Culicoides_variipennis
RE_18S_76	0	0	0	0	0	0	0	0	0	0	0	0	0	0	0	0	0	0	0	0	0	0	0	0	0	0	3	0	0	0	48	2	0	0	0	0	k__Metazoa; p__Arthropoda; c__Insecta; o__Diptera; f__Ceratopogonidae; g__Culicoides; s__Culicoides_variipennis
RE_18S_77	0	1	0	0	0	0	0	0	0	0	0	1	0	22	11	0	0	0	0	0	0	0	0	0	0	0	0	0	0	0	0	0	0	0	0	0	k__Metazoa; p__Arthropoda; c__Insecta; o__Diptera; f__Chironomidae
RE_18S_78	0	0	0	0	0	0	0	0	0	0	0	1	11	1	6	0	0	0	0	0	0	0	0	0	0	0	135	4	2	2	0	0	0	0	7	0	k__Metazoa; p__Arthropoda; c__Insecta; o__Diptera; f__Chironomidae
RE_18S_79	0	0	0	0	0	0	0	0	0	0	0	0	0	0	0	1	0	65	0	0	0	0	0	3	89	2	55	0	2	1	2	0	5	0	0	2	k__Metazoa; p__Arthropoda; c__Insecta; o__Diptera; f__Chironomidae
RE_18S_80	0	0	0	0	0	0	0	0	0	0	0	0	0	0	0	0	0	0	19	3	0	161	770	0	0	0	0	0	0	0	0	0	0	0	0	0	k__Metazoa; p__Arthropoda; c__Insecta; o__Diptera; f__Chironomidae
RE_18S_81	0	0	0	0	0	0	0	0	0	0	0	0	0	0	0	0	6	4	0	0	0	0	0	0	0	0	0	0	0	0	0	0	0	0	0	0	k__Metazoa; p__Arthropoda; c__Insecta; o__Diptera; f__Chironomidae; g__Ablabesmyia; s__Ablabesmyia_rhamphe
RE_18S_82	0	0	0	0	0	0	2	4	2	0	0	0	0	0	0	0	0	0	0	0	0	0	0	1	0	0	0	43	8	0	0	0	0	0	0	0	k__Metazoa; p__Arthropoda; c__Insecta; o__Diptera; f__Chironomidae; g__Ablabesmyia; s__Ablabesmyia_rhamphe
RE_18S_83	0	0	0	0	0	0	0	0	0	0	0	0	0	0	0	52	0	0	0	0	0	0	0	9	0	1	1	75	11	17	15	52	1	0	0	16	k__Metazoa; p__Arthropoda; c__Insecta; o__Diptera; f__Chironomidae; g__Acricotopus; s__Acricotopus_lucens
RE_18S_84	0	1	0	0	0	0	0	1	0	0	0	1	0	0	0	0	0	0	0	0	0	0	0	2	1	0	0	1	13	1	1	21	1	23	2	226	k__Metazoa; p__Arthropoda; c__Insecta; o__Diptera; f__Chironomidae; g__Acricotopus; s__Acricotopus_lucens
RE_18S_85	0	0	0	0	1	0	10	25	36	0	0	0	0	0	0	0	0	0	0	3	0	60	44	363	3	48	0	8	0	1	0	4	0	1	0	0	k__Metazoa; p__Arthropoda; c__Insecta; o__Diptera; f__Chironomidae; g__Acricotopus; s__Acricotopus_lucens
RE_18S_86	0	0	1	0	1	0	50	43	54	1	0	0	0	0	7	128	0	0	33	24	1	70	0	43	17	22	19	8	7	3	7	52	3	1	20	10	k__Metazoa; p__Arthropoda; c__Insecta; o__Diptera; f__Chironomidae; g__Acricotopus; s__Acricotopus_lucens
RE_18S_87	0	0	0	0	0	0	0	0	0	0	0	0	0	0	0	0	0	0	0	0	0	0	0	0	0	0	0	0	0	0	0	0	0	7	0	0	k__Metazoa; p__Arthropoda; c__Insecta; o__Diptera; f__Chironomidae; g__Chironomus; s__Chironomus_tepperi
RE_18S_88	2	4	0	0	0	0	0	0	0	0	0	0	0	0	0	0	0	0	0	0	0	0	0	0	0	0	0	0	0	0	0	0	0	0	0	1	k__Metazoa; p__Arthropoda; c__Insecta; o__Diptera; f__Chironomidae; g__Chironomus; s__Chironomus_tepperi
RE_18S_89	0	0	0	0	0	0	0	1	0	0	0	0	0	0	3	2	0	0	0	0	0	0	0	0	0	0	0	0	0	0	0	0	0	0	0	15	k__Metazoa; p__Arthropoda; c__Insecta; o__Diptera; f__Chironomidae; g__Chironomus; s__Chironomus_tepperi
RE_18S_90	0	0	0	22	4	9	0	0	0	0	0	0	0	0	0	0	0	0	0	0	0	0	0	0	0	0	0	0	0	0	0	0	0	0	0	0	k__Metazoa; p__Arthropoda; c__Insecta; o__Diptera; f__Chironomidae; g__Chironomus; s__Chironomus_tepperi
RE_18S_91	0	2	0	23	4	7	3	2	4	0	0	0	0	0	0	0	0	0	0	0	0	0	0	0	0	0	0	0	0	0	0	0	0	0	0	0	k__Metazoa; p__Arthropoda; c__Insecta; o__Diptera; f__Chironomidae; g__Chironomus; s__Chironomus_tepperi
RE_18S_92	7	30	14	0	0	0	0	0	0	0	0	0	0	0	0	0	0	0	0	0	0	0	0	0	0	0	0	0	0	0	0	0	0	0	0	0	k__Metazoa; p__Arthropoda; c__Insecta; o__Diptera; f__Chironomidae; g__Chironomus; s__Chironomus_tepperi
RE_18S_93	0	0	0	0	0	0	0	0	0	0	0	0	0	0	0	0	0	0	0	0	0	0	0	9	0	46	3	180	1	1	0	2	0	1	0	0	k__Metazoa; p__Arthropoda; c__Insecta; o__Diptera; f__Chironomidae; g__Chironomus; s__Chironomus_tepperi
RE_18S_94	14	56	50	0	0	0	0	0	0	0	0	0	0	0	0	0	0	0	0	0	0	0	0	48	1	1	8	785	6	7	1	7	0	11	2	5	k__Metazoa; p__Arthropoda; c__Insecta; o__Diptera; f__Chironomidae; g__Chironomus; s__Chironomus_tepperi
RE_18S_95	0	3	0	0	0	0	23	56	42	0	0	3	16	0	3	52	100	41	0	0	1	0	0	75	1880	1182	89	3	36	33	0	1	29	53	198	1092	k__Metazoa; p__Arthropoda; c__Insecta; o__Diptera; f__Chironomidae; g__Chironomus; s__Chironomus_tepperi
RE_18S_96	0	0	0	0	0	0	0	0	0	0	0	0	0	0	0	0	0	0	0	0	0	0	1	0	0	0	1	0	0	0	0	0	0	0	0	0	k__Metazoa; p__Arthropoda; c__Insecta; o__Diptera; f__Chironomidae; g__Clunio; s__Clunio_marinus
RE_18S_97	0	0	0	0	0	0	11	13	16	1	0	0	0	0	0	0	0	0	0	0	0	0	0	2	1	54	0	0	0	6	1	1	0	3	0	0	k__Metazoa; p__Arthropoda; c__Insecta; o__Diptera; f__Chironomidae; g__Clunio; s__Clunio_marinus
RE_18S_98	0	0	0	0	0	0	0	0	0	0	0	0	0	0	0	0	0	0	0	0	0	0	0	32	148	2	0	1	2	0	0	2	2	0	0	0	k__Metazoa; p__Arthropoda; c__Insecta; o__Diptera; f__Chironomidae; g__Clunio; s__Clunio_marinus
RE_18S_99	0	2	1	0	0	0	0	2	0	0	0	4	0	0	0	0	0	0	0	0	0	0	0	1	4	0	0	0	0	0	0	0	0	0	0	494	k__Metazoa; p__Arthropoda; c__Insecta; o__Diptera; f__Chironomidae; g__Clunio; s__Clunio_marinus
RE_18S_100	0	3	0	0	0	0	20	17	11	2	0	10	31	0	2	6	0	334	0	4	0	1	0	10	76	49	19	7	3	2	10	3	4	3	34	1312	k__Metazoa; p__Arthropoda; c__Insecta; o__Diptera; f__Chironomidae; g__Clunio; s__Clunio_marinus
RE_18S_101	0	45	4	320	148	124	0	25	3	89	159	102	71	35	259	2467	67	387	3174	13193	405	1030	215	6414	319	2298	5620	4023	1034	723	2776	5929	1177	531	443	5519	k__Metazoa; p__Arthropoda; c__Insecta; o__Diptera; f__Chironomidae; g__Clunio; s__Clunio_marinus
RE_18S_102	0	1	0	0	0	0	0	1	0	0	0	3	0	0	0	0	0	0	0	0	0	0	0	0	0	0	0	0	0	0	0	0	0	0	0	219	k__Metazoa; p__Arthropoda; c__Insecta; o__Diptera; f__Chloropidae; g__Thaumatomyia; s__Thaumatomyia_notata
RE_18S_103	0	4	0	0	0	8	0	1	3	567	0	0	0	0	0	0	0	0	0	0	0	0	0	0	0	0	0	0	0	0	0	0	0	0	0	0	k__Metazoa; p__Arthropoda; c__Insecta; o__Diptera; f__Culicidae; g__Anopheles; s__Anopheles_plumbeus
RE_18S_104	0	0	0	0	0	0	0	0	0	0	0	12	0	84	1	0	0	0	0	1	234	0	0	0	0	0	0	0	0	0	0	0	0	0	0	0	k__Metazoa; p__Arthropoda; c__Insecta; o__Diptera; f__Sciaridae; g__Bradysia; s__Bradysia_tilicola
RE_18S_105	0	0	0	0	0	0	0	0	0	0	0	0	0	0	11	0	0	0	0	0	0	0	0	0	0	0	0	0	0	0	0	0	0	0	0	0	k__Metazoa; p__Arthropoda; c__Insecta; o__Diptera; f__Tephritidae; g__Anastrepha; s__Anastrepha_ludens
RE_18S_106	0	2	110	0	1	0	0	1	1	1	3400	30	23	44	0	0	0	0	0	0	0	0	0	25	1	6	0	34	3	359	6	1152	2	20	100	0	k__Metazoa; p__Arthropoda; c__Insecta; o__Hemiptera
RE_18S_107	0	0	0	0	0	0	0	0	0	0	0	0	0	0	3	0	0	0	0	0	0	0	0	0	0	0	0	0	0	0	0	0	0	0	0	0	k__Metazoa; p__Arthropoda; c__Insecta; o__Hymenoptera
RE_18S_108	0	0	0	0	0	0	4	6	7	0	0	0	0	0	0	0	0	0	0	0	0	0	0	0	0	0	0	0	0	0	0	0	0	0	0	1	k__Metazoa; p__Arthropoda; c__Insecta; o__Thysanoptera; f__Thripidae; g__Dendrothrips; s__Dendrothrips_sp._TH63
RE_18S_109	0	0	0	0	0	0	18	26	18	3	0	1	0	0	0	0	0	0	0	0	0	0	0	0	0	0	0	0	0	0	0	0	0	0	0	0	k__Metazoa; p__Arthropoda; c__Insecta; o__Trichoptera
RE_18S_110	0	0	0	0	0	1	0	0	0	1	0	1	0	30	2	0	0	0	0	0	0	0	0	0	0	0	0	0	0	0	0	0	0	0	0	0	k__Metazoa; p__Arthropoda; c__Ostracoda; o__Podocopida
RE_18S_111	319	1235	1052	95	743	1631	1185	2452	2724	51914	41498	47692	38266	41063	30781	6585	3195	3924	9579	70	2521	88	6906	198	89	123	1906	8697	3564	8267	5341	674	182	856	566	1103	k__Metazoa; p__Arthropoda; c__Ostracoda; o__Podocopida
RE_18S_112	0	0	1	6	23	49	12	6	9	3	10	3	6	2	19	0	0	0	1	0	0	0	0	0	0	0	0	0	0	0	1	0	0	0	0	0	k__Metazoa; p__Arthropoda; c__Ostracoda; o__Podocopida; f__Cyprididae; g__Cypridopsis; s__Cypridopsis_japonica
RE_18S_113	0	0	0	0	0	1	0	0	0	21	32	0	2	5	84	3	1686	5	0	0	1	0	0	0	0	0	4	0	0	0	0	0	0	0	2	0	k__Metazoa; p__Arthropoda; c__Ostracoda; o__Podocopida; f__Cyprididae; g__Heterocypris
RE_18S_114	0	2	1	0	0	2	0	2	1	44	15	7	16	105	131	1	2	1	0	0	1	0	0	0	0	0	0	0	0	0	0	0	0	0	0	0	k__Metazoa; p__Arthropoda; c__Ostracoda; o__Podocopida; f__Cyprididae; g__Stenocypris; s__Stenocypris_major
RE_18S_115	0	0	4	6	24	31	0	0	7	67	21	27	43	15	61	0	37	1	0	0	0	0	0	0	0	0	1	0	1	0	9	7	0	0	0	1	k__Metazoa; p__Arthropoda; c__Ostracoda; o__Podocopida; f__Ilyocyprididae; g__Ilyocypris; s__Ilyocypris_japonica
RE_18S_116	0	1	0	214	226	403	0	0	0	1	0	0	2	2	0	0	0	0	0	0	0	0	0	0	0	0	0	0	0	0	0	0	0	0	0	0	k__Metazoa; p__Bryozoa; c__Gymnolaemata; o__Ctenostomatida
RE_18S_117	4	0	1	0	0	0	0	0	2	0	0	0	0	0	0	0	0	0	0	0	0	0	0	0	0	0	0	0	0	0	0	0	0	0	0	0	k__Metazoa; p__Bryozoa; c__Phylactolaemata; o__unidentified
RE_18S_118	0	0	0	2	0	2	0	0	1	0	0	0	0	0	0	0	0	0	0	0	0	0	0	0	0	0	0	0	0	0	0	0	0	0	0	1	k__Metazoa; p__Bryozoa; c__Phylactolaemata; o__unidentified; f__Cristatellidae; g__Cristatella; s__Cristatella_mucedo
RE_18S_119	4282	9868	8088	14111	25642	25016	8828	6765	10508	1269	447	414	1244	1023	228	1883	1149	1548	88	57	310	54	20	12	283	188	216	28	20	30	74	79	109	73	441	305	k__Metazoa; p__Bryozoa; c__Phylactolaemata; o__unidentified; f__Cristatellidae; g__Cristatella; s__Cristatella_mucedo
RE_18S_120	0	0	0	0	0	6	0	0	0	0	0	0	0	0	0	0	0	0	0	0	0	0	0	0	0	0	0	0	0	0	0	0	0	0	0	0	k__Metazoa; p__Chordata
RE_18S_121	0	1	0	2	9	15	0	0	1	0	0	0	1	0	0	0	0	0	0	0	0	0	0	0	0	0	0	0	0	0	0	0	0	0	0	0	k__Metazoa; p__Chordata; c__Actinopteri
RE_18S_122	0	1	0	0	0	0	0	0	0	0	0	0	0	0	0	0	1	0	0	0	12	0	0	0	1	0	0	0	0	0	0	0	0	6	1	4	k__Metazoa; p__Chordata; c__Aves; o__Galliformes; f__Phasianidae; g__Gallus; s__Gallus_gallus
RE_18S_123	7	20	7	1	5	20	0	1	0	1	0	0	1	1	0	1	0	2	0	1	0	2	0	4	0	2	0	0	0	0	0	0	0	0	1	3	k__Metazoa; p__Chordata; c__Mammalia; o__Perissodactyla; f__Equidae; g__Equus; s__Equus_caballus
RE_18S_124	0	0	0	0	7	0	539	173	241	5	0	4	3	0	0	0	2	2	0	0	0	0	0	0	0	0	0	0	0	0	0	0	0	0	0	0	k__Metazoa; p__Cnidaria; c__Hydrozoa; o__Anthoathecata
RE_18S_125	0	0	0	0	0	0	0	0	0	0	0	0	0	0	1	20	0	7	0	0	0	0	0	0	0	0	0	0	0	0	0	0	0	0	0	0	k__Metazoa; p__Cnidaria; c__Hydrozoa; o__Limnomedusae; f__Olindiidae; g__Craspedacusta; s__Craspedacusta_sowerbyi
RE_18S_126	0	0	0	3	0	0	0	0	0	0	0	1	0	0	0	0	0	0	0	0	0	0	0	0	0	0	2	0	0	0	0	0	0	0	0	0	k__Metazoa; p__Gastrotricha; c__unidentified; o__Chaetonotida
RE_18S_127	47	108	90	0	3	1	0	0	0	0	0	0	0	0	0	0	0	0	0	0	0	0	0	0	0	0	0	0	0	0	0	0	0	0	5	1	k__Metazoa; p__Gastrotricha; c__unidentified; o__Chaetonotida
RE_18S_128	0	0	0	0	0	0	0	0	0	0	0	0	0	0	0	0	0	0	2	0	0	0	0	0	0	0	0	0	0	0	0	0	0	0	0	0	k__Metazoa; p__Gastrotricha; c__unidentified; o__Chaetonotida; f__Chaetonotidae
RE_18S_129	0	0	0	0	0	0	2	2	0	0	0	0	0	0	0	0	0	0	0	0	0	0	0	0	0	0	0	0	0	0	0	0	0	0	0	0	k__Metazoa; p__Gastrotricha; c__unidentified; o__Chaetonotida; f__Chaetonotidae
RE_18S_130	0	1	1	7	7	9	0	0	0	0	0	0	0	0	0	0	0	0	0	0	0	0	0	0	0	0	0	0	0	0	0	0	0	0	0	0	k__Metazoa; p__Gastrotricha; c__unidentified; o__Chaetonotida; f__Chaetonotidae
RE_18S_131	3	2	13	2	0	16	0	0	0	0	0	0	0	0	0	0	0	0	0	0	0	0	0	0	0	0	0	0	0	0	0	0	0	0	0	1	k__Metazoa; p__Gastrotricha; c__unidentified; o__Chaetonotida; f__Chaetonotidae
RE_18S_132	11	31	26	8	14	3	0	0	0	0	0	0	0	0	0	0	0	0	0	0	0	0	0	0	0	0	0	0	0	0	0	0	0	0	1	1	k__Metazoa; p__Gastrotricha; c__unidentified; o__Chaetonotida; f__Chaetonotidae
RE_18S_133	0	6	3	2	8	6	151	130	149	4	0	0	0	0	0	0	0	0	0	0	0	0	0	0	0	0	0	0	0	0	0	0	0	0	0	0	k__Metazoa; p__Gastrotricha; c__unidentified; o__Chaetonotida; f__Chaetonotidae
RE_18S_134	14	48	32	60	33	44	82	64	103	6	0	1	0	1	0	0	0	0	1	0	14	0	0	0	0	0	0	0	0	0	0	2	0	0	2	0	k__Metazoa; p__Gastrotricha; c__unidentified; o__Chaetonotida; f__Chaetonotidae
RE_18S_135	0	0	0	1	1	0	0	0	0	0	0	0	0	0	0	0	0	0	0	0	0	0	0	3	0	0	0	0	1	0	0	8	0	0	0	0	k__Metazoa; p__Gastrotricha; c__unidentified; o__Chaetonotida; f__Chaetonotidae; g__Heterolepidoderma
RE_18S_136	4	12	11	47	20	58	3	2	1	0	0	0	1	0	0	0	0	0	0	0	0	0	0	0	0	0	0	0	0	0	0	0	0	0	0	0	k__Metazoa; p__Gastrotricha; c__unidentified; o__Chaetonotida; f__Chaetonotidae; g__Heterolepidoderma; s__Heterolepidoderma_sp._1_TK-2012
RE_18S_137	6	9	0	0	2	6	0	0	0	0	0	0	0	0	0	0	0	0	0	0	0	0	0	0	0	0	0	0	0	0	0	0	0	0	0	0	k__Metazoa; p__Mollusca; c__Gastropoda; o__unidentified
RE_18S_138	8	12	10	0	0	0	0	0	0	0	0	0	0	1	0	0	0	0	0	0	0	0	0	0	0	0	0	0	0	1	0	0	0	0	1	0	k__Metazoa; p__Mollusca; c__Gastropoda; o__unidentified; f__Planorbidae
RE_18S_139	0	0	0	0	0	0	0	0	0	0	0	0	0	0	0	0	0	0	0	1	0	1	0	0	0	0	0	2	1	0	1	0	0	0	0	2	k__Metazoa; p__Nematoda
RE_18S_140	0	8	0	0	0	0	10	22	8	12	5	7	0	1	4	0	2	25	147	3984	7	38	4	128	32	85	36	441	68	13	174	546	27	47	96	1069	k__Metazoa; p__Nematoda
RE_18S_141	0	0	0	0	0	0	0	0	0	0	0	0	0	0	0	0	0	0	0	0	0	0	0	0	0	8	0	0	0	0	0	0	0	0	0	0	k__Metazoa; p__Nematoda; c__Chromadorea; o__Araeolaimida; f__Rhabdolaimidae; g__Rhabdolaimus; s__Rhabdolaimus_aquaticus
RE_18S_142	0	0	0	0	0	0	0	0	0	0	0	0	0	0	0	0	0	0	0	0	8	0	0	0	0	0	0	0	0	0	0	0	0	0	0	0	k__Metazoa; p__Nematoda; c__Chromadorea; o__Diplogasterida; f__Neodiplogasteridae; g__Pristionchus
RE_18S_143	0	0	0	0	0	0	2	3	0	0	0	0	0	0	0	0	0	0	0	0	0	0	0	0	0	0	0	0	0	0	0	0	0	0	0	0	k__Metazoa; p__Nematoda; c__Chromadorea; o__Monhysterida; f__Monhysteridae
RE_18S_144	0	0	0	0	0	6	0	0	0	0	0	0	0	0	0	0	0	0	0	0	0	0	0	0	0	0	0	0	0	0	0	0	0	0	0	0	k__Metazoa; p__Nematoda; c__Chromadorea; o__Monhysterida; f__Monhysteridae
RE_18S_145	2	0	2	6	6	7	2	1	0	0	0	0	0	0	0	0	0	0	0	0	0	0	0	0	0	0	0	0	0	0	0	0	0	0	0	0	k__Metazoa; p__Nematoda; c__Chromadorea; o__Monhysterida; f__Monhysteridae
RE_18S_146	1	1	1	9	4	16	20	14	13	1	0	0	0	0	0	0	0	0	0	0	0	0	0	0	0	0	0	0	0	0	0	0	0	0	0	0	k__Metazoa; p__Nematoda; c__Chromadorea; o__Monhysterida; f__Monhysteridae
RE_18S_147	1	14	5	5	16	30	17	11	15	0	0	0	0	0	0	0	0	0	0	0	0	0	0	0	0	0	0	0	0	0	0	0	0	0	0	0	k__Metazoa; p__Nematoda; c__Chromadorea; o__Monhysterida; f__Monhysteridae
RE_18S_148	5	26	32	35	31	49	58	47	57	2	0	0	1	0	0	0	0	0	0	0	0	0	0	0	1	0	0	0	0	0	0	0	0	0	0	0	k__Metazoa; p__Nematoda; c__Chromadorea; o__Monhysterida; f__Monhysteridae
RE_18S_149	0	6	4	0	0	0	0	0	0	0	0	0	0	0	0	0	0	0	0	0	0	0	0	0	0	0	0	0	0	0	0	0	0	0	0	0	k__Metazoa; p__Nematoda; c__Chromadorea; o__Monhysterida; f__Monhysteridae; g__Eumonhystera; s__Eumonhystera_filiformis
RE_18S_150	0	0	0	0	0	0	3	5	4	1	0	1	0	0	0	0	0	0	0	2	1	1	0	8	10	48	85	1	0	2	0	0	0	0	0	6	k__Metazoa; p__Nematoda; c__Chromadorea; o__Plectida; f__Plectidae; g__Plectus; s__Plectus_minimus
RE_18S_151	1	3	2	0	0	0	0	0	0	0	0	0	0	0	0	0	0	0	0	0	0	0	0	0	0	0	1	0	0	0	0	0	0	0	0	0	k__Metazoa; p__Nematoda; c__Chromadorea; o__Rhabditida; f__Cephalobidae; g__Acrobeloides; s__Acrobeloides_thornei
RE_18S_152	0	0	0	0	0	0	0	0	0	0	0	0	0	0	0	0	0	0	5	0	0	0	0	0	0	0	0	0	0	0	0	0	0	0	0	0	k__Metazoa; p__Nematoda; c__Chromadorea; o__Rhabditida; f__Diplogastridae; g__Acrostichus
RE_18S_153	0	0	0	0	0	0	0	0	0	0	0	0	0	0	0	0	0	0	979	22	3	1	2	0	0	0	0	0	0	0	0	0	0	0	1	0	k__Metazoa; p__Nematoda; c__Chromadorea; o__Rhabditida; f__Diplogastridae; g__Acrostichus
RE_18S_154	0	0	0	0	0	0	0	0	0	0	0	0	0	0	0	0	0	0	142	1	1	0	0	0	0	0	0	0	0	0	0	0	0	0	0	0	k__Metazoa; p__Nematoda; c__Chromadorea; o__Rhabditida; f__Diplogastridae; g__Acrostichus; s__Acrostichus_sp._RGD193
RE_18S_155	0	0	0	0	0	0	0	0	0	0	0	0	0	0	0	0	0	0	0	0	0	0	0	3	1	29	18	0	0	1	0	0	0	0	0	0	k__Metazoa; p__Nematoda; c__Chromadorea; o__Rhabditida; f__Rhabditidae; g__Oscheius; s__Oscheius_tipulae
RE_18S_156	3	36	15	0	4	3	0	0	0	0	0	0	0	0	0	0	0	0	0	0	0	0	0	0	0	0	0	0	0	0	0	0	0	0	0	1	k__Metazoa; p__Nematoda; c__Chromadorea; o__Rhabditida; f__Rhabditidae; g__Pellioditis; s__Pellioditis_marina
RE_18S_157	0	0	0	0	0	0	0	1	0	4	8	17	0	0	0	0	0	0	0	0	0	0	0	0	0	0	0	0	0	0	0	0	0	0	0	0	k__Metazoa; p__Nematoda; c__Chromadorea; o__Rhabditida; f__unidentified; g__Auanema; s__Auanema_rhodensis
RE_18S_158	0	0	0	0	0	0	0	0	0	0	0	0	0	0	0	0	0	0	0	0	0	0	1	0	0	6	49	0	0	0	0	0	0	0	0	0	k__Metazoa; p__Nematoda; c__Chromadorea; o__Tylenchida; f__Anguinidae; g__Ditylenchus; s__Ditylenchus_sp._4_JH-2014
RE_18S_159	0	0	0	0	0	0	0	0	0	0	0	0	0	0	0	0	0	0	0	0	1	0	0	0	0	0	6	0	0	0	0	0	0	0	0	0	k__Metazoa; p__Nematoda; c__Chromadorea; o__Tylenchida; f__Aphelenchoididae; g__Aphelenchoides
RE_18S_160	0	0	0	0	0	0	0	1	1	0	0	0	0	0	0	0	0	0	0	0	0	0	0	0	0	0	0	0	0	0	0	0	0	0	0	0	k__Metazoa; p__Nematoda; c__Chromadorea; o__Tylenchida; f__Pratylenchidae; g__Pratylenchus; s__Pratylenchus_scribneri
RE_18S_161	4	10	8	0	241	5	7358	6307	8908	89	6	111	144	5	24	0	0	2	0	2	0	0	0	1	0	0	2	4	1	1	12	6	0	1	20	187	k__Metazoa; p__Nematoda; c__Enoplea; o__Dorylaimida
RE_18S_162	0	0	0	0	0	0	7	5	8	1	0	0	0	0	0	0	0	0	0	0	0	2	0	0	0	0	0	0	0	0	0	0	0	0	0	0	k__Metazoa; p__Nematoda; c__Enoplea; o__Dorylaimida; f__Qudsianematidae
RE_18S_163	0	0	1	3	5	2	283	208	288	6	0	1	3	0	0	0	0	0	0	0	26	0	0	33	0	0	0	1	0	0	0	1	0	0	0	0	k__Metazoa; p__Nematoda; c__Enoplea; o__Mononchida; f__Mononchidae; g__Mononchus; s__Mononchus_truncatus
RE_18S_164	1	0	0	3	10	0	45	20	37	0	0	0	0	1	1	0	0	0	17	27	21	1	0	0	0	0	2	1	0	1	10	23	1	0	0	1	k__Metazoa; p__Nematoda; c__Enoplea; o__Triplonchida; f__Tobrilidae
RE_18S_165	0	0	0	0	0	0	0	0	0	0	0	0	0	0	0	0	4	0	0	0	0	0	0	0	0	0	0	0	0	0	0	0	0	0	0	0	k__Metazoa; p__Platyhelminthes; c__Catenulida; o__unidentified; f__Stenostomidae; g__Stenostomum; s__Stenostomum_simplex
RE_18S_166	0	4	0	0	0	11	0	0	2	432	4	0	1	5	0	0	0	0	0	0	0	0	0	0	0	0	0	0	0	0	0	0	0	0	0	0	k__Metazoa; p__Platyhelminthes; c__Rhabditophora; o__Rhabdocoela; f__Dalyelliidae; g__Dalyellia; s__Dalyellia_tatrica
RE_18S_167	0	0	0	0	0	0	0	0	0	0	0	0	0	0	0	0	0	0	1	0	1	122	0	0	0	0	0	0	0	0	0	0	0	0	0	0	k__Metazoa; p__Platyhelminthes; c__Rhabditophora; o__Rhabdocoela; f__Dalyelliidae; g__Gieysztoria; s__Gieysztoria_cuspidata
RE_18S_168	24	172	60	903	752	1613	0	2	22	77	1	20	10	19	0	0	0	0	0	0	0	0	0	0	0	0	0	0	1	0	1	0	0	0	1	1	k__Metazoa; p__Platyhelminthes; c__Rhabditophora; o__Rhabdocoela; f__Dalyelliidae; g__Microdalyellia; s__Microdalyellia_picta
RE_18S_169	0	0	0	0	7	1	312	375	452	16	0	11	11	0	0	0	0	0	0	0	0	0	0	0	0	0	0	1	0	2	0	0	0	0	0	10	k__Metazoa; p__Platyhelminthes; c__Rhabditophora; o__Rhabdocoela; f__Polycystididae; g__Opisthocystis; s__Opisthocystis_goettei
RE_18S_170	0	2	0	51	47	151	12	28	19	0	0	0	3	5	0	0	0	0	0	0	0	0	0	0	0	0	0	0	0	0	0	0	0	0	0	0	k__Metazoa; p__Platyhelminthes; c__Rhabditophora; o__Rhabdocoela; f__Typhloplanidae
RE_18S_171	0	4	19	3	6	8	0	5	0	88	585	179	3	9	12	6	10	58	0	2	3	0	0	37	1	1	0	1	0	7	0	6	0	0	14	5	k__Metazoa; p__Platyhelminthes; c__Rhabditophora; o__Rhabdocoela; f__Typhloplanidae
RE_18S_172	0	0	0	0	0	0	0	0	1	1	0	0	0	0	0	0	0	0	0	0	0	0	0	0	0	0	0	0	0	0	0	0	0	0	0	0	k__Metazoa; p__Platyhelminthes; c__Rhabditophora; o__Rhabdocoela; f__Typhloplanidae; g__Dochmiotrema; s__Dochmiotrema_limicola
RE_18S_173	100	216	171	350	209	363	94	150	107	34	30	40	72	30	24	507	348	360	26	29	0	1	0	4	84	22	11	36	10	0	11	12	45	1	7	4	k__Metazoa; p__Porifera; c__Demospongiae; o__Spongillida; f__Lubomirskiidae
RE_18S_174	0	1	2	56	65	76	2	9	6	1	0	2	2	4	0	0	0	0	11	0	0	0	0	0	0	0	0	0	1	0	0	0	5	0	1	29	k__Metazoa; p__Tardigrada; c__Eutardigrada; o__Parachela; f__Hypsibiidae; g__Hypsibius; s__Hypsibius_convergens
RE_18S_175	0	0	0	2	2	4	0	0	0	2	0	0	0	1	0	0	0	0	0	0	0	6	0	0	0	0	0	0	0	0	2	1	0	0	0	0	k__Metazoa; p__Tardigrada; c__Eutardigrada; o__Parachela; f__Hypsibiidae; g__Thulinius; s__Thulinius_stephaniae
RE_18S_176	0	4	1	0	2	0	18	15	9	0	1	1	0	0	0	0	1	4	0	0	0	1	0	0	0	0	0	0	0	0	0	0	0	0	39	24	k__Metazoa; p__Tardigrada; c__Eutardigrada; o__Parachela; f__Macrobiotidae; g__Dactylobiotus; s__Dactylobiotus_octavi
COI_ID
RE_COI_1	0	0	0	0	0	0	0	0	0	0	4	3	454	3	0	0	0	0	0	0	0	0	0	0	0	0	0	0	0	0	0	3	0	0	0	0	k__Metazoa; p__Annelida; c__Clitellata; o__Haplotaxida; f__Acanthodrilidae; g__Wegeneriona; s__Wegeneriona_sp._5_DP-2015
RE_COI_2	0	0	0	0	0	0	0	2	1	0	0	0	0	0	0	0	0	0	0	0	0	0	0	0	0	0	0	0	0	0	0	0	0	0	0	0	k__Metazoa; p__Annelida; c__Clitellata; o__Haplotaxida; f__Enchytraeidae; g__Chamaedrilus; s__Chamaedrilus_chalupskyi
RE_COI_3	0	0	0	0	0	0	0	1	3	0	0	0	0	0	0	0	0	0	0	0	0	0	0	0	0	0	0	0	0	0	0	0	0	0	0	0	k__Metazoa; p__Annelida; c__Clitellata; o__Haplotaxida; f__Enchytraeidae; g__Chamaedrilus; s__Chamaedrilus_chalupskyi
RE_COI_4	0	0	0	0	0	0	0	0	0	0	0	0	0	0	0	0	0	0	0	0	0	0	0	0	0	0	0	0	0	0	0	0	0	0	1	335	k__Metazoa; p__Annelida; c__Clitellata; o__Haplotaxida; f__Enchytraeidae; g__Enchytraeus; s__Enchytraeus_luxuriosus
RE_COI_5	0	0	0	0	0	0	0	0	0	0	0	1	0	0	0	0	0	0	0	10	0	0	0	0	0	0	0	0	0	0	0	0	0	0	0	0	k__Metazoa; p__Annelida; c__Clitellata; o__Haplotaxida; f__Lumbricidae; g__Allolobophora; s__Allolobophora_sturanyi
RE_COI_6	74	38	35	0	156	102	0	0	0	0	0	0	0	1	0	0	0	0	0	0	0	0	0	0	0	0	0	0	0	0	0	0	0	0	0	0	k__Metazoa; p__Annelida; c__Clitellata; o__Haplotaxida; f__Megascolecidae; g__Amynthas; s__Amynthas_sp._2_QZ-2013
RE_COI_7	0	0	0	0	0	0	0	0	0	0	0	0	2	0	0	0	0	0	0	0	0	0	0	0	0	0	0	0	0	0	0	0	0	0	0	0	k__Metazoa; p__Annelida; c__Clitellata; o__Haplotaxida; f__Megascolecidae; g__Amynthas; s__Amynthas_sp._GX201305-08
RE_COI_8	0	0	0	0	0	0	0	0	0	0	0	0	3	0	0	0	0	0	49	25	0	0	0	0	0	0	0	0	0	0	0	0	0	0	0	0	k__Metazoa; p__Annelida; c__Clitellata; o__Haplotaxida; f__Megascolecidae; g__Metaphire; s__Metaphire_magna
RE_COI_9	0	0	0	0	0	0	0	0	0	0	0	0	0	0	0	0	0	0	0	0	0	0	0	0	0	0	0	0	0	0	0	15	0	1	0	0	k__Metazoa; p__Annelida; c__Clitellata; o__Haplotaxida; f__Tubificidae; g__Branchiura; s__Branchiura_sowerbyi
RE_COI_10	0	0	0	0	0	0	0	0	0	0	0	0	0	0	0	0	0	0	0	0	0	0	0	0	0	0	0	0	0	3	2	5	5	0	1	0	k__Metazoa; p__Annelida; c__Clitellata; o__Haplotaxida; f__Tubificidae; g__Chaetogaster; s__Chaetogaster_diastrophus
RE_COI_11	0	0	0	0	0	4	0	3	1	0	0	0	0	0	0	0	0	0	0	0	0	0	0	0	0	0	2	1	0	0	5	17	3	0	3	0	k__Metazoa; p__Annelida; c__Clitellata; o__Haplotaxida; f__Tubificidae; g__Chaetogaster; s__Chaetogaster_diastrophus
RE_COI_12	0	0	0	0	0	0	0	5	8	1	0	0	0	0	0	0	0	0	0	0	0	0	0	0	0	0	4	121	0	16	0	1	0	0	0	1	k__Metazoa; p__Annelida; c__Clitellata; o__Haplotaxida; f__Tubificidae; g__Nais; s__Nais_barbata
RE_COI_13	0	0	0	0	0	0	0	5	11	0	0	0	0	0	0	0	0	0	0	0	0	0	0	0	0	0	0	0	0	0	0	0	0	0	0	0	k__Metazoa; p__Annelida; c__Clitellata; o__Haplotaxida; f__Tubificidae; g__Nais; s__Nais_christinae
RE_COI_14	2	1	2	0	2	0	0	5	2	0	0	0	0	0	0	0	0	0	0	0	0	0	0	0	0	0	5	0	0	0	17	60	23	0	0	1	k__Metazoa; p__Annelida; c__Clitellata; o__Haplotaxida; f__Tubificidae; g__Nais; s__Nais_stolci
RE_COI_15	0	0	0	0	0	0	0	6	9	0	0	0	0	0	0	0	0	0	0	0	0	0	0	0	0	0	0	0	0	0	1	19	1	0	0	0	k__Metazoa; p__Annelida; c__Clitellata; o__Haplotaxida; f__Tubificidae; g__Paranais; s__Paranais_frici
RE_COI_16	0	0	0	0	0	0	0	0	0	0	0	0	0	0	0	0	0	0	0	0	0	0	0	0	0	0	0	17	29	88	0	2	1	0	0	1	k__Metazoa; p__Annelida; c__Clitellata; o__Haplotaxida; f__Tubificidae; g__Paranais; s__Paranais_litoralis
RE_COI_17	0	0	0	0	0	0	0	4	5	0	0	0	0	0	0	0	0	0	0	0	0	0	0	0	0	0	0	0	0	0	0	0	0	0	0	0	k__Metazoa; p__Annelida; c__Clitellata; o__Haplotaxida; f__Tubificidae; g__Pristina; s__Pristina_osborni
RE_COI_18	0	0	0	0	0	0	0	7	3	1	0	1	0	0	0	0	0	0	0	0	0	0	0	0	0	0	0	0	0	0	0	0	0	0	0	0	k__Metazoa; p__Annelida; c__Clitellata; o__Haplotaxida; f__Tubificidae; g__Pristina; s__Pristina_osborni
RE_COI_19	1	2	0	0	0	0	0	8	12	0	0	0	0	0	0	0	0	0	0	0	0	0	0	0	0	0	0	0	0	0	0	0	0	0	0	0	k__Metazoa; p__Annelida; c__Clitellata; o__Haplotaxida; f__Tubificidae; g__Slavina; s__Slavina_appendiculata
RE_COI_20	0	0	0	0	0	0	0	0	0	0	0	287	1	3	0	0	0	0	0	0	0	0	0	0	0	0	1	20	323	9	12	15	30	0	0	0	k__Metazoa; p__Annelida; c__Clitellata; o__Haplotaxida; f__Tubificidae; g__Stylaria; s__Stylaria_lacustris
RE_COI_21	0	0	0	0	0	0	0	0	0	0	0	0	0	0	0	0	0	0	2	0	0	0	0	0	0	0	0	0	0	0	0	0	0	0	0	0	k__Metazoa; p__Annelida; c__Polychaeta; o__Capitellida; f__Capitellidae; g__Dasybranchus; s__Dasybranchus_sp._DH1
RE_COI_22	0	0	0	0	0	0	0	0	0	1	0	0	3	0	0	0	0	0	0	0	0	0	0	0	0	0	0	0	0	0	0	0	0	0	0	0	k__Metazoa; p__Annelida; c__Polychaeta; o__Capitellida; f__Capitellidae; g__Dasybranchus; s__Dasybranchus_sp._DH1
RE_COI_23	0	0	0	0	0	0	0	0	0	2	2	1	3	0	0	0	0	0	4	3	0	0	0	0	0	0	0	0	0	0	0	0	0	0	0	0	k__Metazoa; p__Annelida; c__Polychaeta; o__Capitellida; f__Capitellidae; g__Dasybranchus; s__Dasybranchus_sp._DH1
RE_COI_24	0	0	0	0	0	0	0	0	0	0	0	17	0	0	0	0	0	0	0	0	0	0	0	0	0	0	1	0	0	0	0	0	0	0	0	0	k__Metazoa; p__Annelida; c__Polychaeta; o__Capitellida; f__Capitellidae; g__Dasybranchus; s__Dasybranchus_sp._DH1
RE_COI_25	0	0	0	0	0	0	0	3	0	79	86	85	20	5	0	0	0	0	0	2	0	0	0	0	0	0	2	0	0	0	0	0	0	0	0	0	k__Metazoa; p__Annelida; c__Polychaeta; o__Capitellida; f__Capitellidae; g__Dasybranchus; s__Dasybranchus_sp._DH1
RE_COI_26	0	0	0	0	0	0	0	0	0	0	0	0	0	0	0	0	0	0	0	0	0	0	0	0	0	0	0	0	0	0	0	4	0	0	0	0	k__Metazoa; p__Annelida; c__Polychaeta; o__Eunicida; f__Dorvilleidae; g__Ophryotrocha; s__Ophryotrocha_cyclops
RE_COI_27	0	0	0	0	0	0	0	0	0	0	0	0	0	0	0	0	0	0	0	0	0	1	0	2	0	0	0	0	0	0	0	0	0	0	0	0	k__Metazoa; p__Annelida; c__Polychaeta; o__Sabellida; f__Oweniidae; g__Owenia; s__Owenia_fusiformis
RE_COI_28	0	0	0	0	0	0	0	0	0	0	0	0	0	0	0	0	0	0	0	0	0	0	0	0	0	0	0	0	0	0	1	3	6	0	0	0	k__Metazoa; p__Annelida; c__unidentified; o__unidentified; f__unidentified; g__unidentified; s__Annelida_sp._BOLD:ACR0235
RE_COI_29	0	0	0	0	0	0	0	0	0	0	0	3	0	0	0	0	0	0	1	1	0	0	0	0	0	0	9	0	0	0	0	0	0	0	0	0	k__Metazoa; p__Annelida; c__unidentified; o__unidentified; f__unidentified; g__unidentified; s__Annelida_sp._BOLD:ACR0235
RE_COI_30	0	0	0	0	0	0	0	0	0	0	0	0	0	0	0	0	0	0	2	0	0	0	0	0	0	0	0	0	0	0	0	0	0	0	0	0	k__Metazoa; p__Arthropoda; c__Arachnida; o__Araneae; f__Agelenidae; g__Sinocoelotes; s__Sinocoelotes_pseudoterrestris
RE_COI_31	0	0	0	0	0	0	0	0	0	0	0	0	0	0	0	0	0	0	0	0	0	0	0	0	0	0	2	0	0	0	0	0	0	0	0	0	k__Metazoa; p__Arthropoda; c__Arachnida; o__Araneae; f__Amaurobiidae; g__Callobius; s__Callobius_bennetti
RE_COI_32	1	2	0	0	0	0	0	0	0	0	0	0	0	0	0	0	0	0	0	0	0	0	0	0	0	0	0	0	0	0	0	0	0	0	0	0	k__Metazoa; p__Arthropoda; c__Arachnida; o__Araneae; f__Antrodiaetidae; g__Aliatypus; s__Aliatypus_coylei
RE_COI_33	0	1	0	0	0	0	0	0	0	0	0	1	0	0	0	0	0	0	0	0	0	0	0	0	0	0	0	0	0	0	0	1	0	0	0	0	k__Metazoa; p__Arthropoda; c__Arachnida; o__Araneae; f__Antrodiaetidae; g__Atypoides; s__Atypoides_riversi
RE_COI_34	1	2	0	0	0	0	0	0	0	0	0	0	0	0	0	0	0	0	0	0	0	0	0	0	0	0	0	0	0	0	0	0	0	0	0	0	k__Metazoa; p__Arthropoda; c__Arachnida; o__Araneae; f__Archaeidae; g__Austrarchaea; s__Austrarchaea_mainae
RE_COI_35	0	0	0	0	0	0	0	0	0	0	0	0	0	0	0	0	0	0	0	0	0	0	0	2	0	0	0	0	0	0	0	0	0	0	0	0	k__Metazoa; p__Arthropoda; c__Arachnida; o__Araneae; f__Archaeidae; g__Eriauchenius; s__Eriauchenius_borimontsina
RE_COI_36	0	0	0	0	0	0	0	0	0	0	0	0	0	0	0	0	0	0	3	1	0	0	0	0	0	0	0	0	0	0	1	0	0	0	0	0	k__Metazoa; p__Arthropoda; c__Arachnida; o__Araneae; f__Archaeidae; g__Eriauchenius; s__Eriauchenius_sp._5_HMW-2014
RE_COI_37	0	0	0	0	0	0	0	0	0	0	0	0	0	0	0	0	0	0	2	0	0	0	0	0	0	0	0	0	0	0	0	0	0	0	0	0	k__Metazoa; p__Arthropoda; c__Arachnida; o__Araneae; f__Archaeidae; g__Eriauchenius; s__Eriauchenius_vadoni
RE_COI_38	0	0	0	0	2	3	0	0	0	0	0	0	0	0	0	0	0	0	0	0	0	0	0	0	0	0	0	0	0	0	0	0	0	0	0	0	k__Metazoa; p__Arthropoda; c__Arachnida; o__Araneae; f__Archaeidae; g__Eriauchenius; s__Eriauchenius_workmani
RE_COI_39	0	0	0	0	0	0	0	0	0	0	0	0	0	0	0	0	0	0	2	0	0	0	0	0	0	0	0	0	0	0	0	0	0	0	0	0	k__Metazoa; p__Arthropoda; c__Arachnida; o__Araneae; f__Clubionidae; g__Clubiona; s__Clubiona_pikei
RE_COI_40	0	0	0	0	4	2	0	9	3	0	0	0	0	0	0	0	0	0	0	0	0	0	0	0	0	0	0	0	0	0	0	0	0	0	0	0	k__Metazoa; p__Arthropoda; c__Arachnida; o__Araneae; f__Dysderidae; g__Dysdera; s__Dysdera_ramblae
RE_COI_41	1	0	0	0	14	4	0	0	0	0	0	0	0	0	0	0	0	0	0	0	0	0	0	0	0	0	0	0	0	0	3	1	0	0	0	0	k__Metazoa; p__Arthropoda; c__Arachnida; o__Araneae; f__Dysderidae; g__Harpactea; s__Harpactea_rubicunda
RE_COI_42	0	0	0	0	0	0	0	0	0	0	0	0	0	0	0	0	0	0	0	0	0	0	0	0	0	0	0	0	0	0	0	0	0	0	2	0	k__Metazoa; p__Arthropoda; c__Arachnida; o__Araneae; f__Hypochilidae; g__Hypochilus; s__Hypochilus_coylei
RE_COI_43	1	5	0	0	0	0	0	0	0	0	0	1	0	0	0	0	0	0	0	0	0	0	0	0	0	0	0	0	0	0	0	0	0	0	0	0	k__Metazoa; p__Arthropoda; c__Arachnida; o__Araneae; f__Leptonetidae; g__Neoleptoneta; s__Neoleptoneta_myopica
RE_COI_44	0	0	0	0	0	0	0	0	1	138	1	0	11	0	0	0	0	0	0	0	0	0	0	0	0	0	0	0	0	0	0	0	0	0	0	0	k__Metazoa; p__Arthropoda; c__Arachnida; o__Araneae; f__Linyphiidae; g__Erigone; s__Erigone_prominens
RE_COI_45	0	0	0	0	0	0	0	0	1	27	30	29	48	15	0	0	0	0	1	2	0	0	0	2	0	0	0	0	0	0	0	0	0	0	0	0	k__Metazoa; p__Arthropoda; c__Arachnida; o__Araneae; f__Linyphiidae; g__Poeciloneta; s__Poeciloneta_bihamata
RE_COI_46	0	0	0	0	0	0	0	0	0	0	1	35	1	0	0	0	0	0	0	0	0	0	0	0	0	0	0	0	0	0	0	0	0	0	0	0	k__Metazoa; p__Arthropoda; c__Arachnida; o__Araneae; f__Linyphiidae; g__Ummeliata; s__Ummeliata_feminea
RE_COI_47	0	1	12	0	0	0	0	0	0	0	0	0	1	0	0	0	0	0	54	13	0	0	0	0	0	0	7	0	0	0	0	0	0	0	0	0	k__Metazoa; p__Arthropoda; c__Arachnida; o__Araneae; f__Lycosidae; g__Aulonia; s__Aulonia_albimana
RE_COI_48	0	0	0	0	0	1	0	0	0	1	8	2	0	1	0	0	0	0	0	0	0	0	0	1	0	0	9	0	0	0	0	0	0	0	0	0	k__Metazoa; p__Arthropoda; c__Arachnida; o__Araneae; f__Lycosidae; g__Pirata; s__Piratula_insularis
RE_COI_49	0	0	0	0	2	4	0	0	0	0	0	0	0	0	0	0	0	0	0	0	0	0	0	0	0	0	0	0	0	0	0	0	0	0	0	0	k__Metazoa; p__Arthropoda; c__Arachnida; o__Araneae; f__Migidae; g__Moggridgea; s__Moggridgea_tingle
RE_COI_50	0	0	0	0	0	0	0	0	5	0	0	0	0	0	0	0	0	0	0	0	0	0	0	0	0	0	0	0	0	0	0	0	0	0	0	0	k__Metazoa; p__Arthropoda; c__Arachnida; o__Araneae; f__Mimetidae; g__Ero; s__Ero_sp._GH1027
RE_COI_51	1	1	0	0	2	0	0	0	0	2	7	1	1	0	0	0	0	0	6	3	0	0	0	1	0	0	0	3	0	0	0	4	2	0	0	0	k__Metazoa; p__Arthropoda; c__Arachnida; o__Araneae; f__Nemesiidae; g__Chenistonia; s__Chenistonia_sp._MYG349
RE_COI_52	0	0	0	0	1	0	0	0	0	0	0	2	1	0	0	0	0	0	9	20	0	3	0	8	0	0	3	17	4	0	12	25	7	0	0	7	k__Metazoa; p__Arthropoda; c__Arachnida; o__Araneae; f__Phyxelididae; g__Ambohima; s__Ambohima_sublima
RE_COI_53	0	0	0	0	0	0	0	0	0	1	4	2	0	0	0	0	0	0	0	0	0	0	0	0	0	0	0	0	0	0	0	0	0	0	0	0	k__Metazoa; p__Arthropoda; c__Arachnida; o__Araneae; f__Salticidae; g__Helpis; s__Helpis_minitabunda
RE_COI_54	0	0	0	0	0	0	0	3	0	0	0	0	0	0	0	0	0	0	0	0	0	0	0	0	0	0	0	0	0	0	0	0	0	0	0	0	k__Metazoa; p__Arthropoda; c__Arachnida; o__Araneae; f__Salticidae; g__Popcornella; s__Popcornella_nigromaculata
RE_COI_55	10	4	26	0	378	403	0	350	225	4	0	0	0	0	0	0	0	0	0	0	0	0	0	0	0	0	0	0	0	0	0	0	0	0	0	1	k__Metazoa; p__Arthropoda; c__Arachnida; o__Araneae; f__Theridiidae; g__Pholcomma; s__Pholcomma_gibbum
RE_COI_56	1	0	0	0	0	0	0	0	0	0	0	0	0	0	0	0	0	0	0	0	0	0	0	0	0	0	4	0	0	0	0	0	0	0	0	0	k__Metazoa; p__Arthropoda; c__Arachnida; o__Astigmata; f__Avenzoariidae; g__Bychovskiata; s__Bychovskiata_squatarolae
RE_COI_57	24	14	15	0	0	0	0	4	3	0	0	0	0	0	0	0	0	0	0	0	0	0	0	0	0	0	0	0	0	0	0	0	0	0	0	0	k__Metazoa; p__Arthropoda; c__Arachnida; o__Astigmata; f__Avenzoariidae; g__Zachvatkinia; s__Zachvatkinia_isolata
RE_COI_58	0	0	0	0	0	0	0	0	0	3	2	0	0	0	0	0	0	0	0	0	0	0	0	0	0	0	0	0	0	0	0	0	0	0	0	0	k__Metazoa; p__Arthropoda; c__Arachnida; o__Astigmata; f__Proctophyllodidae; g__Proctophyllodes; s__Proctophyllodes_vitzthumi
RE_COI_59	0	0	0	0	0	0	0	0	0	11	0	0	0	0	0	0	0	0	0	0	0	0	0	0	0	0	0	0	0	0	0	0	0	0	0	0	k__Metazoa; p__Arthropoda; c__Arachnida; o__Astigmata; f__Trouessartiidae; g__Steatacarus; s__Steatacarus_bifiditibia
RE_COI_60	6	3	22	0	0	0	0	0	0	29	69	29	44	11	0	0	0	0	1012	54	0	2	0	2	0	0	1	0	0	0	0	0	0	0	0	0	k__Metazoa; p__Arthropoda; c__Arachnida; o__Astigmata; f__Trouessartiidae; g__Trouessartia; s__Trouessartia_rubecula
RE_COI_61	0	0	0	0	0	0	0	0	0	0	1	33	0	0	0	0	0	0	0	0	0	0	0	1	0	0	0	0	0	0	0	0	0	0	0	0	k__Metazoa; p__Arthropoda; c__Arachnida; o__Endeostigmata; f__Terpnacaridae; g__unidentified; s__Terpnacaridae_sp._BOLD:AAZ4544
RE_COI_62	0	0	0	0	0	0	0	11	3	0	0	0	0	0	0	0	0	0	83	0	0	0	0	0	0	0	0	0	0	1	0	0	38	0	0	0	k__Metazoa; p__Arthropoda; c__Arachnida; o__Ixodida; f__Ixodidae; g__Dermacentor; s__Dermacentor_albipictus
RE_COI_63	0	0	0	0	0	0	0	0	0	0	0	6	0	0	0	0	0	0	0	0	0	0	0	0	0	0	0	0	0	0	0	0	0	0	0	0	k__Metazoa; p__Arthropoda; c__Arachnida; o__Mesostigmata; f__Digamasellidae; g__unidentified; s__Digamasellidae_sp._BOLD:ACD9007
RE_COI_64	0	0	0	0	0	0	0	0	0	7	7	4	18	3	0	0	0	0	4	0	0	0	0	0	0	0	19	0	0	0	0	0	0	0	0	0	k__Metazoa; p__Arthropoda; c__Arachnida; o__Mesostigmata; f__Laelapidae; g__Laelaps; s__Laelaps_muricola
RE_COI_65	0	0	0	0	0	0	0	0	0	0	0	1	1	33	0	0	0	0	0	0	0	0	0	0	0	0	0	0	0	0	0	0	0	0	0	0	k__Metazoa; p__Arthropoda; c__Arachnida; o__Mesostigmata; f__Parasitidae; g__unidentified; s__Parasitidae_sp._BOLD:AAN6701
RE_COI_66	0	0	0	0	0	0	0	0	0	0	162	0	2	0	0	0	0	0	0	0	0	0	0	0	0	0	0	0	0	0	0	0	0	0	0	0	k__Metazoa; p__Arthropoda; c__Arachnida; o__Mesostigmata; f__Phytoseiidae; g__Typhloseiulus; s__Typhloseiulus_rodopiensis
RE_COI_67	0	0	0	0	0	0	0	0	0	0	0	0	3	0	0	0	0	0	0	0	0	0	0	0	0	0	0	0	0	0	0	0	0	0	0	0	k__Metazoa; p__Arthropoda; c__Arachnida; o__Mesostigmata; f__Phytoseiidae; g__unidentified; s__Phytoseiidae_sp._BOLD:ABV2831
RE_COI_68	0	0	4	0	0	0	0	0	0	0	0	0	0	0	0	0	0	0	0	0	0	0	0	0	0	0	0	0	0	0	0	0	0	0	0	0	k__Metazoa; p__Arthropoda; c__Arachnida; o__Opiliones; f__Neogoveidae; g__Neogovea; s__Neogovea_sp._DNA101686
RE_COI_69	0	0	0	0	0	0	0	0	4	0	0	0	0	0	0	0	0	0	0	0	0	0	0	0	0	0	0	0	0	0	0	0	0	0	0	0	k__Metazoa; p__Arthropoda; c__Arachnida; o__Opiliones; f__Neopilionidae; g__Forsteropsalis; s__Forsteropsalis_nigra
RE_COI_70	3	0	21	0	0	0	0	0	0	0	0	0	0	0	0	0	0	0	0	0	0	0	0	0	0	0	0	0	0	0	0	0	0	0	0	0	k__Metazoa; p__Arthropoda; c__Arachnida; o__Oribatida; f__Cepheidae; g__Oribatodes; s__Oribatodes_mirabilis
RE_COI_71	0	0	0	0	0	0	0	0	0	6	0	0	0	1	0	0	0	0	0	0	0	0	0	0	0	0	0	0	0	0	0	0	0	0	0	0	k__Metazoa; p__Arthropoda; c__Arachnida; o__Oribatida; f__Ceratozetidae; g__Dentizetes; s__Dentizetes_sp._BOLD:ACE1282
RE_COI_72	0	0	0	0	0	0	0	0	0	15	0	0	0	0	0	0	0	0	0	0	0	0	0	0	0	0	0	0	0	0	0	0	0	0	0	0	k__Metazoa; p__Arthropoda; c__Arachnida; o__Oribatida; f__Hydrozetidae; g__Hydrozetes; s__Hydrozetes_sp._BOLD:AAF9074
RE_COI_73	0	0	0	0	0	0	0	0	0	0	0	29	0	0	0	0	0	0	0	0	0	0	0	0	0	0	0	0	0	0	0	0	0	0	0	0	k__Metazoa; p__Arthropoda; c__Arachnida; o__Oribatida; f__Oppiidae; g__Oppiella; s__Oppiella_nova
RE_COI_74	0	0	0	0	0	0	0	0	0	0	0	0	0	0	0	0	0	0	0	0	0	4	0	0	0	0	0	0	0	0	0	0	0	0	0	0	k__Metazoa; p__Arthropoda; c__Arachnida; o__Oribatida; f__Phenopelopidae; g__Eupelops; s__Eupelops_septentrionalis
RE_COI_75	0	0	0	0	0	0	0	0	0	0	0	0	0	0	0	0	0	0	201	0	0	0	2	0	0	0	0	0	0	0	0	0	0	0	0	0	k__Metazoa; p__Arthropoda; c__Arachnida; o__Oribatida; f__Tectocepheidae; g__Tectocepheus; s__Tectocepheus_sp._BOLD:ABV3688
RE_COI_76	1	0	0	0	0	1	0	0	0	0	0	0	1	0	0	0	0	0	0	0	0	0	0	0	0	0	1	0	0	0	0	0	0	0	0	0	k__Metazoa; p__Arthropoda; c__Arachnida; o__Scorpiones; f__Bothriuridae; g__Brachistosternus; s__Brachistosternus_chango
RE_COI_77	0	0	0	0	0	0	0	0	0	0	0	0	0	0	0	0	0	0	4	0	0	0	0	0	0	0	0	0	0	0	0	0	0	0	0	0	k__Metazoa; p__Arthropoda; c__Arachnida; o__Scorpiones; f__Buthidae; g__Hottentotta; s__Hottentotta_gentili
RE_COI_78	0	0	5	0	0	0	0	0	0	0	0	0	0	0	0	0	0	0	0	0	0	0	0	0	0	0	0	0	0	0	0	0	0	0	0	0	k__Metazoa; p__Arthropoda; c__Arachnida; o__Scorpiones; f__Scorpionidae; g__Opistophthalmus; s__Opistophthalmus_boehmi
RE_COI_79	0	0	0	0	0	0	0	0	0	3	19	9	0	1	0	0	0	0	0	0	0	0	0	0	0	0	0	0	0	0	0	0	0	0	0	0	k__Metazoa; p__Arthropoda; c__Arachnida; o__Scorpiones; f__Vaejovidae; g__Mesomexovis; s__Mesomexovis_atenango
RE_COI_80	1	0	1	0	0	0	0	0	0	2	3	0	0	0	0	0	0	0	3	1	0	0	0	0	0	0	0	0	0	0	0	0	0	0	0	0	k__Metazoa; p__Arthropoda; c__Arachnida; o__Trombidiformes; f__Anystidae; g__unidentified; s__Anystidae_sp._BOLD:AAM7965
RE_COI_81	66	35	57	0	0	2	0	0	0	0	0	23	33	0	0	0	0	0	0	0	0	0	0	0	0	0	0	0	0	0	0	0	0	0	0	0	k__Metazoa; p__Arthropoda; c__Arachnida; o__Trombidiformes; f__Bdellidae; g__Cyta; s__Cyta_sp._BOLD:AAZ0400
RE_COI_82	0	0	0	0	0	0	0	0	0	38	0	0	0	0	0	0	0	0	0	0	0	0	0	0	0	0	0	0	0	0	0	0	0	0	0	0	k__Metazoa; p__Arthropoda; c__Arachnida; o__Trombidiformes; f__Cunaxidae; g__unidentified; s__Cunaxidae_sp._BOLD:AAZ6805
RE_COI_83	0	0	0	0	0	0	0	0	0	0	0	0	0	0	0	0	0	0	0	1	0	2	1	3	0	0	8	0	0	0	0	0	0	0	0	0	k__Metazoa; p__Arthropoda; c__Arachnida; o__Trombidiformes; f__Cunaxidae; g__unidentified; s__Cunaxidae_sp._BOLD:ACI7184
RE_COI_84	5	3	0	0	0	0	0	0	0	2	16	7	6	1	0	0	0	0	0	0	0	0	0	0	0	0	0	7	0	3	3	0	0	0	0	0	k__Metazoa; p__Arthropoda; c__Arachnida; o__Trombidiformes; f__Eupodidae; g__unidentified; s__Eupodidae_sp._BOLD:AAU6276
RE_COI_85	0	0	0	0	0	0	0	0	0	0	3	0	0	0	0	0	0	0	0	0	0	0	0	0	0	0	0	0	0	0	0	0	0	0	0	0	k__Metazoa; p__Arthropoda; c__Arachnida; o__Trombidiformes; f__Eupodidae; g__unidentified; s__Eupodidae_sp._BOLD:ACE1359
RE_COI_86	0	0	0	0	0	0	0	0	0	0	0	0	0	0	0	0	0	0	0	0	0	0	0	0	0	0	0	0	0	0	0	6	0	0	0	0	k__Metazoa; p__Arthropoda; c__Arachnida; o__Trombidiformes; f__Eupodidae; g__unidentified; s__Eupodidae_sp._BOLD:ACI6340
RE_COI_87	0	0	0	0	0	0	0	0	0	0	0	0	12	0	0	0	0	0	0	0	0	0	0	0	0	0	0	0	0	0	3	0	1	0	0	0	k__Metazoa; p__Arthropoda; c__Arachnida; o__Trombidiformes; f__Penthaleidae; g__unidentified; s__Penthaleidae_sp._Q080
RE_COI_88	0	0	0	0	0	0	0	0	0	0	0	0	0	0	0	0	0	0	0	0	0	0	0	0	0	0	0	0	0	0	197	1	0	2	0	0	k__Metazoa; p__Arthropoda; c__Arachnida; o__Trombidiformes; f__Pionidae; g__Piona; s__Piona_imminuta
RE_COI_89	0	3	35	0	19	18	0	0	5	1	0	2	7	3	0	0	0	0	0	0	0	0	0	0	0	0	0	0	0	0	0	0	0	0	0	1	k__Metazoa; p__Arthropoda; c__Arachnida; o__Trombidiformes; f__Rhagidiidae; g__unidentified; s__Rhagidiidae_sp._BOLD:AAM8045
RE_COI_90	0	0	0	0	0	0	0	0	0	0	13	0	0	0	0	0	0	0	0	0	0	0	0	0	0	0	0	0	0	0	0	0	0	0	1	0	k__Metazoa; p__Arthropoda; c__Arachnida; o__Trombidiformes; f__Siteroptidae; g__unidentified; s__Siteroptidae_sp._BOLD:AAW0386
RE_COI_91	1	0	13	0	0	0	0	0	0	0	0	0	0	0	0	0	0	0	0	0	0	0	0	0	0	0	0	0	0	0	0	0	0	0	0	0	k__Metazoa; p__Arthropoda; c__Arachnida; o__Trombidiformes; f__Stigmaeidae; g__unidentified; s__Stigmaeidae_sp._BOLD:ACL9060
RE_COI_92	0	0	0	0	0	0	0	0	0	1	5	5	4	2	0	0	0	0	0	0	0	0	0	0	0	0	0	0	0	0	0	0	0	0	0	0	k__Metazoa; p__Arthropoda; c__Arachnida; o__Trombidiformes; f__Tarsonemidae; g__unidentified; s__Tarsonemidae_sp._BOLD:ABV1837
RE_COI_93	0	0	0	0	0	0	0	0	0	0	0	8	0	0	0	0	0	0	0	0	0	0	0	0	0	0	0	0	0	0	0	0	0	0	0	0	k__Metazoa; p__Arthropoda; c__Arachnida; o__Trombidiformes; f__Tetranychidae; g__Oligonychus; s__Oligonychus_modestus
RE_COI_94	0	0	0	0	0	0	0	0	0	0	0	11	0	0	0	0	0	0	0	0	0	0	0	0	0	0	0	0	0	0	0	0	0	0	0	0	k__Metazoa; p__Arthropoda; c__Arachnida; o__Trombidiformes; f__Tydeidae; g__unidentified; s__Tydeidae_sp._BOLD:AAZ5850
RE_COI_95	0	0	0	0	0	0	0	0	0	0	0	0	0	0	0	4	3	5	0	0	0	0	0	0	0	0	0	0	0	0	0	0	0	0	0	0	k__Metazoa; p__Arthropoda; c__Arachnida; o__Trombidiformes; f__Tydeidae; g__unidentified; s__Tydeidae_sp._BOLD:ACG5381
RE_COI_96	0	0	0	0	0	0	0	0	0	10	12	3	0	0	0	0	0	0	0	0	0	3	0	0	0	0	0	0	0	0	0	0	0	0	0	0	k__Metazoa; p__Arthropoda; c__Arachnida; o__unidentified; f__unidentified; g__unidentified; s__Arachnida_sp._BOLD:ACI6948
RE_COI_97	0	0	0	0	0	0	0	0	0	0	0	0	0	0	0	0	0	0	0	0	0	0	0	0	0	0	0	42	0	0	0	0	0	0	0	0	k__Metazoa; p__Arthropoda; c__Arachnida; o__unidentified; f__unidentified; g__unidentified; s__Sarcoptiformes_sp._BOLD:ACG2525
RE_COI_98	0	0	0	0	0	0	0	0	0	0	0	7	0	0	0	0	0	0	0	0	0	0	0	0	0	0	0	0	0	0	0	0	0	0	0	0	k__Metazoa; p__Arthropoda; c__Arachnida; o__unidentified; f__unidentified; g__unidentified; s__Sarcoptiformes_sp._BOLD:ACK4993
RE_COI_99	0	0	0	0	0	0	0	0	0	0	1	1	0	8	0	0	0	0	0	0	0	0	0	0	0	0	0	0	0	0	0	0	0	0	0	0	k__Metazoa; p__Arthropoda; c__Arachnida; o__unidentified; f__unidentified; g__unidentified; s__Sarcoptiformes_sp._BOLD:ACM5712
RE_COI_100	0	0	0	0	0	0	0	0	0	0	4	0	0	0	0	0	0	0	0	0	0	0	0	0	0	0	0	0	0	0	1	0	0	0	0	0	k__Metazoa; p__Arthropoda; c__Branchiopoda; o__Anostraca; f__Branchipodidae; g__Branchipus; s__Branchipus_sp._A4_BschTrie
RE_COI_101	0	0	0	0	0	0	0	0	0	0	0	0	0	0	0	0	0	0	0	0	0	0	0	0	0	0	0	0	0	0	0	3	0	1	0	0	k__Metazoa; p__Arthropoda; c__Chilopoda; o__Scolopendromorpha; f__Scolopocryptopidae; g__Newportia; s__Newportia_stolli
RE_COI_102	0	0	0	0	5	3	0	0	0	0	0	0	0	0	0	0	0	0	0	0	0	0	0	0	0	0	0	0	0	0	0	0	0	0	0	0	k__Metazoa; p__Arthropoda; c__Collembola; o__unidentified; f__Bourletiellidae; g__unidentified; s__Bourletiellidae_sp._BOLD:ACE1899
RE_COI_103	0	0	0	0	0	0	0	0	0	0	0	0	0	0	0	0	0	0	1	34	0	1	0	0	0	0	0	0	0	0	0	1	0	0	0	0	k__Metazoa; p__Arthropoda; c__Collembola; o__unidentified; f__Entomobryidae; g__Himalanura; s__Himalanura_sp._BXW-2014
RE_COI_104	0	0	0	0	0	0	0	0	0	12	6	44	1	21	0	0	0	0	0	0	0	0	0	0	0	0	0	0	0	0	0	0	0	0	0	0	k__Metazoa; p__Arthropoda; c__Collembola; o__unidentified; f__Entomobryidae; g__Homidia; s__Homidia_socia
RE_COI_105	0	0	0	0	0	0	0	0	0	1	4	14	0	0	0	0	0	0	0	0	0	0	0	0	0	0	0	0	0	0	0	0	0	0	0	0	k__Metazoa; p__Arthropoda; c__Collembola; o__unidentified; f__Entomobryidae; g__Homidia; s__Homidia_tiantaiensis
RE_COI_106	0	0	0	0	0	0	0	11	2	798	156	104	7	5	0	0	0	0	0	0	0	1	0	0	0	0	0	0	0	0	0	0	0	0	0	0	k__Metazoa; p__Arthropoda; c__Collembola; o__unidentified; f__Entomobryidae; g__Homidia; s__Homidia_tiantaiensis
RE_COI_107	0	0	0	0	0	0	0	1	0	1	1	0	1	0	0	0	0	0	0	0	0	0	0	0	0	0	0	0	0	0	0	0	0	0	0	0	k__Metazoa; p__Arthropoda; c__Collembola; o__unidentified; f__Entomobryidae; g__Lepidocyrtus; s__Lepidocyrtus_sp._BOLD:ACF7013
RE_COI_108	0	0	0	0	0	0	0	1	0	61	309	208	0	1	0	0	0	0	0	0	0	0	0	0	0	0	0	0	0	0	0	0	0	0	0	0	k__Metazoa; p__Arthropoda; c__Collembola; o__unidentified; f__Entomobryidae; g__Lepidocyrtus; s__Lepidocyrtus_sp._BXW-2014
RE_COI_109	0	0	0	0	0	0	0	0	1	36	81	118	83	325	0	0	0	0	0	0	0	0	0	0	0	0	0	0	0	0	0	0	0	0	0	0	k__Metazoa; p__Arthropoda; c__Collembola; o__unidentified; f__Hypogastruridae; g__Ceratophysella; s__Ceratophysella_sp._BOLD:ACE6295
RE_COI_110	0	0	0	0	0	0	0	15	4	186	486	987	137	404	0	0	0	0	0	0	0	0	0	0	0	0	0	0	0	0	0	0	0	0	0	0	k__Metazoa; p__Arthropoda; c__Collembola; o__unidentified; f__Hypogastruridae; g__Ceratophysella; s__Ceratophysella_sp._BOLD:ACE6295
RE_COI_111	0	3	1	0	0	4	0	183	141	5440	9468	8243	6010	25978	0	0	0	0	0	1	0	2	1	0	0	0	1	0	2	7	1	2	1	4	1	1	k__Metazoa; p__Arthropoda; c__Collembola; o__unidentified; f__Hypogastruridae; g__Ceratophysella; s__Ceratophysella_sp._BOLD:ACE6295
RE_COI_112	0	0	0	0	0	0	0	0	0	0	6	6	9	0	0	0	0	0	0	0	0	0	0	0	0	0	0	0	0	0	0	0	0	0	0	0	k__Metazoa; p__Arthropoda; c__Collembola; o__unidentified; f__Isotomidae; g__Desoria; s__Desoria_klovstadi
RE_COI_113	1	2	2	0	0	0	0	0	0	0	0	6	0	0	0	0	0	0	0	0	0	0	0	0	0	0	0	0	0	0	0	0	0	0	0	2	k__Metazoa; p__Arthropoda; c__Collembola; o__unidentified; f__Isotomidae; g__Folsomides; s__Folsomides_parvulus
RE_COI_114	0	0	0	0	0	0	0	0	0	0	0	0	0	3	0	0	0	0	0	0	0	0	0	0	0	0	0	0	0	0	0	0	0	0	0	0	k__Metazoa; p__Arthropoda; c__Collembola; o__unidentified; f__Isotomidae; g__Parisotoma; s__Parisotoma_notabilis_L1
RE_COI_115	0	0	0	0	0	0	0	1	2	32	5	108	112	28	0	0	0	0	0	2	0	0	0	0	0	0	0	0	0	0	0	0	0	0	0	0	k__Metazoa; p__Arthropoda; c__Collembola; o__unidentified; f__Isotomidae; g__Parisotoma; s__Parisotoma_sp._DP-2013
RE_COI_116	0	0	0	0	0	0	0	0	0	0	1	0	3	0	0	0	0	0	0	0	0	0	0	0	0	0	0	0	0	0	0	0	0	0	0	0	k__Metazoa; p__Arthropoda; c__Collembola; o__unidentified; f__Katiannidae; g__Sminthurinus; s__Sminthurinus_niger
RE_COI_117	0	0	0	0	0	0	0	0	0	0	347	3	2	1	0	0	0	0	0	0	0	0	0	0	0	0	0	0	0	0	0	0	0	0	0	0	k__Metazoa; p__Arthropoda; c__Collembola; o__unidentified; f__Onychiuridae; g__unidentified; s__Onychiuridae_sp._BMNH-1424164
RE_COI_118	0	0	0	0	0	0	0	0	0	0	1	7	0	0	0	0	0	0	0	0	0	0	0	0	0	0	0	0	0	0	0	0	0	0	0	0	k__Metazoa; p__Arthropoda; c__Collembola; o__unidentified; f__Seiridae; g__Seira; s__Seira_sp._BXW-2014
RE_COI_119	0	0	0	0	0	0	0	0	0	10	4	0	0	0	0	0	0	0	0	0	0	0	0	0	0	0	0	0	0	0	0	0	0	0	0	0	k__Metazoa; p__Arthropoda; c__Collembola; o__unidentified; f__Sminthuridae; g__unidentified; s__Sminthuridae_sp._DPCOL105364
RE_COI_120	0	0	0	0	0	0	0	0	0	0	0	2	118	9	0	0	0	0	0	0	0	0	0	0	0	0	0	0	0	0	0	0	0	0	0	0	k__Metazoa; p__Arthropoda; c__Collembola; o__unidentified; f__Sminthuridae; g__unidentified; s__Sminthuridae_sp._DPCOL105364
RE_COI_121	0	0	0	0	0	0	0	0	0	27	5	0	0	9	0	0	0	0	0	0	0	0	0	0	0	0	0	0	0	0	0	0	0	0	0	0	k__Metazoa; p__Arthropoda; c__Collembola; o__unidentified; f__Sminthurididae; g__Sminthurides; s__Sminthurides_malmgreni_L2
RE_COI_122	0	0	0	0	0	0	0	0	0	1	1	0	1	1	0	0	0	0	6	2	0	0	0	0	0	0	0	0	0	0	2	0	0	0	0	0	k__Metazoa; p__Arthropoda; c__Diplopoda; o__Polydesmida; f__Paradoxosomatidae; g__Somethus; s__Somethus_lancearius
RE_COI_123	0	0	0	0	0	0	0	0	0	0	2	3	0	0	0	0	0	0	0	0	0	0	0	0	0	0	0	0	0	0	0	0	0	0	0	0	k__Metazoa; p__Arthropoda; c__Diplopoda; o__Polydesmida; f__Xystodesmidae; g__Appalachioria; s__Appalachioria_falcifera
RE_COI_124	17	11	5	0	0	2	0	0	0	0	0	0	0	0	0	0	0	0	1	0	0	0	0	0	0	0	0	0	0	0	0	0	0	0	0	0	k__Metazoa; p__Arthropoda; c__Diplopoda; o__unidentified; f__Sphaerotheriidae; g__Sphaeromimus; s__Sphaeromimus_andohahela
RE_COI_125	0	0	0	0	0	0	0	0	0	0	4	0	0	0	0	0	0	0	0	0	0	0	0	0	0	0	0	0	0	0	0	0	0	0	0	0	k__Metazoa; p__Arthropoda; c__Insecta; o__Coleoptera; f__Bothrideridae; g__Teredus; s__Teredus_cylindricus
RE_COI_126	0	0	0	0	0	0	0	0	0	0	0	0	3	4	0	0	0	0	0	0	0	0	0	0	0	0	0	0	0	0	0	0	0	0	0	0	k__Metazoa; p__Arthropoda; c__Insecta; o__Coleoptera; f__Carabidae; g__Amara; s__Amara_strenua
RE_COI_127	0	0	0	0	0	0	0	0	0	1	5	7	3	0	0	0	0	0	2	0	0	0	0	0	0	0	0	0	0	0	0	0	0	0	0	0	k__Metazoa; p__Arthropoda; c__Insecta; o__Coleoptera; f__Carabidae; g__Bembidion; s__Bembidion_fulvipes
RE_COI_128	0	0	0	0	0	0	0	0	0	1	4	4	4	3	0	0	0	0	0	0	0	0	0	0	0	0	0	0	0	0	0	0	0	0	0	0	k__Metazoa; p__Arthropoda; c__Insecta; o__Coleoptera; f__Carabidae; g__Bembidion; s__Bembidion_gilvipes
RE_COI_129	0	0	0	0	0	0	0	0	0	2	11	0	16	6	0	0	0	0	7	2	0	0	0	0	0	0	0	0	0	0	0	0	0	0	0	0	k__Metazoa; p__Arthropoda; c__Insecta; o__Coleoptera; f__Carabidae; g__Calleida; s__Calleida_viridis
RE_COI_130	1	1	0	0	0	0	0	0	0	0	0	0	0	0	0	0	0	0	0	0	0	0	0	0	0	0	0	0	0	0	1	0	0	0	0	0	k__Metazoa; p__Arthropoda; c__Insecta; o__Coleoptera; f__Carabidae; g__Calosoma; s__Calosoma_macrum
RE_COI_131	0	0	0	0	0	0	0	0	0	0	0	0	0	0	0	0	0	0	2	0	0	0	0	0	0	0	0	0	0	0	0	0	0	0	0	0	k__Metazoa; p__Arthropoda; c__Insecta; o__Coleoptera; f__Carabidae; g__Dyschirius; s__Dyschirius_tristis
RE_COI_132	0	0	0	0	0	0	0	0	0	7	6	5	1	1	0	0	0	0	15	1	0	9	2	3	0	0	0	0	0	0	0	0	0	0	0	0	k__Metazoa; p__Arthropoda; c__Insecta; o__Coleoptera; f__Carabidae; g__Pterostichus; s__Pterostichus_angoarnigi
RE_COI_133	0	0	0	0	0	0	0	0	0	0	3	0	0	0	0	0	0	0	0	0	0	0	0	0	0	0	0	0	0	0	0	0	0	0	0	0	k__Metazoa; p__Arthropoda; c__Insecta; o__Coleoptera; f__Carabidae; g__Pterostichus; s__Pterostichus_jurinei
RE_COI_134	1	0	3	0	0	0	0	0	0	0	0	0	0	0	0	0	0	0	0	0	0	0	0	0	0	0	0	0	0	0	0	0	0	0	0	0	k__Metazoa; p__Arthropoda; c__Insecta; o__Coleoptera; f__Chrysomelidae; g__Monolepta; s__Monolepta_sp._KKY2013-4
RE_COI_135	0	0	0	0	0	0	0	0	0	0	3	5	2	0	0	0	0	0	6	0	0	1	0	6	0	0	0	0	0	0	0	0	0	0	0	0	k__Metazoa; p__Arthropoda; c__Insecta; o__Coleoptera; f__Chrysomelidae; g__Oocassida; s__Oocassida_pudibunda
RE_COI_136	5	0	4	0	0	2	0	0	0	0	0	0	0	0	0	0	0	0	0	0	0	0	0	0	0	0	0	0	0	0	0	0	0	0	0	0	k__Metazoa; p__Arthropoda; c__Insecta; o__Coleoptera; f__Chrysomelidae; g__Pachnephorus; s__Pachnephorus_laevicollis
RE_COI_137	0	0	0	0	2	0	0	0	0	0	1	0	0	0	0	0	0	0	0	0	0	0	0	0	0	0	0	2	0	0	3	11	1	0	0	0	k__Metazoa; p__Arthropoda; c__Insecta; o__Coleoptera; f__Chrysomelidae; g__Prasocuris; s__Prasocuris_junci
RE_COI_138	0	0	0	0	0	0	0	0	4	0	4	0	8	0	0	0	0	0	164	88	0	144	0	0	0	0	0	0	7	0	0	0	3	1	0	0	k__Metazoa; p__Arthropoda; c__Insecta; o__Coleoptera; f__Chrysomelidae; g__unidentified; s__Chrysomelidae_sp._C12001
RE_COI_139	0	1	0	0	0	0	0	0	0	2	8	10	28	5	0	0	0	0	0	2	0	0	0	0	0	0	0	0	0	0	0	0	0	0	0	0	k__Metazoa; p__Arthropoda; c__Insecta; o__Coleoptera; f__Chrysomelidae; g__unidentified; s__Galerucinae_sp._3_BT-2014
RE_COI_140	0	0	0	0	0	0	0	0	0	1	2	1	2	0	0	0	0	0	0	0	0	0	0	0	0	0	0	0	0	0	0	0	0	0	0	0	k__Metazoa; p__Arthropoda; c__Insecta; o__Coleoptera; f__Ciidae; g__Orthocis; s__Orthocis_nigrosplendidus
RE_COI_141	0	0	0	0	5	14	0	0	0	0	0	0	0	0	0	0	0	0	0	0	0	0	0	0	0	0	0	0	0	0	0	0	0	0	0	0	k__Metazoa; p__Arthropoda; c__Insecta; o__Coleoptera; f__Curculionidae; g__Hyledius; s__Hyledius_vilis
RE_COI_142	0	0	0	0	0	0	0	0	0	0	0	0	0	0	0	0	0	0	5	0	0	0	0	0	0	0	0	0	0	0	0	0	0	0	0	0	k__Metazoa; p__Arthropoda; c__Insecta; o__Coleoptera; f__Derodontidae; g__Laricobius; s__Laricobius_erichsoni
RE_COI_143	0	0	0	0	0	0	0	0	0	0	0	0	0	0	0	0	0	0	4	0	0	0	0	0	0	0	0	0	0	0	0	0	0	0	0	0	k__Metazoa; p__Arthropoda; c__Insecta; o__Coleoptera; f__Dytiscidae; g__Prodaticus; s__Prodaticus_grammicus
RE_COI_144	0	0	0	0	0	1	0	2	1	182	351	425	282	76	0	0	0	0	1	1	0	25	7	15	0	0	403	2	2	4	0	0	0	1	0	0	k__Metazoa; p__Arthropoda; c__Insecta; o__Coleoptera; f__Dytiscidae; g__Rhantus; s__Rhantus_suturalis
RE_COI_145	0	0	0	0	0	0	0	0	0	0	1	2	1	0	0	0	0	0	0	0	0	0	0	0	0	0	0	0	0	0	0	0	0	0	0	0	k__Metazoa; p__Arthropoda; c__Insecta; o__Coleoptera; f__Geotrupidae; g__Geotrupes; s__Geotrupes_mutator
RE_COI_146	293	176	187	0	315	266	0	389	431	12	0	0	1	0	0	0	0	0	0	0	0	0	0	0	0	0	0	0	0	0	0	0	0	1	2	2	k__Metazoa; p__Arthropoda; c__Insecta; o__Coleoptera; f__Hydraenidae; g__Hydraena; s__Hydraena_sp._MNCN_AI429
RE_COI_147	0	0	0	0	0	0	0	0	0	15	14	11	1	2	0	0	0	0	0	0	0	0	0	0	0	0	0	0	0	0	0	0	0	0	0	0	k__Metazoa; p__Arthropoda; c__Insecta; o__Coleoptera; f__Kateretidae; g__Kateretes; s__Kateretes_pedicularius
RE_COI_148	0	0	0	0	0	0	0	0	0	0	2	0	0	0	0	0	0	0	0	0	0	0	0	0	0	0	0	0	0	0	0	0	0	0	0	0	k__Metazoa; p__Arthropoda; c__Insecta; o__Coleoptera; f__Lampyridae; g__Luciola; s__Luciola_parvula
RE_COI_149	0	0	0	0	0	0	0	0	0	0	2	68	1	1	0	0	0	0	0	0	0	0	0	1	0	0	0	0	0	0	0	0	0	0	0	0	k__Metazoa; p__Arthropoda; c__Insecta; o__Coleoptera; f__Latridiidae; g__unidentified; s__Latridiidae_sp._BOLD:AAN5905
RE_COI_150	0	0	0	0	0	0	0	0	0	0	0	0	0	0	0	0	0	0	0	0	0	0	0	0	0	0	0	0	0	0	2	0	0	0	0	0	k__Metazoa; p__Arthropoda; c__Insecta; o__Coleoptera; f__Scarabaeidae; g__Anomala; s__Anomala_dubia
RE_COI_151	0	0	0	0	0	0	0	0	5	0	0	0	0	0	0	0	0	0	0	0	0	0	0	0	0	0	0	0	0	0	0	0	0	0	0	0	k__Metazoa; p__Arthropoda; c__Insecta; o__Coleoptera; f__Scarabaeidae; g__Nanos; s__Nanos_sp._9_AM-2013
RE_COI_152	0	0	0	0	0	0	0	0	0	0	0	0	0	8	0	0	0	0	0	0	0	0	0	0	0	0	0	0	0	0	0	0	0	0	0	0	k__Metazoa; p__Arthropoda; c__Insecta; o__Coleoptera; f__Staphylinidae; g__Carpelimus; s__Carpelimus_similis
RE_COI_153	0	0	0	0	0	0	0	0	0	0	0	0	0	9	0	0	0	0	0	0	0	0	0	0	0	0	0	0	0	0	0	0	0	0	0	0	k__Metazoa; p__Arthropoda; c__Insecta; o__Coleoptera; f__Staphylinidae; g__Ochthephilus; s__Ochthephilus_omalinus
RE_COI_154	0	0	0	14	0	0	2	0	0	0	0	0	0	0	0	0	0	0	0	0	0	0	0	0	0	0	0	0	0	0	0	0	0	0	0	0	k__Metazoa; p__Arthropoda; c__Insecta; o__Coleoptera; f__Staphylinidae; g__Renardia; s__Renardia_nigrella
RE_COI_155	0	0	0	0	0	0	0	1	3	365	4	150	0	1	0	0	0	0	0	0	0	0	0	0	0	0	0	0	0	0	0	0	0	1	0	0	k__Metazoa; p__Arthropoda; c__Insecta; o__Coleoptera; f__Staphylinidae; g__Stenus; s__Stenus_pilosiventris
RE_COI_156	0	0	0	0	0	0	0	0	0	0	10	9	8	1472	0	0	0	0	0	0	0	2	0	0	0	0	0	0	0	0	0	0	0	1	0	0	k__Metazoa; p__Arthropoda; c__Insecta; o__Coleoptera; f__Staphylinidae; g__unidentified; s__Staphylinidae_sp._BMNH_1274226
RE_COI_157	0	0	0	0	0	0	0	0	0	3	7	9	10	2	0	0	0	0	35	0	0	1	0	0	0	0	0	0	0	0	0	0	0	0	0	0	k__Metazoa; p__Arthropoda; c__Insecta; o__Coleoptera; f__Tenebrionidae; g__Eleodes; s__Eleodes_caseyi
RE_COI_158	0	0	0	0	0	0	0	0	0	16	40	6	9	6	0	0	0	0	29	0	0	0	0	0	0	0	0	0	0	0	0	0	0	0	0	0	k__Metazoa; p__Arthropoda; c__Insecta; o__Coleoptera; f__Tenebrionidae; g__Eleodes; s__Eleodes_caseyi
RE_COI_159	1	1	0	0	0	0	0	0	0	0	0	0	0	0	0	0	0	0	0	0	0	0	0	0	0	0	0	0	0	0	0	0	0	0	0	0	k__Metazoa; p__Arthropoda; c__Insecta; o__Diptera; f__Agromyzidae; g__Aulagromyza; s__Aulagromyza_sp._BOLD:ACF6229
RE_COI_160	0	0	0	0	0	0	0	105	106	2	0	0	0	0	0	0	0	0	0	0	0	0	0	0	0	0	0	0	0	0	0	0	0	0	0	0	k__Metazoa; p__Arthropoda; c__Insecta; o__Diptera; f__Agromyzidae; g__Chromatomyia; s__Chromatomyia_fuscula
RE_COI_161	0	0	0	0	0	0	0	0	0	0	0	0	0	0	0	0	0	0	3	0	0	0	0	0	0	0	0	0	0	0	0	0	0	0	0	0	k__Metazoa; p__Arthropoda; c__Insecta; o__Diptera; f__Agromyzidae; g__Chromatomyia; s__Chromatomyia_nr._luzulae
RE_COI_162	87	51	135	0	13	10	0	6	2	0	0	0	0	0	0	0	0	0	0	0	0	0	0	0	0	0	1	0	0	0	0	0	0	0	1	0	k__Metazoa; p__Arthropoda; c__Insecta; o__Diptera; f__Agromyzidae; g__Phytoliriomyza; s__Phytoliriomyza_arctica
RE_COI_163	0	0	0	0	0	0	0	0	0	5	18	1	3	0	0	0	0	0	0	0	0	0	0	0	0	0	0	0	0	0	0	0	0	0	0	0	k__Metazoa; p__Arthropoda; c__Insecta; o__Diptera; f__Agromyzidae; g__unidentified; s__Agromyzidae_sp._BOLD:ACB0506
RE_COI_164	0	0	0	0	0	0	0	2	0	0	0	0	0	0	0	0	0	0	2	1	0	0	0	0	0	0	0	0	0	0	0	0	0	0	0	0	k__Metazoa; p__Arthropoda; c__Insecta; o__Diptera; f__Agromyzidae; g__unidentified; s__Agromyzidae_sp._BOLD:ACB2476
RE_COI_165	0	0	0	0	0	0	0	0	0	0	2	0	1	0	0	0	0	0	0	0	0	0	0	0	0	0	0	0	0	0	0	0	0	0	0	0	k__Metazoa; p__Arthropoda; c__Insecta; o__Diptera; f__Agromyzidae; g__unidentified; s__Agromyzidae_sp._BOLD:ACC5435
RE_COI_166	0	1	7	0	0	0	0	3	0	2	0	0	0	0	0	0	0	0	0	0	0	0	0	0	0	0	0	0	0	0	0	0	0	0	0	0	k__Metazoa; p__Arthropoda; c__Insecta; o__Diptera; f__Agromyzidae; g__unidentified; s__Agromyzidae_sp._BOLD-2016
RE_COI_167	0	0	0	0	0	0	0	0	0	0	0	0	0	0	0	0	0	0	0	0	0	0	0	0	0	0	1	70	1	0	0	0	0	0	0	0	k__Metazoa; p__Arthropoda; c__Insecta; o__Diptera; f__Anthomyiidae; g__Pegomya; s__Pegomya_circumpolaris
RE_COI_168	0	0	0	0	0	0	0	0	0	0	0	0	0	0	0	0	0	0	7	0	0	0	0	0	0	0	0	0	0	0	0	0	0	0	0	0	k__Metazoa; p__Arthropoda; c__Insecta; o__Diptera; f__Asilidae; g__Dysmachus; s__Dysmachus_trigonus
RE_COI_169	0	0	0	0	0	0	0	0	0	0	3	4	0	0	0	0	0	0	0	0	0	0	0	0	0	0	0	0	0	0	0	0	0	0	0	0	k__Metazoa; p__Arthropoda; c__Insecta; o__Diptera; f__Asilidae; g__Philonicus; s__Philonicus_plebeius
RE_COI_170	4	0	7	0	0	0	0	0	0	0	0	0	0	0	0	0	0	0	0	0	0	0	0	0	0	0	0	0	0	0	0	0	0	0	1	0	k__Metazoa; p__Arthropoda; c__Insecta; o__Diptera; f__Cecidomyiidae; g__Ozirhincus; s__Ozirhincus_millefolii
RE_COI_171	0	0	0	0	0	0	0	0	0	2	14	5	0	0	0	0	0	0	0	0	0	0	0	0	0	0	0	0	0	0	0	0	0	0	0	0	k__Metazoa; p__Arthropoda; c__Insecta; o__Diptera; f__Cecidomyiidae; g__unidentified; s__Cecidomyiidae_sp._BOLD:ACB7218
RE_COI_172	0	0	0	0	0	0	0	0	0	1	1	21	20	11	0	0	0	0	1	0	0	0	0	0	0	0	2	0	0	0	0	0	0	0	0	0	k__Metazoa; p__Arthropoda; c__Insecta; o__Diptera; f__Cecidomyiidae; g__unidentified; s__Cecidomyiidae_sp._BOLD:ACE1140
RE_COI_173	0	0	0	0	0	0	0	0	0	0	11	0	1	0	0	0	0	0	0	0	0	0	0	0	0	0	0	0	0	0	0	0	0	0	0	0	k__Metazoa; p__Arthropoda; c__Insecta; o__Diptera; f__Cecidomyiidae; g__unidentified; s__Cecidomyiidae_sp._BOLD:ACI6245
RE_COI_174	0	0	0	0	9	1	0	0	0	0	0	0	0	0	0	0	0	0	0	0	0	0	0	0	0	0	0	0	0	0	0	0	0	0	0	0	k__Metazoa; p__Arthropoda; c__Insecta; o__Diptera; f__Cecidomyiidae; g__unidentified; s__Cecidomyiidae_sp._BOLD:ACM6249
RE_COI_175	0	0	0	0	7	1	0	0	0	0	0	0	0	0	0	0	0	0	0	0	0	0	0	0	0	0	0	0	0	0	0	0	0	0	0	0	k__Metazoa; p__Arthropoda; c__Insecta; o__Diptera; f__Cecidomyiidae; g__unidentified; s__Cecidomyiidae_sp._BOLD:ACN5722
RE_COI_176	0	1	8	0	0	0	0	0	0	0	0	0	0	0	0	0	0	0	0	0	0	0	0	0	0	0	0	0	0	0	0	0	0	0	0	0	k__Metazoa; p__Arthropoda; c__Insecta; o__Diptera; f__Ceratopogonidae; g__Atrichopogon; s__Atrichopogon_sp._BOLD-2016
RE_COI_177	0	0	0	0	0	0	0	0	0	1	2	3	6	0	0	0	0	0	2	0	0	8	10	62	0	0	2	45	130	98	270	245	85	63	8	20	k__Metazoa; p__Arthropoda; c__Insecta; o__Diptera; f__Ceratopogonidae; g__Atrichopogon; s__Atrichopogon_sp._BOLD-2016
RE_COI_178	0	0	0	0	0	0	0	0	0	0	0	1	0	0	0	0	0	0	0	0	0	0	0	0	0	0	1	0	0	0	1383	11	2	6	0	0	k__Metazoa; p__Arthropoda; c__Insecta; o__Diptera; f__Ceratopogonidae; g__Culicoides; s__Culicoides_circumscriptus
RE_COI_179	0	0	0	0	0	0	0	0	0	0	0	0	4	0	0	0	0	0	0	0	0	0	0	0	0	0	0	0	0	0	0	0	0	0	0	0	k__Metazoa; p__Arthropoda; c__Insecta; o__Diptera; f__Ceratopogonidae; g__Culicoides; s__Culicoides_peregrinus
RE_COI_180	0	0	0	0	0	0	0	0	0	0	0	0	0	0	0	0	0	0	0	0	0	0	0	0	0	0	1	17	0	0	0	0	0	0	0	0	k__Metazoa; p__Arthropoda; c__Insecta; o__Diptera; f__Ceratopogonidae; g__Culicoides; s__Culicoides_sp._BOLD-2016
RE_COI_181	0	0	0	0	0	0	0	0	0	3	0	0	0	0	0	0	0	0	0	0	0	0	0	0	0	0	0	0	0	0	0	0	0	0	0	0	k__Metazoa; p__Arthropoda; c__Insecta; o__Diptera; f__Ceratopogonidae; g__Forcipomyia; s__Forcipomyia_bikanni
RE_COI_182	0	0	0	0	0	0	0	0	0	0	0	38	1	0	0	0	0	0	0	0	0	0	0	0	0	0	0	0	0	0	0	0	0	0	0	0	k__Metazoa; p__Arthropoda; c__Insecta; o__Diptera; f__Ceratopogonidae; g__Forcipomyia; s__Forcipomyia_sp._BOLD-2016
RE_COI_183	0	0	0	0	0	0	0	0	0	0	1	0	48	1	0	0	0	0	0	0	0	0	0	0	0	0	0	0	0	0	0	0	0	0	0	0	k__Metazoa; p__Arthropoda; c__Insecta; o__Diptera; f__Ceratopogonidae; g__Forcipomyia; s__Forcipomyia_sp._BOLD-2016
RE_COI_184	1	3	2	0	0	0	0	0	0	0	0	0	0	0	0	0	0	0	0	0	0	0	0	0	0	0	0	0	0	0	0	0	0	0	0	0	k__Metazoa; p__Arthropoda; c__Insecta; o__Diptera; f__Ceratopogonidae; g__unidentified; s__Ceratopogonidae_sp._BOLD:ACB0486
RE_COI_185	1	0	0	0	0	0	0	18	19	0	0	0	0	0	0	0	0	0	0	0	0	0	0	0	0	0	0	0	0	0	0	0	0	0	0	0	k__Metazoa; p__Arthropoda; c__Insecta; o__Diptera; f__Ceratopogonidae; g__unidentified; s__Ceratopogonidae_sp._BOLD:ACG8210
RE_COI_186	2	0	0	0	0	0	0	0	0	0	0	6	0	0	0	0	0	0	0	0	0	0	0	0	0	0	0	0	0	0	0	0	0	0	0	0	k__Metazoa; p__Arthropoda; c__Insecta; o__Diptera; f__Chamaemyiidae; g__unidentified; s__Chamaemyiidae_sp._BOLD:AAP9013
RE_COI_187	0	0	0	0	0	0	0	0	0	0	0	0	0	0	0	0	0	0	0	0	0	0	0	0	0	0	0	0	0	0	84	3	0	2	0	0	k__Metazoa; p__Arthropoda; c__Insecta; o__Diptera; f__Chironomidae; g__Chironomus; s__Chironomus_cf._plumosus_1_JC-2015
RE_COI_188	0	0	1	0	0	0	0	0	1	0	0	0	0	0	0	0	0	0	0	0	0	0	0	0	0	0	0	0	0	0	77	0	0	0	0	0	k__Metazoa; p__Arthropoda; c__Insecta; o__Diptera; f__Chironomidae; g__Chironomus; s__Chironomus_cf._plumosus_3_JC-2015
RE_COI_189	0	0	0	0	0	0	0	0	0	0	0	0	0	0	0	0	0	0	0	0	0	0	0	0	0	0	0	0	7	0	0	4	0	0	0	0	k__Metazoa; p__Arthropoda; c__Insecta; o__Diptera; f__Chironomidae; g__Chironomus; s__Chironomus_nippodorsalis
RE_COI_190	0	0	0	0	0	0	0	0	0	0	0	0	0	0	0	0	0	0	0	0	0	0	0	0	0	0	0	13	0	0	0	0	0	0	0	0	k__Metazoa; p__Arthropoda; c__Insecta; o__Diptera; f__Chironomidae; g__Chironomus; s__Chironomus_riparius
RE_COI_191	0	0	0	0	0	0	0	0	0	0	0	0	0	0	0	0	0	0	0	5	0	0	0	0	0	0	0	0	0	0	0	26	9	1	0	0	k__Metazoa; p__Arthropoda; c__Insecta; o__Diptera; f__Chironomidae; g__Chironomus; s__Chironomus_yoshimatsui
RE_COI_192	0	0	0	0	0	0	0	3	0	0	0	0	0	0	0	0	0	0	0	4	0	128	26	194	0	0	2	1	0	9	3	24	0	0	0	0	k__Metazoa; p__Arthropoda; c__Insecta; o__Diptera; f__Chironomidae; g__Cricotopus; s__Cricotopus_bicinctus
RE_COI_193	0	0	0	0	0	0	0	2	0	0	0	0	0	0	0	0	0	0	0	0	0	0	0	0	0	0	8	0	0	1	0	0	0	0	0	0	k__Metazoa; p__Arthropoda; c__Insecta; o__Diptera; f__Chironomidae; g__Cricotopus; s__Cricotopus_bimaculatus
RE_COI_194	0	0	0	0	0	0	0	0	0	0	0	0	0	0	0	0	0	0	0	0	0	0	0	0	0	0	3	133	1	0	0	1	0	0	0	0	k__Metazoa; p__Arthropoda; c__Insecta; o__Diptera; f__Chironomidae; g__Cricotopus; s__Cricotopus_ornatus
RE_COI_195	0	0	0	0	0	0	0	0	0	0	0	0	0	0	0	0	0	0	0	0	0	0	0	0	0	0	3	0	0	0	0	0	0	0	0	0	k__Metazoa; p__Arthropoda; c__Insecta; o__Diptera; f__Chironomidae; g__Cricotopus; s__Cricotopus_tasmania
RE_COI_196	0	0	0	0	0	0	0	23	22	1	1	0	0	0	0	0	0	0	0	0	0	0	0	12	0	0	54	0	0	0	0	0	0	0	9	0	k__Metazoa; p__Arthropoda; c__Insecta; o__Diptera; f__Chironomidae; g__Cricotopus; s__Cricotopus_triannulatus
RE_COI_197	0	0	0	0	0	0	0	5	5	0	0	0	0	0	0	0	0	0	0	0	0	0	0	0	0	0	0	0	0	0	0	0	0	0	0	0	k__Metazoa; p__Arthropoda; c__Insecta; o__Diptera; f__Chironomidae; g__Cricotopus; s__Cricotopus_trifascia
RE_COI_198	6	1	4	0	0	0	0	0	0	0	5	0	0	0	0	0	0	0	0	0	0	0	0	0	0	0	4	29	128	172	34	22	1019	7	0	0	k__Metazoa; p__Arthropoda; c__Insecta; o__Diptera; f__Chironomidae; g__Cricotopus; s__Cricotopus_trifasciatus
RE_COI_199	0	0	0	0	0	0	0	0	1	0	0	0	0	0	0	0	0	0	0	0	0	0	1	24	0	0	0	0	0	0	0	0	0	0	0	0	k__Metazoa; p__Arthropoda; c__Insecta; o__Diptera; f__Chironomidae; g__Diamesa; s__Diamesa_goetghebueri
RE_COI_200	0	0	0	0	0	0	0	0	0	0	0	0	0	0	0	0	0	0	1	1	0	54	306	6	0	0	3	0	0	0	1	0	0	1	0	0	k__Metazoa; p__Arthropoda; c__Insecta; o__Diptera; f__Chironomidae; g__Diamesa; s__Diamesa_zernyi
RE_COI_201	0	0	0	0	31	31	0	2	1	0	0	0	4	0	0	0	0	0	0	0	0	0	0	0	0	0	0	0	0	0	0	0	0	0	0	0	k__Metazoa; p__Arthropoda; c__Insecta; o__Diptera; f__Chironomidae; g__Dicrotendipes; s__Dicrotendipes_nervosus
RE_COI_202	0	0	0	0	0	0	0	0	0	0	0	0	0	0	0	0	0	0	0	6	0	3	2	24	0	0	4	24	56	6	26	38	5	8	2	5	k__Metazoa; p__Arthropoda; c__Insecta; o__Diptera; f__Chironomidae; g__Eukiefferiella; s__Eukiefferiella_sp._SK-2011
RE_COI_203	174	150	101	0	0	2	0	0	0	0	0	0	0	0	0	0	0	0	0	0	0	0	0	0	0	0	1	0	0	0	0	0	0	0	2	4	k__Metazoa; p__Arthropoda; c__Insecta; o__Diptera; f__Chironomidae; g__Glyptotendipes; s__Glyptotendipes_tokunagai
RE_COI_204	0	39	5	0	11	19	0	17	5	127	240	127	69	31	0	0	0	0	1769	1661	0	312	306	777	0	0	6104	3677	1147	1219	5458	5161	1696	433	139	951	k__Metazoa; p__Arthropoda; c__Insecta; o__Diptera; f__Chironomidae; g__Hydrobaenus; s__Hydrobaenus_kondoi
RE_COI_205	0	0	0	0	0	4	0	0	0	0	0	0	0	0	0	0	0	0	0	0	0	0	0	0	0	0	0	0	0	0	0	0	0	0	0	0	k__Metazoa; p__Arthropoda; c__Insecta; o__Diptera; f__Chironomidae; g__Kiefferulus; s__Kiefferulus_tainanus
RE_COI_206	2	0	3	0	6	7	0	0	2	0	0	0	0	0	0	0	0	0	0	0	0	0	0	0	0	0	0	0	0	0	0	0	0	0	0	0	k__Metazoa; p__Arthropoda; c__Insecta; o__Diptera; f__Chironomidae; g__Limnophyes; s__Limnophyes_aagaardi
RE_COI_207	1	1	0	0	3	8	0	0	0	0	0	0	0	0	0	0	0	0	0	0	0	0	0	0	0	0	0	0	0	0	0	0	0	0	0	0	k__Metazoa; p__Arthropoda; c__Insecta; o__Diptera; f__Chironomidae; g__Microchironomus; s__Microchironomus_tener
RE_COI_208	20	12	30	0	0	0	0	0	0	0	0	0	0	0	0	0	0	0	0	0	0	0	0	0	0	0	0	0	0	0	0	0	0	0	0	3	k__Metazoa; p__Arthropoda; c__Insecta; o__Diptera; f__Chironomidae; g__Microchironomus; s__Microchironomus_tener
RE_COI_209	0	0	0	0	0	0	0	8	24	0	3	0	97	1	0	0	0	0	0	0	0	0	2	7	0	0	7	0	0	0	7	0	0	9	9	0	k__Metazoa; p__Arthropoda; c__Insecta; o__Diptera; f__Chironomidae; g__Nanocladius; s__Nanocladius_tamabicolor
RE_COI_210	0	3	0	0	0	0	0	4	0	0	0	0	1	0	0	0	0	0	0	0	0	0	0	5	0	0	0	0	0	0	9	0	0	0	4	438	k__Metazoa; p__Arthropoda; c__Insecta; o__Diptera; f__Chironomidae; g__Nanocladius; s__Nanocladius_tamabicolor
RE_COI_211	0	4	0	0	0	0	0	6	5	0	0	0	0	2	0	0	0	0	0	1	0	0	4	3	0	0	44	48	1	0	0	0	0	0	333	167	k__Metazoa; p__Arthropoda; c__Insecta; o__Diptera; f__Chironomidae; g__Nanocladius; s__Nanocladius_tamabicolor
RE_COI_212	0	0	0	0	0	0	0	4	2	1	0	0	0	0	0	0	0	0	0	0	0	0	1	0	0	0	36	0	0	0	0	0	0	0	0	0	k__Metazoa; p__Arthropoda; c__Insecta; o__Diptera; f__Chironomidae; g__Orthocladius; s__Orthocladius_sp._BOLD:AAN4803
RE_COI_213	0	0	0	0	0	0	0	0	0	0	0	0	0	0	0	0	0	0	0	0	0	0	0	0	0	0	0	0	0	0	0	1	0	0	42	0	k__Metazoa; p__Arthropoda; c__Insecta; o__Diptera; f__Chironomidae; g__Orthocladius; s__Orthocladius_sp._BOLD:AAV5071
RE_COI_214	0	0	0	0	0	0	0	0	0	0	0	0	0	0	0	0	0	0	0	0	0	0	0	0	0	0	0	0	0	0	0	1	0	0	1	68	k__Metazoa; p__Arthropoda; c__Insecta; o__Diptera; f__Chironomidae; g__Orthocladius; s__Orthocladius_sp._BOLD-2016
RE_COI_215	0	11	0	0	0	0	0	0	0	3	0	0	0	1	0	0	0	0	12	17	0	75	35	149	0	0	72	932	739	1136	497	140	35	151	67	223	k__Metazoa; p__Arthropoda; c__Insecta; o__Diptera; f__Chironomidae; g__Orthocladius; s__Orthocladius_sp._BOLD-2016
RE_COI_216	0	0	0	0	0	0	0	0	0	2	1	3	2	0	0	0	0	0	3	0	0	2	0	4	0	0	0	0	0	0	0	0	0	0	0	0	k__Metazoa; p__Arthropoda; c__Insecta; o__Diptera; f__Chironomidae; g__Orthocladius; s__Orthocladius_sp._TE13
RE_COI_217	0	0	0	0	0	0	0	0	0	0	0	0	0	0	0	0	0	0	0	0	0	0	0	0	0	0	3	0	80	0	0	23	0	25	0	1	k__Metazoa; p__Arthropoda; c__Insecta; o__Diptera; f__Chironomidae; g__Orthocladius; s__Orthocladius_sp._'yugashimaeusis'
RE_COI_218	0	0	0	0	0	0	0	0	0	0	0	0	0	0	0	0	0	0	0	0	0	0	0	0	0	0	0	0	0	0	1	1	0	27	0	0	k__Metazoa; p__Arthropoda; c__Insecta; o__Diptera; f__Chironomidae; g__Parachironomus; s__Parachironomus_frequens
RE_COI_219	0	0	0	0	0	0	0	0	0	0	0	0	0	0	0	0	0	0	7	0	0	2	1	0	0	0	0	3	19	2	2	13	0	0	0	0	k__Metazoa; p__Arthropoda; c__Insecta; o__Diptera; f__Chironomidae; g__Paratrichocladius; s__Paratrichocladius_rufiventris
RE_COI_220	0	0	0	0	0	0	0	0	0	0	0	0	0	0	0	0	0	0	0	0	0	1	1	3	0	0	14	1643	6	169	0	1	0	0	0	2	k__Metazoa; p__Arthropoda; c__Insecta; o__Diptera; f__Chironomidae; g__Polypedilum; s__Polypedilum_cultellatum
RE_COI_221	0	0	0	0	0	0	0	0	0	0	0	0	0	0	0	0	0	0	0	0	0	0	0	0	0	0	0	1	0	0	26	0	0	1	0	0	k__Metazoa; p__Arthropoda; c__Insecta; o__Diptera; f__Chironomidae; g__Polypedilum; s__Polypedilum_nubeculosum
RE_COI_222	0	0	0	0	0	0	0	0	0	0	0	0	0	0	0	0	0	0	0	0	0	0	0	0	0	0	147	0	3	0	0	0	0	0	1	0	k__Metazoa; p__Arthropoda; c__Insecta; o__Diptera; f__Chironomidae; g__Polypedilum; s__Polypedilum_sp._BOLD-2016
RE_COI_223	10	3	14	0	0	0	0	0	0	0	0	0	0	0	0	0	0	0	0	0	0	0	0	0	0	0	0	0	0	0	0	0	0	0	0	0	k__Metazoa; p__Arthropoda; c__Insecta; o__Diptera; f__Chironomidae; g__Polypedilum; s__Polypedilum_unagiquartum
RE_COI_224	0	0	0	0	0	0	0	0	0	0	0	0	0	0	0	0	0	0	0	0	0	0	0	0	0	0	0	9	6	0	1	50	0	0	0	0	k__Metazoa; p__Arthropoda; c__Insecta; o__Diptera; f__Chironomidae; g__Procladius; s__Procladius_sp._BOLD:AAG3918
RE_COI_225	0	0	0	0	0	0	0	0	0	0	0	0	0	0	0	0	0	0	0	0	0	0	2	2	0	0	183	4	0	0	1	0	0	1	0	0	k__Metazoa; p__Arthropoda; c__Insecta; o__Diptera; f__Chironomidae; g__Rheocricotopus; s__Rheocricotopus_chalybeatus
RE_COI_226	0	0	0	0	0	0	0	0	0	1	0	0	0	0	0	0	0	0	0	0	0	1	1	0	0	0	0	0	0	0	0	0	0	0	0	0	k__Metazoa; p__Arthropoda; c__Insecta; o__Diptera; f__Chironomidae; g__Rheocricotopus; s__Rheocricotopus_effusus
RE_COI_227	0	0	0	0	0	0	0	0	0	0	94	15	0	2	0	0	0	0	0	0	0	0	0	0	0	0	0	0	0	0	0	0	0	0	0	24	k__Metazoa; p__Arthropoda; c__Insecta; o__Diptera; f__Chironomidae; g__Smittia; s__Smittia_sp._ES12
RE_COI_228	0	0	0	0	0	0	0	0	0	0	0	0	28	1	0	0	0	0	0	0	0	0	0	0	0	0	0	0	0	0	0	0	0	0	0	0	k__Metazoa; p__Arthropoda; c__Insecta; o__Diptera; f__Chironomidae; g__Tanytarsus; s__Tanytarsus_formosanus
RE_COI_229	0	1	0	0	0	0	0	0	0	0	1	0	27	0	0	0	0	0	0	0	0	0	0	0	0	0	0	3	6	1	42	16	1	10	13	13	k__Metazoa; p__Arthropoda; c__Insecta; o__Diptera; f__Chironomidae; g__Tanytarsus; s__Tanytarsus_okuboi
RE_COI_230	0	0	0	0	0	0	0	0	0	0	0	1	4	33	0	0	0	0	0	0	0	0	0	0	0	0	0	0	0	0	0	0	0	0	0	0	k__Metazoa; p__Arthropoda; c__Insecta; o__Diptera; f__Chironomidae; g__Tokunagayusurika; s__Tokunagayusurika_akamusi
RE_COI_231	0	0	0	0	0	0	0	0	0	0	0	0	0	0	0	0	0	0	0	0	0	0	0	0	0	0	0	0	9	0	0	0	0	0	0	0	k__Metazoa; p__Arthropoda; c__Insecta; o__Diptera; f__Chironomidae; g__unidentified; s__Chironomidae_sp._BOLD:AAD7251
RE_COI_232	0	0	0	0	0	0	0	3	7	0	0	0	0	0	0	0	0	0	0	0	0	0	3	2	0	0	5	0	0	2	1	0	0	1	0	0	k__Metazoa; p__Arthropoda; c__Insecta; o__Diptera; f__Chironomidae; g__unidentified; s__Chironomidae_sp._BOLD:ACC1090
RE_COI_233	0	185	0	0	1	2	0	133	78	21	13	23	232	27	0	0	0	0	2	1	0	7	347	240	0	0	3484	102	311	234	33	18	62	567	723	2280	k__Metazoa; p__Arthropoda; c__Insecta; o__Diptera; f__Chironomidae; g__unidentified; s__Chironomidae_sp._BOLD:ACC8266
RE_COI_234	0	0	0	0	0	0	0	0	0	9	24	47	15	2	0	0	0	0	0	0	0	0	0	4	0	0	1	0	0	0	0	0	0	0	0	0	k__Metazoa; p__Arthropoda; c__Insecta; o__Diptera; f__Chironomidae; g__unidentified; s__Chironomidae_sp._BOLD:ACG7151
RE_COI_235	0	0	0	0	0	0	0	0	0	0	0	0	0	0	0	0	0	0	0	0	0	0	0	0	0	0	0	0	0	0	0	0	0	0	0	11	k__Metazoa; p__Arthropoda; c__Insecta; o__Diptera; f__Chloropidae; g__Chlorops; s__Chlorops_oryzae
RE_COI_236	0	0	0	0	0	0	0	0	0	0	1	1	2	0	0	0	0	0	1	0	0	1	0	0	0	0	0	0	0	0	0	0	0	0	0	0	k__Metazoa; p__Arthropoda; c__Insecta; o__Diptera; f__Culicidae; g__Aedes; s__Aedes_sp._BOLD:AAA3750
RE_COI_237	0	0	0	0	0	0	0	0	0	1	4	0	0	0	0	0	0	0	0	0	0	0	0	0	0	0	0	0	0	0	0	0	0	0	0	0	k__Metazoa; p__Arthropoda; c__Insecta; o__Diptera; f__Culicidae; g__Anopheles; s__Anopheles_karwari
RE_COI_238	0	0	0	0	0	0	0	0	0	0	0	0	0	10	0	0	0	0	2	0	0	2	6	3	0	0	0	1	4	14	8	0	0	0	2	0	k__Metazoa; p__Arthropoda; c__Insecta; o__Diptera; f__Culicidae; g__Anopheles; s__Anopheles_neivai
RE_COI_239	0	0	0	0	0	0	0	0	0	0	0	0	0	0	0	0	0	0	0	0	0	0	0	1	0	0	4	247	297	1	0	0	0	0	0	0	k__Metazoa; p__Arthropoda; c__Insecta; o__Diptera; f__Culicidae; g__Anopheles; s__Anopheles_sawyeri
RE_COI_240	0	0	0	0	0	0	0	0	0	56	0	0	0	0	0	0	0	0	0	0	0	0	0	0	0	0	0	0	0	0	0	0	0	0	0	0	k__Metazoa; p__Arthropoda; c__Insecta; o__Diptera; f__Culicidae; g__Culex; s__Culex_quinquefasciatus
RE_COI_241	0	0	0	0	0	0	0	0	0	0	0	0	0	0	0	0	0	0	0	0	0	0	0	1	0	0	0	0	0	0	0	0	0	0	0	31	k__Metazoa; p__Arthropoda; c__Insecta; o__Diptera; f__Culicidae; g__unidentified; s__Culicidae_sp._BOLD:ACG3697
RE_COI_242	0	1	0	0	32	34	0	0	0	0	0	0	0	0	0	0	0	0	0	0	0	0	0	0	0	0	0	0	0	0	0	0	0	0	0	0	k__Metazoa; p__Arthropoda; c__Insecta; o__Diptera; f__Cylindrotomidae; g__Cylindrotoma; s__Cylindrotoma_distinctissima
RE_COI_243	0	0	0	0	0	0	0	0	0	0	0	0	16	3	0	0	0	0	0	0	0	0	0	1	0	0	250	2	1	1	0	0	0	0	2	0	k__Metazoa; p__Arthropoda; c__Insecta; o__Diptera; f__Drosophilidae; g__Leucophenga; s__Leucophenga_sp._11_HWC-2013
RE_COI_244	0	0	0	0	0	0	0	1	1	40	3	0	0	0	0	0	0	0	0	0	0	1	0	0	0	0	0	0	0	0	0	0	0	0	0	0	k__Metazoa; p__Arthropoda; c__Insecta; o__Diptera; f__Ephydridae; g__Scatella; s__Scatella_sp._BOLD-2016
RE_COI_245	0	0	0	0	0	0	0	41	37	0	0	0	0	0	0	0	0	0	0	0	0	0	1	11	0	0	0	0	0	0	0	0	0	0	0	2	k__Metazoa; p__Arthropoda; c__Insecta; o__Diptera; f__Ephydridae; g__Setacera; s__Setacera_micans
RE_COI_246	0	0	0	0	0	0	0	0	0	2	3	4	0	0	0	0	0	0	0	0	0	0	0	0	0	0	0	0	0	0	0	0	0	0	0	0	k__Metazoa; p__Arthropoda; c__Insecta; o__Diptera; f__Hybotidae; g__Drapetis; s__Drapetis_sp._AB42406431
RE_COI_247	0	0	0	0	11	4	0	0	0	0	0	0	0	0	0	0	0	0	0	0	0	0	0	0	0	0	0	0	0	0	0	0	0	0	0	0	k__Metazoa; p__Arthropoda; c__Insecta; o__Diptera; f__Limoniidae; g__Limonia; s__Limonia_sp._BOLD:AAI1356
RE_COI_248	0	0	0	0	0	0	0	0	0	0	0	0	0	0	0	0	0	0	0	0	0	0	0	0	0	0	1	350	25	0	1	1	0	0	1	8	k__Metazoa; p__Arthropoda; c__Insecta; o__Diptera; f__Lonchaeidae; g__Neosilba; s__Neosilba_zadolicha
RE_COI_249	0	0	0	0	0	0	0	1	0	2	0	4	0	0	0	0	0	0	0	1	0	0	0	3	0	0	58	13490	231	72	2	8	0	21	7	9	k__Metazoa; p__Arthropoda; c__Insecta; o__Diptera; f__Lonchaeidae; g__Neosilba; s__Neosilba_zadolicha
RE_COI_250	0	0	0	0	0	0	0	0	0	0	308	3	3	3	0	0	0	0	0	0	0	0	0	0	0	0	0	0	0	0	0	0	0	0	0	0	k__Metazoa; p__Arthropoda; c__Insecta; o__Diptera; f__Muscidae; g__Schoenomyza; s__Schoenomyza_sp._BOLD:AAG1777
RE_COI_251	0	0	0	0	0	0	0	0	0	0	0	0	0	0	0	0	0	0	5	0	0	0	0	0	0	0	0	0	0	0	0	0	0	0	0	0	k__Metazoa; p__Arthropoda; c__Insecta; o__Diptera; f__Mycetophilidae; g__Brevicornu; s__Brevicornu_sp._CJB07
RE_COI_252	0	0	0	0	0	0	0	0	0	0	0	0	0	0	0	0	0	0	0	0	0	0	0	0	0	0	0	0	0	0	35	67	9	0	0	0	k__Metazoa; p__Arthropoda; c__Insecta; o__Diptera; f__Mycetophilidae; g__Epicypta; s__Epicypta_sp._BOLD:ACI3894
RE_COI_253	0	0	0	0	0	0	0	0	0	5	23	16	12	3	0	0	0	0	145	19	0	0	0	0	0	0	0	0	0	2	0	0	0	0	0	0	k__Metazoa; p__Arthropoda; c__Insecta; o__Diptera; f__Mycetophilidae; g__Epicypta; s__Epicypta_sp._BOLD-2016
RE_COI_254	0	0	0	0	0	1	0	0	0	0	1	0	0	0	0	0	0	0	0	0	0	0	0	0	0	0	1	0	1	3	1	1	1	0	0	0	k__Metazoa; p__Arthropoda; c__Insecta; o__Diptera; f__Mycetophilidae; g__Exechia; s__Exechia_subfrigida
RE_COI_255	7	1	0	0	0	0	0	0	0	0	0	0	0	0	0	0	0	0	0	1	0	0	0	0	0	0	0	0	1	0	4	0	0	0	0	0	k__Metazoa; p__Arthropoda; c__Insecta; o__Diptera; f__Mycetophilidae; g__Mycetophila; s__Mycetophila_sp._BOLD:AAP6483
RE_COI_256	0	1	1	0	0	0	0	0	0	0	0	0	0	0	0	0	0	0	0	0	0	0	0	0	0	0	0	0	0	0	0	0	0	0	1	0	k__Metazoa; p__Arthropoda; c__Insecta; o__Diptera; f__Mycetophilidae; g__Mycomya; s__Mycomya_sp._BOLD:ACD8883
RE_COI_257	0	0	0	0	0	0	0	0	0	0	5	1	0	0	0	0	0	0	0	0	0	0	0	0	0	0	0	0	0	0	0	0	0	0	0	0	k__Metazoa; p__Arthropoda; c__Insecta; o__Diptera; f__Mycetophilidae; g__unidentified; s__Mycetophilidae_sp._BOLD:ACI4958
RE_COI_258	0	0	0	0	0	0	0	0	0	0	0	0	0	0	0	0	0	0	0	0	0	0	0	0	0	0	0	0	0	0	4	3	1	0	0	0	k__Metazoa; p__Arthropoda; c__Insecta; o__Diptera; f__Mycetophilidae; g__unidentified; s__Mycetophilidae_sp._BOLD-2016
RE_COI_259	0	7	0	0	0	0	0	0	1	7	17	4	0	13	0	0	0	0	161	22	0	506	282	289	0	0	37	247	454	571	706	1004	428	98	65	175	k__Metazoa; p__Arthropoda; c__Insecta; o__Diptera; f__Mycetophilidae; g__unidentified; s__Mycetophilinae_sp._BOLD-2016
RE_COI_260	1	0	4	0	0	0	0	0	0	0	0	0	0	0	0	0	0	0	0	0	0	0	0	0	0	0	0	0	0	1	0	0	0	0	0	0	k__Metazoa; p__Arthropoda; c__Insecta; o__Diptera; f__Mycetophilidae; g__Zygomyia; s__Zygomyia_zaitzevi
RE_COI_261	0	0	0	0	0	0	0	0	0	1	1	0	0	0	0	0	0	0	1	0	0	0	0	1	0	0	0	0	0	0	0	0	0	0	0	0	k__Metazoa; p__Arthropoda; c__Insecta; o__Diptera; f__Phoridae; g__Megaselia; s__Megaselia_sp._BOLD:ACC3448
RE_COI_262	0	0	0	0	0	0	0	0	1	1	9	4	20	4	0	0	0	0	0	0	0	0	0	0	0	0	0	0	0	0	0	0	0	0	0	0	k__Metazoa; p__Arthropoda; c__Insecta; o__Diptera; f__Phoridae; g__unidentified; s__Phoridae_sp._BOLD:ACE6414
RE_COI_263	0	0	0	0	0	0	0	37	28	1	0	0	0	0	0	0	0	0	0	0	0	6	0	0	0	0	0	0	0	0	0	0	0	0	1	0	k__Metazoa; p__Arthropoda; c__Insecta; o__Diptera; f__Psychodidae; g__Lutzomyia; s__Lutzomyia_vexator
RE_COI_264	0	0	0	0	0	0	0	0	0	0	0	0	0	0	0	0	0	0	19	0	0	0	0	0	0	0	0	0	0	0	0	0	0	0	0	0	k__Metazoa; p__Arthropoda; c__Insecta; o__Diptera; f__Psychodidae; g__Psychoda; s__Psychoda_alternata
RE_COI_265	0	0	0	0	0	0	0	0	0	0	0	3	0	0	0	0	0	0	0	0	0	0	0	0	0	0	0	0	0	0	0	0	0	0	0	0	k__Metazoa; p__Arthropoda; c__Insecta; o__Diptera; f__Psychodidae; g__Psychoda; s__Psychoda_sp._BOLD-2016
RE_COI_266	0	0	0	0	0	0	0	1	1	47	6	1	1	0	0	0	0	0	0	0	0	0	0	0	0	0	0	0	0	0	0	0	0	0	0	0	k__Metazoa; p__Arthropoda; c__Insecta; o__Diptera; f__Psychodidae; g__Psychoda; s__Psychoda_sp._BOLD-2016
RE_COI_267	0	0	0	0	0	0	0	0	0	0	3	0	0	0	0	0	0	0	0	0	0	0	0	0	0	0	0	0	0	0	0	0	0	0	0	0	k__Metazoa; p__Arthropoda; c__Insecta; o__Diptera; f__Psychodidae; g__unidentified; s__Psychodidae_sp._BOLD-2016
RE_COI_268	0	0	0	0	0	0	0	0	0	6	28	11	18	4	0	0	0	0	6	0	0	0	0	0	0	0	0	0	0	0	0	0	0	0	0	0	k__Metazoa; p__Arthropoda; c__Insecta; o__Diptera; f__Psychodidae; g__unidentified; s__Psychodidae_sp._BOLD-2016
RE_COI_269	0	0	4	0	0	0	0	2	4	0	0	0	1	0	0	0	0	0	2	0	0	1	1	0	0	0	0	0	0	0	0	0	0	0	0	0	k__Metazoa; p__Arthropoda; c__Insecta; o__Diptera; f__Rhinophoridae; g__unidentified; s__Rhinophoridae_gen._sp._AT-2015
RE_COI_270	1	0	0	0	0	0	0	0	0	0	0	0	0	0	0	0	0	0	0	0	0	0	0	0	0	0	0	0	0	0	0	0	5	0	0	0	k__Metazoa; p__Arthropoda; c__Insecta; o__Diptera; f__Sarcophagidae; g__Sarcophaga; s__Sarcophaga_albiceps
RE_COI_271	0	0	0	0	0	0	0	0	0	1	1	53	0	25	0	0	0	0	0	0	0	0	0	0	0	0	0	0	0	0	0	0	0	0	0	0	k__Metazoa; p__Arthropoda; c__Insecta; o__Diptera; f__Sciaridae; g__Bradysia; s__Bradysia_brevispina
RE_COI_272	0	0	0	0	0	0	0	0	0	0	0	0	0	33	0	0	0	0	0	0	0	0	0	0	0	0	0	0	0	0	0	0	0	0	0	0	k__Metazoa; p__Arthropoda; c__Insecta; o__Diptera; f__Sciaridae; g__Bradysia; s__Bradysia_sp._2_nr._ocellaris_SS-2014
RE_COI_273	0	0	0	0	0	0	0	0	0	0	0	66	0	1	0	0	0	0	0	0	0	0	0	0	0	0	0	0	0	0	0	0	0	0	0	0	k__Metazoa; p__Arthropoda; c__Insecta; o__Diptera; f__Sciaridae; g__Lycoriella; s__Lycoriella_sp._BOLD-2016
RE_COI_274	0	0	0	0	0	0	0	0	0	0	0	0	0	0	0	0	0	0	0	0	0	0	0	0	0	0	0	1	1	2	3	16	17	4	2	3	k__Metazoa; p__Arthropoda; c__Insecta; o__Diptera; f__Sciaridae; g__unidentified; s__Sciaridae_sp._BOLD:ACC6811
RE_COI_275	0	2	0	0	6	0	0	1	0	0	0	0	0	0	0	0	0	0	0	0	0	0	0	0	0	0	0	0	0	0	0	0	0	0	0	0	k__Metazoa; p__Arthropoda; c__Insecta; o__Diptera; f__Sciaridae; g__unidentified; s__Sciaridae_sp._BOLD:ACC7091
RE_COI_276	0	0	0	0	0	0	0	0	0	11	3	13	1	3	0	0	0	0	0	0	0	0	0	0	0	0	0	0	0	0	0	0	0	0	0	0	k__Metazoa; p__Arthropoda; c__Insecta; o__Diptera; f__Sciomyzidae; g__Dictya; s__Dictya_sp._TAW1
RE_COI_277	0	0	0	0	0	0	0	0	0	4	29	7	0	0	0	0	0	0	0	0	0	0	0	0	0	0	0	0	0	0	0	0	0	0	0	0	k__Metazoa; p__Arthropoda; c__Insecta; o__Diptera; f__Sciomyzidae; g__Dictya; s__Dictya_sp._TAW1
RE_COI_278	0	0	0	0	0	0	0	0	0	2	2	1	3	1	0	0	0	0	224	0	0	2	0	0	0	0	0	0	0	0	0	0	0	0	0	0	k__Metazoa; p__Arthropoda; c__Insecta; o__Diptera; f__Sepsidae; g__Themira; s__Themira_maculitarsis
RE_COI_279	9	8	19	0	0	0	0	0	0	0	0	0	0	0	0	0	0	0	0	0	0	0	0	0	0	0	0	0	0	0	0	0	0	0	0	0	k__Metazoa; p__Arthropoda; c__Insecta; o__Diptera; f__Simuliidae; g__Gigantodax; s__Gigantodax_willei
RE_COI_280	0	0	0	0	0	0	0	0	0	1	1	1	0	0	0	0	0	0	0	0	0	1	0	0	0	0	0	0	0	0	0	0	0	0	0	0	k__Metazoa; p__Arthropoda; c__Insecta; o__Diptera; f__Simuliidae; g__Simulium; s__Simulium_hieroglyphicum
RE_COI_281	0	9	1	0	1	0	0	0	0	0	1	0	1	2	0	0	0	0	0	1	0	4	7	50	0	0	8	32	118	57	341	416	1056	331	157	181	k__Metazoa; p__Arthropoda; c__Insecta; o__Diptera; f__Simuliidae; g__Simulium; s__Simulium_marilogense
RE_COI_282	0	0	0	0	0	0	0	0	0	0	0	0	0	0	0	0	0	0	0	0	0	0	0	0	0	0	0	0	0	0	0	0	0	0	0	29	k__Metazoa; p__Arthropoda; c__Insecta; o__Diptera; f__Tachinidae; g__Lespesia; s__Lespesia_sp._Janzen15
RE_COI_283	27	38	32	0	14	13	0	0	0	1	0	0	0	0	0	0	0	0	0	0	0	0	0	0	0	0	0	0	0	0	0	0	0	0	1	0	k__Metazoa; p__Arthropoda; c__Insecta; o__Diptera; f__Tachinidae; g__Phytomyptera; s__Phytomyptera_sp._Wood03
RE_COI_284	0	0	0	0	0	0	0	2	4	0	0	0	0	0	0	0	0	0	0	0	0	0	0	0	0	0	0	0	0	0	0	0	0	0	0	0	k__Metazoa; p__Arthropoda; c__Insecta; o__Diptera; f__Tipulidae; g__unidentified; s__Tipulidae_sp._BOLD-2016
RE_COI_285	0	0	0	0	0	0	0	0	0	0	0	0	0	0	0	0	0	0	7	0	0	0	0	0	0	0	0	0	0	0	0	0	0	0	0	0	k__Metazoa; p__Arthropoda; c__Insecta; o__Diptera; f__unidentified; g__unidentified; s__Diptera_sp._BOLD:AAN1429
RE_COI_286	0	0	0	0	0	0	0	0	0	2	7	14	1	1	0	0	0	0	0	0	0	0	0	0	0	0	0	0	0	0	0	0	0	0	0	0	k__Metazoa; p__Arthropoda; c__Insecta; o__Ephemeroptera; f__Oligoneuriidae; g__Lachlania; s__Lachlania_sp._Ep5639c
RE_COI_287	0	0	0	0	0	4	0	0	0	0	0	0	0	0	0	0	0	0	0	0	0	0	0	0	0	0	0	0	0	0	0	0	0	0	0	0	k__Metazoa; p__Arthropoda; c__Insecta; o__Ephemeroptera; f__unidentified; g__unidentified; s__Ephemeroptera_sp._SHSY141215a
RE_COI_288	0	0	0	0	0	0	0	0	0	0	0	2	0	2	0	0	0	0	0	0	0	0	0	0	0	0	0	0	0	0	0	0	0	0	0	0	k__Metazoa; p__Arthropoda; c__Insecta; o__Hemiptera; f__Aleyrodidae; g__unidentified; s__Aleyrodidae_sp._BOLD-2016
RE_COI_289	1	0	2	0	0	0	0	0	0	1	2	3	0	0	0	0	0	0	0	0	0	0	0	0	0	0	0	0	0	1	0	0	0	0	0	0	k__Metazoa; p__Arthropoda; c__Insecta; o__Hemiptera; f__Aphrophoridae; g__unidentified; s__Aphrophoridae_sp._AY-2013
RE_COI_290	0	0	0	0	0	0	0	0	0	1	1	2	2	0	0	0	0	0	0	0	0	0	0	0	0	0	0	0	0	0	0	0	0	0	0	0	k__Metazoa; p__Arthropoda; c__Insecta; o__Hemiptera; f__Cicadellidae; g__Empoasca; s__Empoasca_sp._BOLD-2016
RE_COI_291	0	0	6	0	0	0	0	0	0	0	0	0	0	0	0	0	0	0	0	0	0	0	0	0	0	0	0	0	0	0	0	0	0	0	0	0	k__Metazoa; p__Arthropoda; c__Insecta; o__Hemiptera; f__Cicadellidae; g__Empoasca; s__Empoasca_sp._BOLD-2016
RE_COI_292	0	0	16	0	0	0	0	0	0	0	0	1	0	0	0	0	0	0	2	0	0	0	0	0	0	0	0	0	0	0	0	0	0	0	0	0	k__Metazoa; p__Arthropoda; c__Insecta; o__Hemiptera; f__Cicadellidae; g__Errhomus; s__Errhomus_serratus
RE_COI_293	0	0	0	0	0	0	0	0	0	0	0	0	0	2	0	0	0	0	0	0	0	0	0	0	0	0	0	0	0	0	0	0	0	0	0	0	k__Metazoa; p__Arthropoda; c__Insecta; o__Hemiptera; f__Cicadellidae; g__Scaphoideus; s__Scaphoideus_carinatus
RE_COI_294	9	4	18	0	0	0	0	0	0	6	0	9	0	0	0	0	0	0	0	0	0	0	0	0	0	0	1	10	0	2	1	0	0	0	0	1	k__Metazoa; p__Arthropoda; c__Insecta; o__Hemiptera; f__Machaerotidae; g__Hindoloides; s__Hindoloides_bipunctata
RE_COI_295	0	0	0	0	2	0	0	6	0	0	0	0	0	0	0	0	0	0	0	0	0	0	0	0	0	0	0	0	0	0	2	3	0	0	0	0	k__Metazoa; p__Arthropoda; c__Insecta; o__Hemiptera; f__Membracidae; g__Aconophora; s__Aconophora_marginata
RE_COI_296	0	0	0	0	0	0	0	0	0	0	0	3	2	0	0	0	0	0	4	0	0	0	0	0	0	0	0	0	0	0	0	0	0	0	0	0	k__Metazoa; p__Arthropoda; c__Insecta; o__Hemiptera; f__Mesoveliidae; g__Austrovelia; s__Austrovelia_caledonica
RE_COI_297	0	0	0	0	0	0	0	0	0	0	0	0	0	0	0	0	0	0	0	0	0	0	0	0	0	0	0	0	0	10	0	0	0	0	0	0	k__Metazoa; p__Arthropoda; c__Insecta; o__Hemiptera; f__Micronectidae; g__Micronecta; s__Micronecta_sp._BOLD:ACG1960
RE_COI_298	0	0	0	0	0	0	0	0	0	0	97	0	0	0	0	0	0	0	0	0	0	0	0	0	0	0	1	0	0	18	0	0	0	0	0	0	k__Metazoa; p__Arthropoda; c__Insecta; o__Hemiptera; f__Micronectidae; g__Micronecta; s__Micronecta_sp._BOLD:ACG1960
RE_COI_299	0	0	0	0	0	0	0	0	0	0	103	0	0	0	0	0	0	0	0	0	0	0	0	0	0	0	1	0	0	28	0	0	0	0	0	0	k__Metazoa; p__Arthropoda; c__Insecta; o__Hemiptera; f__Miridae; g__Litomiris; s__Litomiris_debilis
RE_COI_300	0	0	0	0	0	0	0	0	0	0	473	4	0	4	0	0	0	0	0	0	0	0	0	0	0	0	0	0	0	0	0	93	0	0	0	0	k__Metazoa; p__Arthropoda; c__Insecta; o__Hemiptera; f__Notonectidae; g__Enithares; s__Enithares_tibialis
RE_COI_301	0	0	0	0	0	0	0	0	0	0	0	0	1	0	0	0	0	0	19	0	0	0	1	0	0	0	0	0	0	0	0	0	0	0	0	0	k__Metazoa; p__Arthropoda; c__Insecta; o__Hemiptera; f__Notonectidae; g__Notonecta; s__Notonecta_borealis
RE_COI_302	0	0	2	0	0	0	0	0	0	0	10868	30	26	60	0	0	0	0	3	0	0	0	1	0	0	0	59	3	0	903	0	0	0	0	0	0	k__Metazoa; p__Arthropoda; c__Insecta; o__Hemiptera; f__Notonectidae; g__Notonecta; s__Notonecta_maculata
RE_COI_303	0	0	0	0	0	0	0	0	0	0	10	1	0	1	0	0	0	0	0	0	0	0	0	0	0	0	0	0	0	0	0	0	0	0	0	0	k__Metazoa; p__Arthropoda; c__Insecta; o__Hymenoptera; f__Aphelinidae; g__Aphytis; s__Aphytis_africanus
RE_COI_304	0	0	0	0	0	0	0	0	0	3	0	0	0	0	0	0	0	0	0	0	0	0	0	0	0	0	0	0	0	0	0	0	0	0	0	0	k__Metazoa; p__Arthropoda; c__Insecta; o__Hymenoptera; f__Apidae; g__Halterapis; s__Halterapis_minuta
RE_COI_305	0	3	0	0	0	0	0	0	1	0	0	0	0	0	0	0	0	0	0	0	0	0	0	0	0	0	0	0	0	0	0	0	0	0	0	0	k__Metazoa; p__Arthropoda; c__Insecta; o__Hymenoptera; f__Braconidae; g__Bracon; s__Bracon_sp._BOLD-2016
RE_COI_306	0	0	0	0	0	0	0	0	0	0	0	0	0	0	0	0	0	0	0	0	0	0	0	0	0	0	0	0	0	0	0	2	0	0	0	0	k__Metazoa; p__Arthropoda; c__Insecta; o__Hymenoptera; f__Braconidae; g__Dacnusa; s__Dacnusa_sp._jft02
RE_COI_307	0	0	0	0	0	0	0	0	0	0	0	0	0	0	0	0	0	0	3	0	0	0	0	0	0	0	0	0	0	0	0	0	0	0	0	0	k__Metazoa; p__Arthropoda; c__Insecta; o__Hymenoptera; f__Braconidae; g__Diolcogaster; s__Diolcogaster_sp._jft50
RE_COI_308	0	0	1	0	6	0	0	0	0	0	0	0	0	0	0	0	0	0	0	0	0	0	0	0	0	0	0	0	0	0	0	0	0	0	0	0	k__Metazoa; p__Arthropoda; c__Insecta; o__Hymenoptera; f__Braconidae; g__Diolcogaster; s__unidentified
RE_COI_309	0	0	2	0	1	4	0	0	0	0	0	0	0	0	0	0	0	0	0	0	0	0	0	0	0	0	0	0	0	0	0	0	0	0	0	0	k__Metazoa; p__Arthropoda; c__Insecta; o__Hymenoptera; f__Braconidae; g__Meteorus; s__Meteorus_sp._congregatusDHJ02
RE_COI_310	84	51	59	0	42	41	0	13	8	0	0	0	0	0	0	0	0	0	0	0	0	0	0	0	0	0	0	0	0	0	0	0	0	0	0	0	k__Metazoa; p__Arthropoda; c__Insecta; o__Hymenoptera; f__Braconidae; g__Microplitis; s__Microplitis_sp._BOLD-2016
RE_COI_311	0	0	0	0	0	0	0	0	0	0	0	0	0	0	0	0	0	0	4	2	0	0	0	0	0	0	0	0	0	0	0	0	0	0	0	0	k__Metazoa; p__Arthropoda; c__Insecta; o__Hymenoptera; f__Braconidae; g__Pholetesor; s__Pholetesor_sp._jft04
RE_COI_312	0	0	0	0	0	0	0	13	4	0	0	0	0	0	0	0	0	0	0	0	0	0	0	0	0	0	0	0	0	0	0	0	0	0	0	0	k__Metazoa; p__Arthropoda; c__Insecta; o__Hymenoptera; f__Cynipidae; g__Synergus; s__Synergus_sp._2_ZA-2007
RE_COI_313	0	0	0	0	2	0	0	0	0	0	0	0	0	0	0	0	0	0	0	0	0	0	0	0	0	0	0	0	0	0	0	0	0	0	0	0	k__Metazoa; p__Arthropoda; c__Insecta; o__Hymenoptera; f__Eupelmidae; g__Brasema; s__Brasema_sp._31215
RE_COI_314	0	0	0	0	0	0	0	0	0	0	3	0	6	2	0	0	0	0	0	0	0	0	0	0	0	0	0	0	0	0	0	0	0	0	0	0	k__Metazoa; p__Arthropoda; c__Insecta; o__Hymenoptera; f__Formicidae; g__Nesomyrmex; s__Nesomyrmex_sp._MG04
RE_COI_315	0	0	0	0	0	0	0	0	0	0	0	0	0	0	0	0	0	0	0	0	0	0	0	0	0	0	0	0	0	0	6	1	0	0	0	1	k__Metazoa; p__Arthropoda; c__Insecta; o__Hymenoptera; f__Formicidae; g__Pristomyrmex; s__Pristomyrmex_bispinosus
RE_COI_316	0	0	0	0	0	0	0	0	0	0	0	0	0	0	0	0	0	0	15	0	0	0	0	0	0	0	0	0	0	0	0	0	0	0	0	0	k__Metazoa; p__Arthropoda; c__Insecta; o__Hymenoptera; f__Formicidae; g__Solenopsis; s__Solenopsis_geminata
RE_COI_317	0	0	0	0	0	0	0	0	0	0	0	0	0	0	0	0	0	0	0	0	0	0	0	0	0	0	0	0	0	0	0	2	0	0	0	0	k__Metazoa; p__Arthropoda; c__Insecta; o__Hymenoptera; f__Formicidae; g__Trichomyrmex; s__Trichomyrmex_destructor
RE_COI_318	0	0	0	0	0	0	0	1	2	0	0	0	0	0	0	0	0	0	0	2	0	2	0	12	0	0	113	2	0	0	4	0	12	0	0	0	k__Metazoa; p__Arthropoda; c__Insecta; o__Hymenoptera; f__Halictidae; g__Nomioides; s__Nomioides_minutissimus
RE_COI_319	0	0	0	0	0	0	0	0	0	0	0	0	11	1	0	0	0	0	0	0	0	0	0	0	0	0	0	0	0	0	0	0	0	0	0	0	k__Metazoa; p__Arthropoda; c__Insecta; o__Hymenoptera; f__Ichneumonidae; g__Ophion; s__Ophion_minutus
RE_COI_320	0	0	0	0	0	0	0	0	0	0	2	1	1	459	0	0	0	0	0	0	0	0	0	0	0	0	0	0	0	0	0	0	0	0	0	0	k__Metazoa; p__Arthropoda; c__Insecta; o__Hymenoptera; f__Ichneumonidae; g__unidentified; s__Mesochorinae_sp._BOLD:AAH0844
RE_COI_321	0	0	0	0	0	0	0	0	0	0	0	0	0	0	0	0	0	0	0	0	0	0	0	0	0	0	0	33	0	0	43	0	0	0	0	0	k__Metazoa; p__Arthropoda; c__Insecta; o__Hymenoptera; f__Megachilidae; g__Hoplitis; s__Hoplitis_leucomelana
RE_COI_322	0	0	6	0	0	0	0	0	0	0	0	0	3	0	0	0	0	0	0	0	0	0	0	0	0	0	0	1	0	0	1	3	0	0	0	0	k__Metazoa; p__Arthropoda; c__Insecta; o__Hymenoptera; f__Ormyridae; g__Ormyrus; s__Ormyrus_sp._1_JHX-2007
RE_COI_323	0	0	0	0	0	0	0	0	0	0	0	0	0	0	0	0	0	0	6	0	0	0	0	0	0	0	0	0	0	0	0	0	0	0	0	0	k__Metazoa; p__Arthropoda; c__Insecta; o__Hymenoptera; f__Sphecidae; g__Prionyx; s__Prionyx_viduatus
RE_COI_324	0	0	0	0	0	0	0	0	0	0	0	15	0	0	0	0	0	0	0	0	0	0	0	0	0	0	0	0	0	0	0	0	0	0	0	0	k__Metazoa; p__Arthropoda; c__Insecta; o__Hymenoptera; f__Tenthredinidae; g__Nematus; s__Nematus_sp._BOLD-2016
RE_COI_325	0	0	0	0	0	0	0	0	0	2	0	0	0	0	0	0	0	0	0	0	0	0	0	0	0	0	0	0	3	0	3	0	0	0	0	0	k__Metazoa; p__Arthropoda; c__Insecta; o__Hymenoptera; f__unidentified; g__unidentified; s__Hymenoptera_sp._ASAHY857-14
RE_COI_326	1	2	0	0	0	0	0	0	1	0	0	3	5	0	0	0	0	0	0	0	0	0	0	0	0	0	0	0	0	0	0	0	0	0	0	0	k__Metazoa; p__Arthropoda; c__Insecta; o__Lepidoptera; f__Crambidae; g__Conogethes; s__Conogethes_diminutiva
RE_COI_327	0	1	0	0	0	0	0	0	0	0	0	0	0	0	0	0	0	0	1	0	0	0	0	0	0	0	0	0	0	0	0	0	0	0	0	0	k__Metazoa; p__Arthropoda; c__Insecta; o__Lepidoptera; f__Crambidae; g__Desmia; s__Desmia_sp._bajulalisDHJ01
RE_COI_328	0	0	0	0	0	0	0	0	0	0	6	0	0	0	0	0	0	0	0	0	0	0	0	0	0	0	0	0	0	0	0	0	0	0	0	0	k__Metazoa; p__Arthropoda; c__Insecta; o__Lepidoptera; f__Elachistidae; g__Elachistidae_gen._elachJanzen01; s__Elachistidae_gen._elachJanzen01_sp._Janzen586
RE_COI_329	0	0	0	0	0	0	0	0	0	0	1	45	0	0	0	0	0	0	0	1	0	0	0	0	0	0	0	0	0	0	0	0	0	0	0	0	k__Metazoa; p__Arthropoda; c__Insecta; o__Lepidoptera; f__Elachistidae; g__Elachistidae_gen._elachJanzen01; s__Elachistidae_gen._elachJanzen01_sp._Janzen586
RE_COI_330	0	0	0	0	0	0	0	0	0	0	14	63	0	0	0	0	0	0	0	0	0	0	0	0	0	0	0	0	0	0	0	0	0	0	0	0	k__Metazoa; p__Arthropoda; c__Insecta; o__Lepidoptera; f__Elachistidae; g__Elachistidae_gen._elachJanzen01; s__Elachistidae_gen._elachJanzen01_sp._Janzen586
RE_COI_331	3	4	21	0	0	0	0	0	0	0	0	0	0	0	0	0	0	0	0	0	0	0	0	0	0	0	0	0	0	0	0	0	0	0	0	0	k__Metazoa; p__Arthropoda; c__Insecta; o__Lepidoptera; f__Erebidae; g__Balacra; s__Balacra_distincta
RE_COI_332	0	0	0	0	0	0	0	0	1	6	7	5	2	1	0	0	0	0	0	0	0	0	0	0	0	0	0	0	0	0	0	0	0	0	0	0	k__Metazoa; p__Arthropoda; c__Insecta; o__Lepidoptera; f__Erebidae; g__Dichromia; s__Dichromia_isogona
RE_COI_333	50	17	24	0	458	399	0	498	513	18	0	0	1	10	0	0	0	0	0	0	0	0	0	0	0	0	0	0	3	0	0	0	0	1	0	0	k__Metazoa; p__Arthropoda; c__Insecta; o__Lepidoptera; f__Erebidae; g__Soloe; s__Soloe_tripunctata
RE_COI_334	0	0	0	0	0	0	0	0	0	0	0	0	0	0	0	0	0	0	0	0	0	0	0	0	0	0	25	0	1	0	0	0	0	0	0	0	k__Metazoa; p__Arthropoda; c__Insecta; o__Lepidoptera; f__Gelechiidae; g__Scrobipalpa; s__Scrobipalpa_instabilella
RE_COI_335	3	8	6	0	1	0	0	0	0	0	0	0	0	0	0	0	0	0	2	13	0	82	48	10	0	0	4	18	36	27	362	547	1482	478	472	312	k__Metazoa; p__Arthropoda; c__Insecta; o__Lepidoptera; f__Gelechiidae; g__Stegasta; s__Stegasta_cosmodes
RE_COI_336	0	0	0	0	0	0	0	0	0	5	6	19	1	35	0	0	0	0	0	0	0	0	0	0	0	0	0	2	0	0	0	0	0	0	0	0	k__Metazoa; p__Arthropoda; c__Insecta; o__Lepidoptera; f__Gelechiidae; g__Xerometra; s__Xerometra_crocina
RE_COI_337	0	0	0	0	0	0	0	0	0	0	2	1	0	0	0	0	0	0	0	0	0	0	0	0	0	0	2	0	0	0	0	0	0	0	0	0	k__Metazoa; p__Arthropoda; c__Insecta; o__Lepidoptera; f__Geometridae; g__Crocallis; s__Crocallis_boisduvalaria
RE_COI_338	0	0	0	0	0	0	0	0	0	0	3	1	0	0	0	0	0	0	3	0	0	0	0	0	0	0	1	0	0	0	0	0	0	0	0	0	k__Metazoa; p__Arthropoda; c__Insecta; o__Lepidoptera; f__Geometridae; g__Oenochroma; s__Oenochroma_polyspila
RE_COI_339	0	0	0	0	0	0	0	0	0	0	0	0	0	0	0	0	0	0	2	0	0	0	0	0	0	0	0	0	0	0	0	0	0	0	0	0	k__Metazoa; p__Arthropoda; c__Insecta; o__Lepidoptera; f__Geometridae; g__Plagodis; s__Plagodis_serinaria
RE_COI_340	0	0	0	0	0	0	0	0	0	0	0	0	0	0	0	0	0	0	3	0	0	0	0	0	0	0	0	0	0	0	0	0	0	0	0	0	k__Metazoa; p__Arthropoda; c__Insecta; o__Lepidoptera; f__Geometridae; g__Telenomeuta; s__Telenomeuta_punctimarginaria
RE_COI_341	0	0	0	0	0	0	0	0	0	0	0	0	0	0	0	0	0	0	71	14	0	1	1	0	0	0	0	0	0	0	0	0	0	0	1	0	k__Metazoa; p__Arthropoda; c__Insecta; o__Lepidoptera; f__Geometridae; g__Trichodezia; s__Trichodezia_albovittata
RE_COI_342	0	0	0	0	0	0	0	7	9	0	0	0	0	0	0	0	0	0	0	0	0	0	0	0	0	0	0	0	0	0	0	0	0	0	0	0	k__Metazoa; p__Arthropoda; c__Insecta; o__Lepidoptera; f__Glyphipterigidae; g__Glyphipterix; s__Glyphipterix_circumscriptella
RE_COI_343	0	0	0	0	0	0	0	0	0	0	0	2	0	0	0	0	0	0	1	0	0	1	0	3	0	0	0	0	0	0	0	0	0	0	0	0	k__Metazoa; p__Arthropoda; c__Insecta; o__Lepidoptera; f__Hesperiidae; g__Caprona; s__Caprona_ransonnetii
RE_COI_344	82	30	76	0	73	63	0	1	8	0	0	0	8	1	0	0	0	0	0	0	0	0	0	0	0	0	0	0	0	0	0	0	0	0	0	0	k__Metazoa; p__Arthropoda; c__Insecta; o__Lepidoptera; f__Hesperiidae; g__Creonpyge; s__Creonpyge_creon
RE_COI_345	0	0	0	0	0	0	0	0	0	0	0	0	0	0	0	0	0	0	6	0	0	0	0	0	0	0	0	0	0	0	0	0	0	0	0	0	k__Metazoa; p__Arthropoda; c__Insecta; o__Lepidoptera; f__Hesperiidae; g__Urbanus; s__Urbanus_dorantes
RE_COI_346	0	0	0	0	0	0	0	0	0	3	21	13	8	3	0	0	0	0	1	0	0	0	0	0	0	0	0	0	0	0	0	0	0	0	0	0	k__Metazoa; p__Arthropoda; c__Insecta; o__Lepidoptera; f__Nepticulidae; g__Stigmella; s__Stigmella_sp._AphanantheTaiwan
RE_COI_347	0	0	0	0	0	0	0	0	0	0	1	1	0	0	0	0	0	0	4	0	0	0	0	0	0	0	0	0	0	0	0	0	0	0	0	0	k__Metazoa; p__Arthropoda; c__Insecta; o__Lepidoptera; f__Nepticulidae; g__Stigmella; s__Stigmella_sp._PourthiaeaTaiwan
RE_COI_348	7	14	0	0	1	3	0	0	0	0	0	0	0	0	0	0	0	0	0	0	0	0	0	0	0	0	0	0	0	0	0	0	0	0	0	0	k__Metazoa; p__Arthropoda; c__Insecta; o__Lepidoptera; f__Noctuidae; g__Amyna; s__Amyna_sp._octoDHJ02
RE_COI_349	0	0	0	0	0	0	0	0	0	3	11	3	0	0	0	0	0	0	0	0	0	0	0	0	0	0	0	0	0	0	0	0	0	0	0	0	k__Metazoa; p__Arthropoda; c__Insecta; o__Lepidoptera; f__Noctuidae; g__Coxina; s__Coxina_sp._'maxima'
RE_COI_350	0	0	0	0	0	0	0	0	0	1	5	4	1	0	0	0	0	0	0	0	0	0	0	0	0	0	0	0	0	0	0	0	0	0	0	0	k__Metazoa; p__Arthropoda; c__Insecta; o__Lepidoptera; f__Noctuidae; g__Cucullia; s__Cucullia_gnaphalii
RE_COI_351	0	0	5	0	0	0	0	0	0	0	0	0	0	0	0	0	0	0	0	0	0	0	0	0	0	0	0	0	0	0	0	0	0	0	0	0	k__Metazoa; p__Arthropoda; c__Insecta; o__Lepidoptera; f__Noctuidae; g__Diarsia; s__Diarsia_brunnea
RE_COI_352	0	0	3	0	0	2	0	0	0	0	0	0	0	0	0	0	0	0	0	0	0	0	0	0	0	0	0	0	0	0	0	0	0	0	0	0	k__Metazoa; p__Arthropoda; c__Insecta; o__Lepidoptera; f__Noctuidae; g__Eutrichopidia; s__Eutrichopidia_latinus
RE_COI_353	0	0	0	0	0	0	0	0	0	12	24	18	11	7	0	0	0	0	0	0	0	0	0	0	0	0	0	0	0	0	0	0	0	1	0	0	k__Metazoa; p__Arthropoda; c__Insecta; o__Lepidoptera; f__Noctuidae; g__Exyra; s__Exyra_fax
RE_COI_354	0	0	0	0	0	0	0	0	0	5	13	5	1	0	0	0	0	0	0	0	0	0	0	0	0	0	0	0	0	0	0	0	0	0	0	0	k__Metazoa; p__Arthropoda; c__Insecta; o__Lepidoptera; f__Noctuidae; g__Grammodes; s__Grammodes_sp._ANIC4
RE_COI_355	0	0	0	0	0	0	0	0	0	0	1	5	4	0	0	0	0	0	0	0	0	0	0	0	0	0	0	0	0	0	0	0	0	0	0	0	k__Metazoa; p__Arthropoda; c__Insecta; o__Lepidoptera; f__Nolidae; g__Lophothripa; s__Lophothripa_vitea
RE_COI_356	1	0	0	0	8	26	0	0	0	0	0	0	0	0	0	0	0	0	0	0	0	0	0	0	0	0	0	0	0	0	0	1	16	0	0	1	k__Metazoa; p__Arthropoda; c__Insecta; o__Lepidoptera; f__Nymphalidae; g__Bicyclus; s__Bicyclus_mollitia
RE_COI_357	0	0	0	0	0	0	0	0	1	117	0	4	112	31	0	0	0	0	0	0	0	0	0	0	0	0	0	0	18	0	0	0	0	0	0	0	k__Metazoa; p__Arthropoda; c__Insecta; o__Lepidoptera; f__Oecophoridae; g__Eulechria; s__Eulechria_syngenes
RE_COI_358	0	0	0	0	0	0	0	0	0	3	2	2	1	0	0	0	0	0	0	0	0	0	0	0	0	0	0	0	0	0	3	2	0	0	0	0	k__Metazoa; p__Arthropoda; c__Insecta; o__Lepidoptera; f__Oecophoridae; g__Hemibela; s__Hemibela_sp._ANIC1
RE_COI_359	0	0	0	0	0	0	0	0	0	0	0	0	0	0	0	0	0	0	0	0	0	2	17	1	0	0	0	0	0	0	0	0	0	0	0	0	k__Metazoa; p__Arthropoda; c__Insecta; o__Lepidoptera; f__Psychidae; g__Hyaloptila; s__Hyaloptila_melanosoma
RE_COI_360	0	0	0	0	3	1	0	0	0	0	0	0	0	0	0	0	0	0	0	0	0	0	0	0	0	0	0	0	0	0	0	0	0	0	0	0	k__Metazoa; p__Arthropoda; c__Insecta; o__Lepidoptera; f__Riodinidae; g__Mesosemia; s__Mesosemia_lamachus
RE_COI_361	0	0	0	0	0	0	0	0	0	4	13	17	3	1	0	0	0	0	0	0	0	0	0	0	0	0	0	0	0	0	0	0	0	0	0	0	k__Metazoa; p__Arthropoda; c__Insecta; o__Lepidoptera; f__Saturniidae; g__Lonomia; s__Lonomia_maranhensis
RE_COI_362	0	0	0	0	0	0	0	0	0	0	0	0	0	0	0	0	0	0	0	0	0	0	0	0	0	0	0	0	0	0	0	0	2	0	0	0	k__Metazoa; p__Arthropoda; c__Insecta; o__Lepidoptera; f__Saturniidae; g__Syssphinx; s__Syssphinx_parocellata
RE_COI_363	0	0	1	0	9	23	0	63	33	0	0	0	0	0	0	0	0	0	0	0	0	0	0	0	0	0	0	0	0	0	0	0	0	0	0	0	k__Metazoa; p__Arthropoda; c__Insecta; o__Lepidoptera; f__Sesiidae; g__Synanthedon; s__Synanthedon_bibionipennis
RE_COI_364	0	0	0	0	0	0	0	0	0	0	1	1	0	0	0	0	0	0	0	0	0	2	0	0	0	0	0	0	0	0	0	0	0	0	0	0	k__Metazoa; p__Arthropoda; c__Insecta; o__Lepidoptera; f__Sphingidae; g__Eumorpha; s__Eumorpha_sp._anchemolusDHJ03
RE_COI_365	0	0	0	0	0	0	0	88	28	1	0	0	1	0	0	0	0	0	69	10	0	0	4	0	0	0	0	21	1	4	57	349	6	2	0	0	k__Metazoa; p__Arthropoda; c__Insecta; o__Lepidoptera; f__unidentified; g__unidentified; s__Lepidoptera_sp._BOLD:AAA0267
RE_COI_366	47	28	35	0	1	2	0	2	1	0	0	0	0	0	0	0	0	0	0	0	0	0	0	0	0	0	0	0	0	0	0	0	0	0	0	0	k__Metazoa; p__Arthropoda; c__Insecta; o__Lepidoptera; f__unidentified; g__unidentified; s__Lepidoptera_sp._BOLD:AAB3904
RE_COI_367	142	102	69	0	171	181	0	24	21	0	0	0	0	0	0	0	0	0	0	0	0	0	0	0	0	0	0	0	0	0	0	0	0	0	1	0	k__Metazoa; p__Arthropoda; c__Insecta; o__Lepidoptera; f__Xyloryctidae; g__Cryptophasa; s__Cryptophasa_tetrazona
RE_COI_368	0	0	0	0	0	0	0	0	0	0	0	0	0	0	0	0	0	0	0	0	0	0	0	0	0	0	0	0	0	0	0	8	0	0	0	0	k__Metazoa; p__Arthropoda; c__Insecta; o__Lepidoptera; f__Xyloryctidae; g__Phthonerodes; s__Phthonerodes_peridela
RE_COI_369	0	0	0	0	0	0	0	0	0	7	39	68	8	5	0	0	0	0	0	1	0	0	1	0	0	0	0	0	0	0	0	0	0	0	0	0	k__Metazoa; p__Arthropoda; c__Insecta; o__Neuroptera; f__Myrmeleontidae; g__unidentified; s__Myrmeleontidae_sp._BOLD:ACI8732
RE_COI_370	0	0	0	0	0	0	0	0	0	2	2	1	0	1	0	0	0	0	5	1	0	0	0	0	0	0	0	0	0	0	0	0	0	0	0	0	k__Metazoa; p__Arthropoda; c__Insecta; o__Neuroptera; f__Osmylidae; g__Osmylus; s__Osmylus_fulvicephalus
RE_COI_371	5	1	7	0	0	0	0	10	0	0	0	0	0	0	0	0	0	0	0	0	0	0	0	0	0	0	0	0	0	0	0	0	0	0	0	1	k__Metazoa; p__Arthropoda; c__Insecta; o__Orthoptera; f__Acrididae; g__Acrida; s__Acrida_cinerea
RE_COI_372	0	0	0	0	0	0	0	0	0	2	0	4	1	0	0	0	0	0	0	0	0	0	0	10	0	0	0	0	0	0	2	0	0	0	0	0	k__Metazoa; p__Arthropoda; c__Insecta; o__Orthoptera; f__Acrididae; g__Aiolopus; s__Aiolopus_thalassinus
RE_COI_373	0	0	0	0	0	0	0	0	0	1	4	0	0	0	0	0	0	0	0	0	0	2	0	0	0	0	0	0	0	0	0	0	0	0	0	0	k__Metazoa; p__Arthropoda; c__Insecta; o__Orthoptera; f__Acrididae; g__Lithidiopsis; s__Lithidiopsis_sp._MJM-2010
RE_COI_374	0	0	0	0	0	0	0	0	0	0	0	0	0	0	0	0	0	0	5	0	0	0	0	0	0	0	0	0	0	0	0	0	0	0	0	0	k__Metazoa; p__Arthropoda; c__Insecta; o__Orthoptera; f__Acrididae; g__Locusta; s__Locusta_migratoria
RE_COI_375	0	0	0	0	0	0	0	0	0	0	1	3	10	1	0	0	0	0	0	0	0	0	0	0	0	0	0	0	0	0	0	0	0	0	0	0	k__Metazoa; p__Arthropoda; c__Insecta; o__Orthoptera; f__Acrididae; g__Oedaleus; s__Oedaleus_manjius
RE_COI_376	0	0	0	0	0	0	0	0	0	0	0	0	0	0	0	0	0	0	5	0	0	0	0	0	0	0	0	0	0	0	0	0	0	0	0	0	k__Metazoa; p__Arthropoda; c__Insecta; o__Orthoptera; f__Gryllotalpidae; g__Gryllotalpa; s__Gryllotalpa_orientalis
RE_COI_377	0	0	0	0	0	0	0	0	0	0	0	0	0	0	0	0	0	0	4	0	0	0	0	0	0	0	0	0	0	0	0	0	0	0	0	0	k__Metazoa; p__Arthropoda; c__Insecta; o__Orthoptera; f__Mogoplistidae; g__Ornebius; s__Ornebius_validus
RE_COI_378	0	0	0	0	0	0	0	0	1	43	29	2	7	0	0	0	0	0	0	0	0	0	0	0	0	0	0	0	0	0	0	0	0	0	0	0	k__Metazoa; p__Arthropoda; c__Insecta; o__Orthoptera; f__Tettigoniidae; g__Ruspolia; s__Ruspolia_dubia
RE_COI_379	0	2	0	0	0	0	0	0	0	0	0	0	0	0	0	0	0	0	0	0	0	0	0	0	0	0	0	0	0	0	0	0	0	0	0	0	k__Metazoa; p__Arthropoda; c__Insecta; o__Orthoptera; f__Tettigoniidae; g__Xizicus; s__Xizicus_howardi
RE_COI_380	0	0	0	0	0	0	0	1	0	61	131	15	1	2	0	0	0	0	0	0	0	0	0	0	0	0	0	0	0	0	0	0	0	0	0	0	k__Metazoa; p__Arthropoda; c__Insecta; o__Siphonaptera; f__Ceratophyllidae; g__Orchopeas; s__Orchopeas_caedens
RE_COI_381	0	0	0	0	0	0	0	0	0	1	7	2	38	2	0	0	0	0	0	0	0	0	0	0	0	0	0	0	0	0	0	0	0	0	0	0	k__Metazoa; p__Arthropoda; c__Insecta; o__Siphonaptera; f__Ischnopsyllidae; g__Myodopsylla; s__Myodopsylla_trisellis
RE_COI_382	0	0	0	0	0	0	0	0	0	2	1	0	2	0	0	0	0	0	0	0	0	0	0	0	0	0	0	0	0	0	0	0	0	0	0	0	k__Metazoa; p__Arthropoda; c__Insecta; o__Siphonaptera; f__Leptopsyllidae; g__Ochotonobius; s__Ochotonobius_hirticrus
RE_COI_383	0	1	3	0	0	0	0	0	0	0	0	0	0	0	0	0	0	0	0	0	0	0	0	0	0	0	0	0	0	0	0	0	0	0	0	0	k__Metazoa; p__Arthropoda; c__Insecta; o__Thysanoptera; f__Phlaeothripidae; g__Ananthakrishnana; s__Ananthakrishnana_euphorbiae
RE_COI_384	0	0	0	0	0	0	0	1	0	59	109	58	33	12	0	0	0	0	5	0	0	10	0	3	0	0	0	0	0	0	0	0	0	0	0	0	k__Metazoa; p__Arthropoda; c__Insecta; o__Thysanoptera; f__Phlaeothripidae; g__Haplothrips; s__Haplothrips_tenuipennis
RE_COI_385	0	0	0	0	0	0	0	0	0	0	6	2	0	0	0	0	0	0	0	0	0	0	0	0	0	0	0	0	0	0	0	0	0	0	0	0	k__Metazoa; p__Arthropoda; c__Insecta; o__Thysanoptera; f__Thripidae; g__Thrips; s__Thrips_nigropilosus
RE_COI_386	0	0	0	0	0	0	0	0	0	7	0	0	0	0	0	0	0	0	0	0	0	0	0	0	0	0	0	0	0	0	0	0	0	0	0	0	k__Metazoa; p__Arthropoda; c__Insecta; o__Thysanoptera; f__Thripidae; g__Thrips; s__Thrips_tabaci
RE_COI_387	0	0	0	0	0	0	0	0	0	0	9	2	0	0	0	0	0	0	0	0	0	0	0	0	0	0	0	0	0	0	0	0	0	0	0	0	k__Metazoa; p__Arthropoda; c__Insecta; o__Trichoptera; f__Glossosomatidae; g__Matrioptila; s__Matrioptila_jeanae
RE_COI_388	0	0	0	0	0	0	0	0	0	6	10	6	0	0	0	0	0	0	0	0	0	0	0	0	0	0	0	0	0	0	0	0	0	0	0	0	k__Metazoa; p__Arthropoda; c__Insecta; o__Trichoptera; f__Hydropsychidae; g__Austropsyche; s__Austropsyche_sp._EPAVT21
RE_COI_389	0	0	0	0	0	0	0	0	0	0	6	4	4	0	0	0	0	0	0	0	0	0	0	0	0	0	0	0	0	0	0	0	0	0	0	0	k__Metazoa; p__Arthropoda; c__Insecta; o__Trichoptera; f__Hydropsychidae; g__Potamyia; s__Potamyia_sp._gmycC14
RE_COI_390	0	0	0	0	0	0	0	21	18	1	0	0	0	0	0	0	0	0	0	0	0	0	0	0	0	0	0	0	0	0	0	0	0	0	0	0	k__Metazoa; p__Arthropoda; c__Insecta; o__Trichoptera; f__Hydroptilidae; g__Hydroptila; s__Hydroptila_angulata
RE_COI_391	0	0	0	0	0	0	0	0	0	0	0	0	1	0	0	0	0	0	4	0	0	0	0	0	0	0	0	0	0	0	0	0	0	0	0	0	k__Metazoa; p__Arthropoda; c__Insecta; o__Trichoptera; f__Hydroptilidae; g__Orthotrichia; s__Orthotrichia_lanna
RE_COI_392	0	0	0	0	0	0	0	0	0	0	0	0	0	0	0	0	0	0	5	0	0	0	0	0	0	0	0	0	0	0	0	0	0	0	0	0	k__Metazoa; p__Arthropoda; c__Insecta; o__Trichoptera; f__Leptoceridae; g__Oecetis; s__Oecetis_lacustris
RE_COI_393	0	0	0	0	0	0	0	12	33	0	0	0	0	0	0	0	0	0	0	0	0	0	0	0	0	0	0	0	0	0	0	0	0	0	0	0	k__Metazoa; p__Arthropoda; c__Insecta; o__Trichoptera; f__Polycentropodidae; g__Neucentropus; s__Neucentropus_mandjuricus
RE_COI_394	0	0	0	0	0	0	0	0	0	0	0	0	10	0	0	0	0	0	0	0	0	0	0	0	0	0	0	0	0	0	0	0	0	0	0	0	k__Metazoa; p__Arthropoda; c__Insecta; o__unidentified; f__unidentified; g__unidentified; s__Insecta_sp._SHSY141205
RE_COI_395	0	0	0	0	11	3	0	0	0	2	0	0	0	0	0	0	0	0	1	3	0	95	0	0	0	0	4	321	4	4361	0	0	0	0	0	0	k__Metazoa; p__Arthropoda; c__Malacostraca; o__Amphipoda; f__Anisogammaridae; g__Jesogammarus; s__Jesogammarus_hebeiensis
RE_COI_396	0	0	0	0	0	1	0	9	0	2	1	15	0	0	0	0	0	0	94	45543	0	771	0	9	0	0	4	576	6	1998	0	8	1	1	0	4	k__Metazoa; p__Arthropoda; c__Malacostraca; o__Amphipoda; f__Anisogammaridae; g__Jesogammarus; s__Jesogammarus_hebeiensis
RE_COI_397	1	3	7	0	3	0	0	1	0	0	0	0	0	0	0	0	0	0	0	0	0	0	0	0	0	0	0	0	0	0	0	0	0	0	0	0	k__Metazoa; p__Arthropoda; c__Malacostraca; o__Amphipoda; f__Hyalellidae; g__Hyalella; s__Hyalella_azteca
RE_COI_398	5	9	17	0	18	17	0	17	44	0	0	0	0	0	0	0	0	0	0	0	0	0	0	0	0	0	0	0	0	0	0	0	0	0	0	0	k__Metazoa; p__Arthropoda; c__Malacostraca; o__Amphipoda; f__Hyalellidae; g__Hyalella; s__Hyalella_azteca
RE_COI_399	58	64	23	0	5	9	0	5	7	0	0	0	0	0	0	0	0	0	0	0	0	0	0	0	0	0	0	0	0	0	0	0	1	0	0	0	k__Metazoa; p__Arthropoda; c__Malacostraca; o__Amphipoda; f__Hyalellidae; g__Hyalella; s__Hyalella_azteca
RE_COI_400	169	151	242	0	8	13	0	5	15	0	0	0	0	0	0	0	0	0	2	0	0	0	0	0	0	0	0	0	0	0	0	0	0	0	2	1	k__Metazoa; p__Arthropoda; c__Malacostraca; o__Amphipoda; f__Hyalellidae; g__Hyalella; s__Hyalella_azteca
RE_COI_401	0	0	15	0	2	0	0	0	0	0	0	0	0	0	0	0	0	0	0	0	0	0	0	0	0	0	0	0	0	0	0	0	0	0	0	0	k__Metazoa; p__Arthropoda; c__Malacostraca; o__Amphipoda; f__Niphargidae; g__Niphargus; s__Niphargus_karkabounasi
RE_COI_402	0	0	0	0	0	0	0	0	0	1	3	3	6	2	0	0	0	0	0	0	0	0	0	0	0	0	0	0	0	0	0	0	0	0	0	0	k__Metazoa; p__Arthropoda; c__Malacostraca; o__Amphipoda; f__Pontogammaridae; g__Pontogammarus; s__Pontogammarus_obesus
RE_COI_403	0	0	0	0	0	0	0	0	0	3	1	1	0	0	0	0	0	0	45	2	0	1	0	0	0	0	0	0	0	0	0	0	0	0	0	0	k__Metazoa; p__Arthropoda; c__Malacostraca; o__Amphipoda; f__Stenothoidae; g__unidentified; s__Stenothoidae_sp._31
RE_COI_404	0	0	0	0	0	0	0	0	0	2	2	0	0	0	0	0	0	0	4	0	0	0	0	0	0	0	0	0	0	0	0	0	0	0	0	0	k__Metazoa; p__Arthropoda; c__Malacostraca; o__Decapoda; f__Alpheidae; g__unidentified; s__Alpheidae_sp._PNG-0091b
RE_COI_405	0	0	2	0	0	2	0	0	1	11	43	15	38	8	0	0	0	0	1	0	0	1	2	0	0	0	8	0	0	0	0	0	0	0	0	0	k__Metazoa; p__Arthropoda; c__Malacostraca; o__Decapoda; f__Paguridae; g__Boninpagurus; s__Boninpagurus_pilosipes
RE_COI_406	1	0	0	0	0	0	0	0	0	0	1	0	0	51	0	0	0	0	0	0	0	0	0	0	0	0	0	0	0	0	0	1	0	0	0	0	k__Metazoa; p__Arthropoda; c__Malacostraca; o__Decapoda; f__Palaemonidae; g__Macrobrachium; s__Macrobrachium_asperulum
RE_COI_407	0	0	0	0	0	0	0	0	0	0	0	0	0	0	0	0	0	0	0	0	0	4	1	0	0	0	0	1	0	0	3	1	0	0	0	0	k__Metazoa; p__Arthropoda; c__Malacostraca; o__Decapoda; f__Pandalidae; g__Pandalopsis; s__Pandalopsis_coccinata
RE_COI_408	0	0	0	0	0	0	0	0	0	0	7	11	0	0	0	0	0	0	2	0	0	0	1	0	0	0	0	0	0	0	0	0	0	0	0	0	k__Metazoa; p__Arthropoda; c__Malacostraca; o__Decapoda; f__Panopeidae; g__Dyspanopeus; s__Dyspanopeus_sayi
RE_COI_409	1	3	22	0	1	5	0	0	0	0	0	0	0	0	0	0	0	0	0	0	0	0	0	0	0	0	0	0	0	0	0	0	0	0	0	0	k__Metazoa; p__Arthropoda; c__Malacostraca; o__Decapoda; f__Potamidae; g__Geothelphusa; s__Geothelphusa_ilan
RE_COI_410	0	0	0	0	0	0	0	0	0	3	5	10	0	0	0	0	0	0	0	0	0	0	0	0	0	0	0	0	0	0	1	0	0	0	0	0	k__Metazoa; p__Arthropoda; c__Malacostraca; o__Decapoda; f__Sesarmidae; g__Perisesarma; s__Perisesarma_guttatum
RE_COI_411	2	0	3	0	0	0	0	0	0	0	0	0	0	0	0	0	0	0	0	0	0	0	0	0	0	0	0	0	0	0	0	0	0	0	0	0	k__Metazoa; p__Arthropoda; c__Malacostraca; o__Decapoda; f__unidentified; g__unidentified; s__Anomura_sp._LPdivS-OTU131
RE_COI_412	0	0	0	0	0	0	0	0	0	0	0	0	0	0	0	0	0	0	0	0	0	0	2	4	0	0	0	0	0	0	0	0	0	0	0	0	k__Metazoa; p__Arthropoda; c__Malacostraca; o__Isopoda; f__Cirolanidae; g__Bathynomus; s__Bathynomus_doederleini
RE_COI_413	0	0	0	0	0	0	0	0	0	0	2	0	0	0	0	0	0	0	0	2	0	0	0	0	0	0	0	0	0	0	0	0	0	0	0	0	k__Metazoa; p__Arthropoda; c__Malacostraca; o__Isopoda; f__Ligiidae; g__Ligia; s__Ligia_occidentalis
RE_COI_414	0	0	0	0	0	0	0	0	0	0	0	0	0	0	0	0	0	0	50	2	0	0	0	0	0	0	0	0	0	0	0	0	0	0	0	0	k__Metazoa; p__Arthropoda; c__Malacostraca; o__Isopoda; f__Tainisopidae; g__Pygolabis; s__Pygolabis_sp._7_TLF-2007
RE_COI_415	3	13	0	0	0	0	0	0	0	0	3	0	0	1	0	0	0	0	0	0	0	0	0	0	0	0	0	0	0	0	0	0	0	0	0	0	k__Metazoa; p__Arthropoda; c__Maxillopoda; o__Kentrogonida; f__Sacculinidae; g__Sacculina; s__Sacculina_confragosa
RE_COI_416	0	0	0	0	0	0	0	0	0	0	4	0	23	0	0	0	0	0	0	0	0	0	0	0	0	0	0	1	0	0	5	3	0	1	0	1	k__Metazoa; p__Arthropoda; c__Maxillopoda; o__unidentified; f__unidentified; g__unidentified; s__Maxillopoda_sp._BOLD:ACW5478
RE_COI_417	0	10	0	0	0	0	0	107	39	3126	1187	1785	321	483	0	0	0	0	32	294	0	358	178	73	0	0	131	1567	953	1252	2792	1112	249	171	135	136	k__Metazoa; p__Arthropoda; c__Maxillopoda; o__unidentified; f__unidentified; g__unidentified; s__Maxillopoda_sp._BOLD:ACW5478
RE_COI_418	0	0	0	0	0	0	0	0	1	17	0	0	0	0	0	0	0	0	672	0	0	0	0	0	0	0	0	0	1	1	0	0	0	4	0	0	k__Metazoa; p__Arthropoda; c__Maxillopoda; o__unidentified; f__unidentified; g__unidentified; s__Maxillopoda_sp._BOLD:ACW5664
RE_COI_419	5	9	1	0	108	40	0	2	1	202	225	500	220	41	0	0	0	0	0	0	0	1	0	0	0	0	1	0	0	0	121	56	0	0	0	0	k__Metazoa; p__Arthropoda; c__Ostracoda; o__Podocopida; f__Candonidae; g__Paracypria; s__Paracypria_sp._SH-2014a
RE_COI_420	0	0	0	0	0	0	0	0	2	0	0	2	0	1	0	0	0	0	4	0	0	0	0	0	0	0	0	3	0	1	0	0	0	0	0	0	k__Metazoa; p__Arthropoda; c__Ostracoda; o__Podocopida; f__Cyprididae; g__Bennelongia; s__Bennelongia_koendersae
RE_COI_421	1	0	0	0	0	0	0	1	0	3	6	5	5	5	0	0	0	0	18	0	0	2	16	0	0	0	0	4	0	5	1	1	0	1	0	1	k__Metazoa; p__Arthropoda; c__Ostracoda; o__Podocopida; f__Cyprididae; g__Bennelongia; s__Bennelongia_koendersae
RE_COI_422	1	1	0	0	0	4	0	5	3	6	14	7	14	10	0	0	0	0	48	0	0	0	17	0	0	0	10	9	2	12	3	7	0	0	0	3	k__Metazoa; p__Arthropoda; c__Ostracoda; o__Podocopida; f__Cyprididae; g__Bennelongia; s__Bennelongia_koendersae
RE_COI_423	0	0	1	0	0	0	0	0	0	0	1	0	0	1	0	0	0	0	0	0	0	0	0	0	0	0	0	0	0	0	0	0	0	0	0	0	k__Metazoa; p__Arthropoda; c__Ostracoda; o__Podocopida; f__Cyprididae; g__Bennelongia; s__Bennelongia_sp._15_IS-2015
RE_COI_424	0	0	0	0	0	0	0	0	0	1	0	4	0	0	0	0	0	0	2	0	0	0	0	0	0	0	0	0	0	0	0	0	0	0	0	0	k__Metazoa; p__Arthropoda; c__Ostracoda; o__Podocopida; f__Cyprididae; g__Bennelongia; s__Bennelongia_sp._15_IS-2015
RE_COI_425	0	0	0	0	0	0	0	0	0	0	0	0	0	0	0	0	0	0	0	0	0	0	0	0	0	0	13	0	0	0	0	0	0	0	0	0	k__Metazoa; p__Arthropoda; c__Ostracoda; o__Podocopida; f__Cyprididae; g__Bennelongia; s__Bennelongia_triangulata
RE_COI_426	2	4	2	0	7	9	0	8	6	7	11	13	7	11	0	0	0	0	49	1	0	1	31	0	0	0	17	32	6	31	5	8	0	0	0	2	k__Metazoa; p__Arthropoda; c__Ostracoda; o__Podocopida; f__Cyprididae; g__Bennelongia; s__Bennelongia_triangulata
RE_COI_427	0	0	0	0	0	0	0	0	3	2	0	0	0	0	0	0	0	0	0	0	0	0	0	0	0	0	0	0	0	0	0	0	0	0	0	0	k__Metazoa; p__Arthropoda; c__Ostracoda; o__Podocopida; f__Cyprididae; g__Cypridopsis; s__Cypridopsis_sp._BOLD:AAH0892
RE_COI_428	0	0	0	0	0	0	0	0	0	0	6	2	0	0	0	0	0	0	0	0	0	0	0	0	0	0	0	0	0	0	2	0	0	0	0	0	k__Metazoa; p__Arthropoda; c__Ostracoda; o__Podocopida; f__Cyprididae; g__Cypridopsis; s__Cypridopsis_sp._BOLD:AAH0892
RE_COI_429	0	0	0	0	0	0	0	7	1	0	23	30	0	3	0	0	0	0	0	0	0	0	0	0	0	0	0	0	0	0	0	0	0	0	0	0	k__Metazoa; p__Arthropoda; c__Ostracoda; o__Podocopida; f__Cyprididae; g__Cypridopsis; s__Cypridopsis_sp._BOLD:AAH0892
RE_COI_430	0	0	0	0	0	0	0	0	7	0	0	0	0	0	0	0	0	0	0	0	0	0	0	0	0	0	0	0	0	0	0	0	0	0	0	0	k__Metazoa; p__Arthropoda; c__Ostracoda; o__Podocopida; f__Cyprididae; g__Cypridopsis; s__Cypridopsis_vidua
RE_COI_431	0	0	0	0	1	8	0	0	0	0	2	2	0	0	0	0	0	0	0	0	0	0	0	0	0	0	0	0	0	0	1	0	0	0	0	0	k__Metazoa; p__Arthropoda; c__Ostracoda; o__Podocopida; f__Cyprididae; g__Cypridopsis; s__Cypridopsis_vidua
RE_COI_432	0	0	0	0	11	5	0	0	0	0	0	0	0	0	0	0	0	0	0	0	0	0	0	0	0	0	0	0	0	0	0	0	0	0	0	0	k__Metazoa; p__Arthropoda; c__Ostracoda; o__Podocopida; f__Cyprididae; g__Cypridopsis; s__Cypridopsis_vidua
RE_COI_433	0	0	0	0	15	8	0	0	0	3	0	0	0	0	0	0	0	0	0	0	0	0	0	0	0	0	0	0	0	0	0	0	0	0	0	0	k__Metazoa; p__Arthropoda; c__Ostracoda; o__Podocopida; f__Cyprididae; g__Cypridopsis; s__Cypridopsis_vidua
RE_COI_434	0	0	0	0	0	7	0	0	0	8	6	7	0	0	0	0	0	0	0	0	0	0	0	0	0	0	0	0	0	0	0	0	0	0	1	0	k__Metazoa; p__Arthropoda; c__Ostracoda; o__Podocopida; f__Cyprididae; g__Cypridopsis; s__Cypridopsis_vidua
RE_COI_435	0	0	0	0	0	0	0	0	0	0	3	1	0	0	0	0	0	0	0	0	0	0	0	0	0	0	0	0	0	0	0	0	0	0	0	0	k__Metazoa; p__Arthropoda; c__Ostracoda; o__Podocopida; f__Cyprididae; g__Eucypris; s__Eucypris_virens
RE_COI_436	0	0	0	0	0	0	0	0	0	0	0	1	0	0	0	0	0	0	0	0	0	0	0	0	0	0	0	2	0	0	0	0	0	0	0	2	k__Metazoa; p__Arthropoda; c__Ostracoda; o__Podocopida; f__Cyprididae; g__Eucypris; s__Eucypris_virens
RE_COI_437	0	0	0	0	0	0	0	0	0	0	0	0	0	0	0	0	0	0	0	0	0	0	0	0	0	0	0	0	0	0	7	2	0	0	0	0	k__Metazoa; p__Arthropoda; c__Ostracoda; o__Podocopida; f__Cyprididae; g__Eucypris; s__Eucypris_virens
RE_COI_438	0	1	0	0	3	0	0	1	0	2	6	2	4	4	0	0	0	0	8	0	0	0	7	0	0	0	3	2	0	3	1	0	0	1	0	0	k__Metazoa; p__Arthropoda; c__Ostracoda; o__Podocopida; f__Cyprididae; g__Eucypris; s__Eucypris_virens
RE_COI_439	0	0	0	0	0	0	0	0	1	9	22	36	15	17	0	0	0	0	0	0	0	0	0	0	0	0	0	3	3	7	1	0	0	0	0	0	k__Metazoa; p__Arthropoda; c__Ostracoda; o__Podocopida; f__Cyprididae; g__Eucypris; s__Eucypris_virens
RE_COI_440	0	0	0	0	0	0	0	2	0	24	20	48	18	19	0	0	0	0	1	0	0	0	0	0	0	0	0	4	3	2	1	1	0	1	0	0	k__Metazoa; p__Arthropoda; c__Ostracoda; o__Podocopida; f__Cyprididae; g__Eucypris; s__Eucypris_virens
RE_COI_441	0	0	0	0	0	0	0	5	2	37	63	101	37	35	0	0	0	0	2	0	0	0	0	0	0	0	1	10	6	8	4	1	0	0	0	0	k__Metazoa; p__Arthropoda; c__Ostracoda; o__Podocopida; f__Cyprididae; g__Eucypris; s__Eucypris_virens
RE_COI_442	0	0	0	0	0	0	0	7	1	40	55	97	49	34	0	0	0	0	11	1	0	0	0	0	0	0	0	11	4	12	8	0	0	0	0	0	k__Metazoa; p__Arthropoda; c__Ostracoda; o__Podocopida; f__Cyprididae; g__Eucypris; s__Eucypris_virens
RE_COI_443	0	0	0	0	0	0	0	3	2	55	87	94	56	49	0	0	0	0	13	0	0	1	0	0	0	0	1	10	5	15	4	1	0	0	0	0	k__Metazoa; p__Arthropoda; c__Ostracoda; o__Podocopida; f__Cyprididae; g__Eucypris; s__Eucypris_virens
RE_COI_444	0	0	0	0	0	0	0	12	3	164	189	356	160	126	0	0	0	0	12	1	0	2	0	0	0	0	4	42	17	48	20	2	1	2	0	0	k__Metazoa; p__Arthropoda; c__Ostracoda; o__Podocopida; f__Cyprididae; g__Eucypris; s__Eucypris_virens
RE_COI_445	0	2	6	0	0	2	0	937	505	11608	9457	14345	7247	5277	0	0	0	0	1134	100	0	114	2	8	0	0	404	3207	1856	3109	2314	233	142	200	4	9	k__Metazoa; p__Arthropoda; c__Ostracoda; o__Podocopida; f__Cyprididae; g__Eucypris; s__Eucypris_virens
RE_COI_446	0	0	0	0	0	0	0	0	0	11	11	20	10	1	0	0	0	0	0	0	0	0	0	0	0	0	0	0	0	0	3	4	0	0	0	0	k__Metazoa; p__Arthropoda; c__Ostracoda; o__Podocopida; f__Cyprididae; g__Mytilocypris; s__Mytilocypris_ambiguosa
RE_COI_447	76	81	86	0	16	56	0	183	126	162	269	236	154	223	0	0	0	0	576	11	0	18	1097	19	0	0	226	930	48	1301	25	101	5	26	7	3	k__Metazoa; p__Arthropoda; c__Ostracoda; o__Podocopida; f__Cyprididae; g__Ngarawa; s__Ngarawa_sp._016.7
RE_COI_448	0	0	0	0	0	0	0	0	0	0	0	1	42	0	0	0	0	0	0	0	0	0	0	0	0	0	0	0	0	0	0	0	0	0	0	0	k__Metazoa; p__Arthropoda; c__Ostracoda; o__Podocopida; f__unidentified; g__unidentified; s__Podocopida_sp._BOLD:AAH0889
RE_COI_449	0	0	0	0	0	0	0	0	0	0	2	0	0	3	0	0	0	0	1	0	0	0	1	0	0	0	0	0	0	2	0	0	0	0	0	0	k__Metazoa; p__Arthropoda; c__Ostracoda; o__Podocopida; f__unidentified; g__unidentified; s__Podocopida_sp._BOLD:AAH0895
RE_COI_450	0	0	0	0	0	2	0	0	0	0	0	0	0	0	0	0	0	0	0	0	0	0	0	0	0	0	0	0	0	0	0	0	0	0	0	0	k__Metazoa; p__Arthropoda; c__Ostracoda; o__Podocopida; f__unidentified; g__unidentified; s__Podocopida_sp._BOLD:AAH0908
RE_COI_451	7	6	8	0	0	0	0	0	0	1	3	1	9	3	0	0	0	0	0	0	0	0	0	0	0	0	0	0	0	0	0	0	0	0	0	0	k__Metazoa; p__Bryozoa; c__Gymnolaemata; o__Cheilostomatida; f__Calloporidae; g__Cauloramphus; s__Cauloramphus_korensis
RE_COI_452	0	0	0	0	76	51	0	0	2	0	0	0	0	0	0	0	0	0	0	0	0	0	0	0	0	0	0	0	0	0	0	0	0	0	0	0	k__Metazoa; p__Bryozoa; c__Gymnolaemata; o__Ctenostomatida; f__Nolellidae; g__Anguinella; s__Anguinella_palmata
RE_COI_453	0	0	0	0	0	0	0	0	0	0	0	0	5	1	0	0	0	0	0	0	0	0	0	0	0	0	0	0	0	0	0	0	0	0	0	0	k__Metazoa; p__Bryozoa; c__Gymnolaemata; o__Ctenostomatida; f__Vesiculariidae; g__Amathia; s__Amathia_maxima
RE_COI_454	0	0	0	0	35	41	0	0	0	0	0	0	0	0	0	0	0	0	0	0	0	0	0	0	0	0	0	0	0	0	0	0	0	0	0	0	k__Metazoa; p__Bryozoa; c__Phylactolaemata; o__unidentified; f__Lophopodidae; g__Asajirella; s__Asajirella_gelatinosa
RE_COI_455	5	1	0	0	13	8	0	22	5	3	57	36	23	5	0	0	0	0	0	0	0	0	0	0	0	0	5	3	0	0	0	0	0	0	0	1	k__Metazoa; p__Bryozoa; c__Phylactolaemata; o__unidentified; f__Plumatellidae; g__Hyalinella; s__Hyalinella_punctata
RE_COI_456	7	4	0	0	0	0	0	3	5	316	458	232	330	70	0	0	0	0	0	0	0	0	31	0	0	0	65	0	1	41	2	54	0	0	2	0	k__Metazoa; p__Bryozoa; c__Phylactolaemata; o__unidentified; f__Plumatellidae; g__Plumatella; s__Plumatella_casmiana
RE_COI_457	0	0	0	0	0	0	0	61	55	0	1	247	89	1	0	0	0	0	0	0	0	0	0	0	0	0	0	0	0	0	2	0	0	0	0	0	k__Metazoa; p__Bryozoa; c__Phylactolaemata; o__unidentified; f__Plumatellidae; g__Plumatella; s__Plumatella_fungosa
RE_COI_458	298	156	137	0	17	22	0	39	16	13	1	9	72	12	0	0	0	0	1	0	0	0	0	0	0	0	53	10	0	0	85	5	6	1	0	1	k__Metazoa; p__Bryozoa; c__Phylactolaemata; o__unidentified; f__Plumatellidae; g__Plumatella; s__Plumatella_fungosa
RE_COI_459	0	0	2	0	0	1	0	1	0	0	0	0	0	0	0	0	0	0	0	0	0	0	0	0	0	0	0	0	0	0	0	0	0	0	0	0	k__Metazoa; p__Bryozoa; c__Phylactolaemata; o__unidentified; f__Plumatellidae; g__Plumatella; s__Plumatella_repens
RE_COI_460	12	13	11	0	36	25	0	10	11	0	4	3	0	2	0	0	0	0	0	0	0	0	0	0	0	0	0	0	0	0	0	2	0	0	0	1	k__Metazoa; p__Bryozoa; c__Phylactolaemata; o__unidentified; f__Plumatellidae; g__Plumatella; s__Plumatella_repens
RE_COI_461	0	0	0	0	0	0	0	59	5	16	9	31	0	41	0	0	0	0	0	0	0	0	0	0	0	0	0	1	1	0	0	0	44	0	0	0	k__Metazoa; p__Bryozoa; c__Phylactolaemata; o__unidentified; f__Plumatellidae; g__Plumatella; s__Plumatella_repens
RE_COI_462	40	23	27	0	50	35	0	27	16	0	6	3	20	3	0	0	0	0	6	0	0	0	0	0	0	0	0	0	0	1	1	0	3	0	1	0	k__Metazoa; p__Bryozoa; c__Phylactolaemata; o__unidentified; f__Plumatellidae; g__Plumatella; s__Plumatella_repens
RE_COI_463	0	0	0	0	0	0	0	0	4	0	0	0	0	0	0	0	0	0	0	0	0	0	0	0	0	0	0	0	0	0	0	0	1	0	0	0	k__Metazoa; p__Bryozoa; c__Phylactolaemata; o__unidentified; f__Plumatellidae; g__unidentified; s__Plumatellidae_sp._SHSY140624
RE_COI_464	0	0	0	0	0	1	0	0	0	0	0	4	0	0	0	0	0	0	0	0	0	0	0	0	0	0	2	0	0	0	0	1	0	0	0	0	k__Metazoa; p__Bryozoa; c__Phylactolaemata; o__unidentified; f__Plumatellidae; g__unidentified; s__Plumatellidae_sp._SHSY140624
RE_COI_465	0	0	0	0	0	0	0	0	0	0	1	0	9	0	0	0	0	0	0	0	0	0	0	0	0	0	0	0	0	0	0	0	0	0	0	0	k__Metazoa; p__Bryozoa; c__Phylactolaemata; o__unidentified; f__Plumatellidae; g__unidentified; s__Plumatellidae_sp._SHSY140624
RE_COI_466	0	0	0	0	2	0	0	0	0	0	2	1	5	2	0	0	0	0	0	0	0	0	0	0	0	0	0	0	0	0	0	1	0	0	0	0	k__Metazoa; p__Bryozoa; c__Phylactolaemata; o__unidentified; f__Plumatellidae; g__unidentified; s__Plumatellidae_sp._SHSY140624
RE_COI_467	0	1	0	0	0	2	0	0	0	0	1	0	3	0	0	0	0	0	5	0	0	0	0	0	0	0	0	0	0	0	0	3	2	0	0	0	k__Metazoa; p__Bryozoa; c__Phylactolaemata; o__unidentified; f__Plumatellidae; g__unidentified; s__Plumatellidae_sp._SHSY140624
RE_COI_468	0	0	0	0	2	0	0	3	3	0	1	0	2	0	0	0	0	0	0	0	0	0	0	0	0	0	3	0	0	1	2	0	0	0	0	0	k__Metazoa; p__Bryozoa; c__Phylactolaemata; o__unidentified; f__Plumatellidae; g__unidentified; s__Plumatellidae_sp._SHSY140624
RE_COI_469	23	12	10	0	151	132	0	40	51	55	96	48	217	23	0	0	0	0	304	4	0	2	1	3	0	0	118	2	3	3	77	29	53	11	8	0	k__Metazoa; p__Bryozoa; c__Phylactolaemata; o__unidentified; f__Plumatellidae; g__unidentified; s__Plumatellidae_sp._SHSY140624
RE_COI_470	0	0	0	0	0	0	0	0	0	0	0	0	0	0	0	0	0	0	1	0	0	0	0	0	0	0	0	0	0	0	2	0	3	0	0	0	k__Metazoa; p__Chordata; c__Actinopteri; o__Beloniformes; f__Belonidae; g__Tylosurus; s__Tylosurus_crocodilus
RE_COI_471	1	1	8	0	0	0	0	0	0	0	0	0	0	0	0	0	0	0	0	0	0	0	0	0	0	0	0	0	0	0	0	0	0	0	0	0	k__Metazoa; p__Chordata; c__Actinopteri; o__Beloniformes; f__Zenarchopteridae; g__Hemirhamphodon; s__Hemirhamphodon_sp._MDB-2013
RE_COI_472	0	0	0	0	0	0	0	0	0	8	11	18	34	3	0	0	0	0	60	5	0	1	0	0	0	0	0	0	0	0	0	0	0	0	0	0	k__Metazoa; p__Chordata; c__Actinopteri; o__Carangiformes; f__Carangidae; g__TrachinS-OTUs; s__TrachinS-OTUs_falcatus
RE_COI_473	0	0	0	0	0	0	0	0	0	2	1	0	0	0	0	0	0	0	5	1	0	0	0	0	0	0	0	0	0	0	0	0	0	0	0	0	k__Metazoa; p__Chordata; c__Actinopteri; o__Cypriniformes; f__Cyprinidae; g__Barilius; s__Barilius_sp._BOF54
RE_COI_474	2	2	0	0	0	0	0	21	22	0	0	0	0	0	0	0	0	0	0	0	0	0	0	0	0	0	0	0	0	0	0	0	0	0	0	0	k__Metazoa; p__Chordata; c__Actinopteri; o__Cypriniformes; f__Cyprinidae; g__Carassius; s__Carassius_gibelio
RE_COI_475	0	0	2	0	0	0	0	1	0	0	0	0	0	0	0	0	0	0	6	0	0	21	0	0	0	0	0	0	0	2	3	0	0	0	0	0	k__Metazoa; p__Chordata; c__Actinopteri; o__Cypriniformes; f__Cyprinidae; g__Cyprinus; s__Cyprinus_carpio
RE_COI_476	53	64	498	0	1	2	0	4	1	0	0	0	0	0	0	0	0	0	0	0	0	0	0	0	0	0	0	0	0	2	0	0	0	0	1	1	k__Metazoa; p__Chordata; c__Actinopteri; o__Cypriniformes; f__Cyprinidae; g__Hemiculter; s__Hemiculter_bleekeri
RE_COI_477	5	9	77	0	0	0	0	0	1	0	0	0	0	0	0	0	0	0	0	0	0	0	0	0	0	0	0	0	0	0	0	0	0	0	0	0	k__Metazoa; p__Chordata; c__Actinopteri; o__Cypriniformes; f__Cyprinidae; g__Hemiculter; s__Hemiculter_eigenmanni
RE_COI_478	0	0	0	0	0	0	0	0	0	7	28	18	1	0	0	0	0	0	15	0	0	0	0	0	0	0	3	0	0	0	0	0	0	0	0	0	k__Metazoa; p__Chordata; c__Actinopteri; o__Cypriniformes; f__Cyprinidae; g__Rasbora; s__Rasbora_ornata
RE_COI_479	0	0	0	0	0	0	0	0	0	4	12	25	3	1	0	0	0	0	6	0	0	1	0	0	0	0	0	0	0	0	0	1	0	0	0	0	k__Metazoa; p__Chordata; c__Actinopteri; o__Gerreiformes; f__Gerreidae; g__Gerres; s__Gerres_filamentosus
RE_COI_480	3	1	0	0	0	0	0	0	1	0	0	0	0	0	0	0	0	0	0	0	0	0	0	0	0	0	0	0	0	0	0	0	0	0	0	0	k__Metazoa; p__Chordata; c__Actinopteri; o__Gobiiformes; f__Gobiidae; g__Rhinogobius; s__Rhinogobius_brunneus
RE_COI_481	7	6	3	0	147	67	0	77	74	0	0	0	0	0	0	0	0	0	0	0	0	0	0	0	0	0	0	0	0	0	0	0	0	0	0	0	k__Metazoa; p__Chordata; c__Actinopteri; o__Gobiiformes; f__Gobiidae; g__Rhinogobius; s__Rhinogobius_giurinus
RE_COI_482	0	0	0	0	0	0	0	0	0	0	0	0	0	0	0	0	0	0	0	0	0	0	0	0	0	0	0	0	0	0	0	0	0	1	2	0	k__Metazoa; p__Chordata; c__Actinopteri; o__Pempheriformes; f__Glaucosomatidae; g__Glaucosoma; s__Glaucosoma_buergeri
RE_COI_483	0	0	0	0	0	0	0	0	0	1	9	1	5	0	0	0	0	0	1	0	0	0	1	0	0	0	0	0	0	0	0	0	0	0	0	0	k__Metazoa; p__Chordata; c__Actinopteri; o__Pempheriformes; f__Pempheridae; g__Pempheris; s__Pempheris_oualensis
RE_COI_484	0	0	0	0	0	0	0	0	0	27	46	3	1	0	0	0	0	0	0	0	0	0	0	0	0	0	0	0	0	0	0	0	0	0	0	0	k__Metazoa; p__Chordata; c__Actinopteri; o__Perciformes; f__Gasterosteidae; g__Gasterosteus; s__Gasterosteus_gymnurus
RE_COI_485	0	0	0	0	0	0	0	1	0	8	8	1	3	0	0	0	0	0	4	5	0	0	0	3	0	0	0	0	0	0	0	0	0	0	0	0	k__Metazoa; p__Chordata; c__Actinopteri; o__Perciformes; f__Nototheniidae; g__Patagonotothen; s__Patagonotothen_tessellata
RE_COI_486	0	0	0	0	0	0	0	0	0	0	0	0	0	0	0	0	0	0	15	0	0	0	0	0	0	0	0	0	0	0	0	0	0	0	0	0	k__Metazoa; p__Chordata; c__Actinopteri; o__Perciformes; f__Percidae; g__Etheostoma; s__Etheostoma_douglasi
RE_COI_487	0	0	16	0	0	0	0	0	0	0	8	3	27	5	0	0	0	0	26	0	0	0	0	0	0	0	2	8	21	26	52	17	23	0	1	1	k__Metazoa; p__Chordata; c__Amphibia; o__Anura; f__Craugastoridae; g__Holoaden; s__Holoaden_luederwaldti
RE_COI_488	0	0	0	0	0	0	0	0	0	1	6	3	0	0	0	0	0	0	148	0	0	1	0	0	0	0	0	0	0	0	0	0	0	0	0	0	k__Metazoa; p__Chordata; c__Amphibia; o__Anura; f__Mantellidae; g__Boophis; s__Boophis_quasiboehmei
RE_COI_489	0	0	0	0	0	0	0	0	0	22	46	8	6	1	0	0	0	0	0	0	0	0	0	0	0	0	0	0	0	0	0	0	0	0	0	0	k__Metazoa; p__Chordata; c__Amphibia; o__Anura; f__Mantellidae; g__Guibemantis; s__Guibemantis_sp._7_MV-2009
RE_COI_490	0	0	0	0	0	0	0	0	0	0	0	0	0	0	0	0	0	0	10	0	0	0	0	0	0	0	0	0	0	0	0	0	0	0	0	0	k__Metazoa; p__Chordata; c__Amphibia; o__Anura; f__Microhylidae; g__Microhyla; s__Microhyla_achatina
RE_COI_491	0	0	0	0	0	0	0	0	0	1	5	6	0	0	0	0	0	0	0	0	0	0	0	0	0	0	0	0	0	0	0	0	0	0	0	0	k__Metazoa; p__Chordata; c__Amphibia; o__Anura; f__Ranidae; g__Rana; s__Rana_areolata
RE_COI_492	0	0	0	0	0	0	0	0	0	2	0	0	0	0	0	0	0	0	1	24	0	0	1	42	0	0	10	0	0	0	0	0	0	0	0	0	k__Metazoa; p__Chordata; c__Aves; o__Anseriformes; f__Anatidae; g__Anser; s__Anser_fabalis
RE_COI_493	0	0	0	0	0	0	0	0	0	12	9	29	162	9	0	0	0	0	2	0	0	16	13	4	0	0	0	0	0	0	0	0	0	0	0	0	k__Metazoa; p__Chordata; c__Aves; o__Charadriiformes; f__Laridae; g__Larus; s__Larus_crassirostris
RE_COI_494	0	0	0	0	0	0	0	0	0	0	0	0	0	0	0	0	0	0	0	5	0	0	0	0	0	0	0	0	0	0	0	0	0	0	0	0	k__Metazoa; p__Chordata; c__Aves; o__Passeriformes; f__Dendrocolaptidae; g__Lepidocolaptes; s__Lepidocolaptes_albolineatus
RE_COI_495	0	0	0	0	0	0	0	0	0	0	0	0	0	0	0	0	0	0	10	0	0	3	0	0	0	0	0	0	0	0	0	0	0	0	0	0	k__Metazoa; p__Chordata; c__Aves; o__Passeriformes; f__Furnariidae; g__Aphrastura; s__Aphrastura_spinicauda
RE_COI_496	0	0	0	0	0	0	0	0	0	8	2	0	11	0	0	0	0	0	0	0	0	0	0	0	0	0	0	0	0	0	0	0	0	0	0	0	k__Metazoa; p__Chordata; c__Aves; o__Passeriformes; f__Passeridae; g__Passer; s__Passer_montanus
RE_COI_497	0	0	0	0	0	0	0	0	0	4	11	2	2	2	0	0	0	0	293	6	0	0	0	0	0	0	0	0	0	0	0	0	0	0	0	0	k__Metazoa; p__Chordata; c__Aves; o__Psittaciformes; f__Psittacidae; g__Ara; s__Ara_ararauna
RE_COI_498	1	15	2	0	0	0	0	0	0	0	0	0	0	0	0	0	0	0	0	0	0	0	0	0	0	0	0	0	0	0	0	0	0	0	0	0	k__Metazoa; p__Chordata; c__Mammalia; o__Carnivora; f__Canidae; g__Canis; s__Canis_lupus
RE_COI_499	0	0	0	0	0	0	0	0	0	3	35	23	1	0	0	0	0	0	0	0	0	0	0	0	0	0	0	0	0	0	0	0	0	0	0	0	k__Metazoa; p__Chordata; c__Mammalia; o__Chiroptera; f__Phyllostomidae; g__Artibeus; s__Artibeus_bogotensis
RE_COI_500	0	0	0	0	0	0	0	0	0	0	2	6	0	0	0	0	0	0	0	0	0	0	0	0	0	0	0	0	0	0	0	0	0	0	0	0	k__Metazoa; p__Chordata; c__Mammalia; o__Chiroptera; f__Phyllostomidae; g__Carollia; s__Carollia_brevicauda
RE_COI_501	0	4	0	0	0	0	0	0	0	1	0	0	0	0	0	0	0	0	0	0	0	0	0	0	0	0	0	0	0	0	0	0	0	0	0	0	k__Metazoa; p__Chordata; c__Mammalia; o__Chiroptera; f__Phyllostomidae; g__Chiroderma; s__Chiroderma_villosum
RE_COI_502	0	0	0	0	0	0	0	0	0	0	0	0	0	0	0	0	0	0	0	0	0	0	0	0	0	0	0	0	0	0	0	7	0	0	0	0	k__Metazoa; p__Chordata; c__Mammalia; o__Chiroptera; f__Vespertilionidae; g__Murina; s__Murina_cf._cyclotis
RE_COI_503	0	0	0	0	0	0	0	0	0	1	0	0	0	0	0	0	0	0	1	0	0	2	2	3	0	0	0	0	0	0	0	0	0	0	0	0	k__Metazoa; p__Chordata; c__Mammalia; o__Cingulata; f__Dasypodidae; g__Dasypus; s__Dasypus_novemcinctus
RE_COI_504	0	0	0	0	0	0	0	0	0	0	0	0	0	0	0	0	0	0	0	0	0	4	0	6	0	0	0	0	0	0	0	0	0	0	0	0	k__Metazoa; p__Chordata; c__Mammalia; o__Cingulata; f__Dasypodidae; g__Dasypus; s__Dasypus_yepesi
RE_COI_505	4	3	13	0	0	1	0	8	10	0	1	0	0	1	0	0	0	0	37	0	0	4	12	1	0	0	6	0	0	0	2	0	0	0	0	1	k__Metazoa; p__Chordata; c__Mammalia; o__Primates; f__Hominidae; g__Homo; s__Homo_sapiens
RE_COI_506	0	1	0	0	0	0	0	0	12	0	0	0	0	0	0	0	0	0	0	0	0	0	0	0	0	0	0	0	0	0	0	0	0	1	19	12	k__Metazoa; p__Chordata; c__Mammalia; o__Rodentia; f__Cricetidae; g__Hylaeamys; s__Hylaeamys_yunganus
RE_COI_507	1	1	2	0	0	1	0	1	1	0	2	0	1	0	0	0	0	0	4	0	0	0	0	0	0	0	0	0	0	0	0	0	0	0	0	0	k__Metazoa; p__Chordata; c__Mammalia; o__Rodentia; f__Muridae; g__Rattus; s__Rattus_lutreolus
RE_COI_508	0	1	13	0	0	6	0	22	2	0	2	2	2	1	0	0	0	0	0	3	0	2	0	0	0	0	3	2	0	2	0	0	0	0	0	1	k__Metazoa; p__Chordata; c__Mammalia; o__unidentified; f__Bovidae; g__Bos; s__Bos_taurus
RE_COI_509	0	0	0	0	0	0	0	0	0	0	0	0	0	0	0	0	0	0	0	0	0	0	0	6	0	0	0	0	0	0	0	0	0	0	0	0	k__Metazoa; p__Chordata; c__Mammalia; o__unidentified; f__Bovidae; g__Pantholops; s__Pantholops_hodgsonii
RE_COI_510	0	0	0	0	1	0	0	0	0	0	0	0	0	0	0	0	0	0	1086	7	0	1	0	0	0	0	0	0	0	0	0	0	0	0	0	0	k__Metazoa; p__Chordata; c__Mammalia; o__unidentified; f__Suidae; g__Sus; s__Sus_scrofa
RE_COI_511	0	0	0	0	0	0	0	0	0	0	0	0	0	0	0	0	0	0	3	0	0	0	0	0	0	0	0	0	0	0	0	0	0	0	0	0	k__Metazoa; p__Cnidaria; c__Anthozoa; o__Scleractinia; f__Fungiacyathidae; g__Fungiacyathus; s__Fungiacyathus_stephanus
RE_COI_512	0	0	0	0	0	0	0	1	0	1	1	4	0	0	0	0	0	0	3	0	0	0	0	0	0	0	0	0	0	0	0	0	0	0	0	0	k__Metazoa; p__Cnidaria; c__Anthozoa; o__Scleractinia; f__Fungiidae; g__Lobactis; s__Lobactis_scutaria
RE_COI_513	0	0	0	0	1	0	0	0	0	0	0	0	0	0	0	0	0	0	0	0	0	0	0	0	0	0	0	1	0	0	0	0	1	0	0	0	k__Metazoa; p__Cnidaria; c__Anthozoa; o__Scleractinia; f__Merulinidae; g__Echinopora; s__Echinopora_horrida
RE_COI_514	1	1	0	0	0	0	0	3	0	0	0	0	0	0	0	0	0	0	0	0	0	0	0	0	0	0	0	0	0	0	0	0	0	0	0	0	k__Metazoa; p__Cnidaria; c__Anthozoa; o__Scleractinia; f__Oculinidae; g__Madrepora; s__Madrepora_oculata
RE_COI_515	0	0	0	0	0	5	0	0	0	0	0	0	0	0	0	0	0	0	0	0	0	0	0	0	0	0	0	0	0	0	0	0	0	0	0	0	k__Metazoa; p__Cnidaria; c__Anthozoa; o__Scleractinia; f__Oculinidae; g__Madrepora; s__Madrepora_oculata
RE_COI_516	0	0	0	0	1	0	0	457	368	0	0	0	0	0	0	0	0	0	0	1	0	0	0	0	0	0	0	0	0	0	0	0	0	0	1	0	k__Metazoa; p__Cnidaria; c__Hydrozoa; o__Anthoathecata; f__Bougainvilliidae; g__Bougainvillia; s__Bougainvillia_triestina
RE_COI_517	6	4	1	0	0	0	0	0	0	0	0	0	0	0	0	0	0	0	0	0	0	0	0	0	0	0	0	0	0	0	0	0	0	0	0	0	k__Metazoa; p__Cnidaria; c__Hydrozoa; o__Anthoathecata; f__Bougainvilliidae; g__Velkovrhia; s__Velkovrhia_enigmatica
RE_COI_518	0	0	0	0	0	0	0	0	0	0	5	1	0	0	0	0	0	0	0	0	0	0	0	0	0	0	0	0	0	0	0	0	0	0	0	0	k__Metazoa; p__Cnidaria; c__Hydrozoa; o__Anthoathecata; f__Corynidae; g__Sarsia; s__Sarsia_tubulosa
RE_COI_519	0	0	0	0	0	0	0	497	569	2	0	0	1	0	0	0	0	0	0	0	0	0	0	0	0	0	0	0	0	0	0	0	0	0	0	0	k__Metazoa; p__Cnidaria; c__Hydrozoa; o__Anthoathecata; f__Hydridae; g__Hydra; s__Hydra_oligactis
RE_COI_520	0	0	0	0	0	0	0	383	449	2	0	0	0	0	0	0	0	0	0	0	0	0	0	1	0	0	0	0	0	1	22	10	74	1	0	0	k__Metazoa; p__Cnidaria; c__Hydrozoa; o__Anthoathecata; f__Hydridae; g__Hydra; s__Hydra_vulgaris
RE_COI_521	10	6	20	0	16	4	0	0	2	0	0	0	0	0	0	0	0	0	0	0	0	0	0	0	0	0	0	0	0	0	0	0	0	0	0	0	k__Metazoa; p__Cnidaria; c__Hydrozoa; o__Anthoathecata; f__Pandeidae; g__Amphinema; s__Amphinema_sp._JRH-2012
RE_COI_522	0	0	0	0	0	0	0	0	0	0	0	1	2	0	0	0	0	0	0	0	0	0	0	0	0	0	2	0	0	0	0	0	0	0	0	0	k__Metazoa; p__Cnidaria; c__Hydrozoa; o__Anthoathecata; f__Pandeidae; g__Leuckartiara; s__Leuckartiara_sp._JRH-2012
RE_COI_523	0	0	0	0	0	0	0	0	0	0	2	5	0	0	0	0	0	0	0	0	0	0	0	0	0	0	0	0	0	0	0	0	0	0	0	0	k__Metazoa; p__Cnidaria; c__Hydrozoa; o__Anthoathecata; f__Rathkeidae; g__Rathkea; s__Rathkea_octopunctata
RE_COI_524	0	0	0	0	0	0	0	0	0	0	0	2	1	0	0	0	0	0	0	0	0	0	0	0	0	0	0	0	0	0	0	0	0	0	0	0	k__Metazoa; p__Cnidaria; c__Hydrozoa; o__Anthoathecata; f__Tubulariidae; g__Ectopleura; s__Ectopleura_larynx
RE_COI_525	1	0	3	0	0	0	0	0	0	0	0	0	0	0	0	0	0	0	5	0	0	0	0	0	0	0	0	0	0	0	0	1	0	0	0	0	k__Metazoa; p__Cnidaria; c__Hydrozoa; o__Anthoathecata; f__Zancleidae; g__Zanclea; s__Zanclea_sango
RE_COI_526	0	0	0	0	0	0	0	0	0	1	0	2	2	0	0	0	0	0	0	0	0	0	0	0	0	0	0	0	0	0	0	0	0	0	0	0	k__Metazoa; p__Cnidaria; c__Hydrozoa; o__Anthoathecata; f__Zancleidae; g__Zanclea; s__Zanclea_sp._KA037
RE_COI_527	0	0	0	0	0	0	0	0	0	0	0	0	0	0	0	0	0	0	0	0	0	0	0	0	0	0	0	0	0	0	0	1	2	0	0	0	k__Metazoa; p__Cnidaria; c__Hydrozoa; o__Leptothecata; f__Campanulariidae; g__Bonneviella; s__Bonneviella_sp._4_839AS
RE_COI_528	0	0	0	0	0	0	0	0	0	0	0	0	0	0	0	0	0	0	7	0	0	0	0	0	0	0	2	0	0	0	0	1	0	0	0	0	k__Metazoa; p__Cnidaria; c__Hydrozoa; o__Leptothecata; f__Campanulariidae; g__Campanularia; s__Campanularia_sp._MZUSP_2761
RE_COI_529	0	0	0	0	0	0	0	0	0	0	0	0	0	2	0	0	0	0	0	0	0	0	0	0	0	0	0	0	0	0	0	0	0	0	0	0	k__Metazoa; p__Cnidaria; c__Hydrozoa; o__Leptothecata; f__Campanulariidae; g__Clytia; s__Clytia_gracilis
RE_COI_530	0	0	0	0	0	7	0	0	0	0	0	0	0	0	0	0	0	0	0	0	0	0	0	0	0	0	0	0	0	0	0	0	0	0	0	0	k__Metazoa; p__Cnidaria; c__Hydrozoa; o__Leptothecata; f__Campanulariidae; g__Clytia; s__Clytia_gracilis
RE_COI_531	0	0	0	0	0	0	0	0	0	1	6	10	0	1	0	0	0	0	25	11	0	9	1	5	0	0	0	0	0	0	0	0	0	0	0	0	k__Metazoa; p__Cnidaria; c__Hydrozoa; o__Leptothecata; f__Campanulariidae; g__Obelia; s__Obelia_bidentata
RE_COI_532	0	0	0	0	0	0	0	0	0	0	2	5	0	0	0	0	0	0	0	0	0	0	0	0	0	0	0	0	0	0	0	0	0	0	0	0	k__Metazoa; p__Cnidaria; c__Hydrozoa; o__Leptothecata; f__Campanulariidae; g__Obelia; s__Obelia_dichotoma
RE_COI_533	0	0	0	0	0	0	0	0	0	0	1	3	2	0	0	0	0	0	3	0	0	0	0	0	0	0	0	0	0	0	0	0	0	0	0	0	k__Metazoa; p__Cnidaria; c__Hydrozoa; o__Leptothecata; f__Campanulariidae; g__Orthopyxis; s__Orthopyxis_integra
RE_COI_534	0	0	0	0	0	0	0	0	0	0	2	0	0	0	0	0	0	0	0	0	0	0	0	0	0	0	0	0	0	0	0	0	1	0	0	0	k__Metazoa; p__Cnidaria; c__Hydrozoa; o__Leptothecata; f__Eirenidae; g__Eirene; s__Eirene_brevistylus
RE_COI_535	0	0	0	0	0	0	0	469	350	3	0	0	0	0	0	0	0	0	0	0	0	0	0	0	0	0	0	0	0	0	0	0	0	1	1	2	k__Metazoa; p__Cnidaria; c__Hydrozoa; o__Leptothecata; f__Plumulariidae; g__Plumularia; s__Plumularia_mooreana
RE_COI_536	0	0	0	0	0	0	0	8	3	0	0	0	0	0	0	0	0	0	0	0	0	0	0	0	0	0	0	0	0	0	0	0	0	0	0	0	k__Metazoa; p__Cnidaria; c__Hydrozoa; o__Limnomedusae; f__Olindiidae; g__Craspedacusta; s__Craspedacusta_sowerbyi
RE_COI_537	0	0	0	0	0	0	0	178	202	1	0	1	0	0	0	0	0	0	0	0	0	0	0	0	0	0	0	0	0	0	0	0	0	0	0	0	k__Metazoa; p__Cnidaria; c__Hydrozoa; o__Limnomedusae; f__Olindiidae; g__Craspedacusta; s__Craspedacusta_sowerbyi
RE_COI_538	0	0	0	0	0	0	0	177	210	0	0	0	0	0	0	0	0	0	0	0	0	0	0	0	0	0	0	0	0	0	0	0	0	0	0	0	k__Metazoa; p__Cnidaria; c__Hydrozoa; o__Limnomedusae; f__Olindiidae; g__Craspedacusta; s__Craspedacusta_sowerbyi
RE_COI_539	0	0	0	0	0	0	0	0	0	14	18	15	0	1	0	0	0	0	439	2	0	5	0	0	0	0	0	0	0	0	0	0	0	0	0	0	k__Metazoa; p__Cnidaria; c__Hydrozoa; o__Siphonophorae; f__Apolemiidae; g__Apolemia; s__Apolemia_sp._BO-2009
RE_COI_540	0	0	0	0	0	0	0	0	0	5	5	5	0	0	0	0	0	0	11	0	0	0	0	0	0	0	0	0	0	0	1	0	0	0	0	0	k__Metazoa; p__Cnidaria; c__Hydrozoa; o__unidentified; f__unidentified; g__unidentified; s__Hydrozoa_sp._prey_of_Macellomenia_sp._KMK-2014
RE_COI_541	0	1	4	0	0	0	0	0	0	0	0	0	0	0	0	0	0	0	0	0	0	0	0	0	0	0	0	0	0	0	0	0	0	0	0	0	k__Metazoa; p__Cnidaria; c__Scyphozoa; o__Semaeostomeae; f__Pelagiidae; g__Pelagia; s__Pelagia_benovici
RE_COI_542	0	0	0	0	20	0	0	2	20	0	0	1	1	1	0	0	0	0	7	0	0	0	1	0	0	0	7	0	0	0	0	0	0	0	0	0	k__Metazoa; p__Cnidaria; c__Scyphozoa; o__Semaeostomeae; f__Ulmaridae; g__Aurelia; s__Aurelia_sp._6_sensu_Dawson_et_al._(2005)
RE_COI_543	3	0	16	0	3	1	0	0	0	0	0	0	0	0	0	0	0	0	0	0	0	0	0	0	0	0	0	0	0	0	0	0	0	0	0	0	k__Metazoa; p__Cnidaria; c__Staurozoa; o__Stauromedusae; f__Haliclystidae; g__Manania; s__Manania_gwilliami
RE_COI_544	0	0	3	0	0	0	0	0	0	0	0	0	0	0	0	0	0	0	0	0	0	0	0	0	0	0	0	0	0	0	0	0	0	0	0	0	k__Metazoa; p__Cnidaria; c__unidentified; o__unidentified; f__unidentified; g__unidentified; s__Cnidaria_sp._AA-2013
RE_COI_545	0	0	0	0	0	0	0	0	0	0	0	0	0	0	0	0	0	0	0	1	0	0	0	0	0	0	1	0	0	0	0	0	0	0	0	0	k__Metazoa; p__Echinodermata; c__Crinoidea; o__Comatulida; f__Colobometridae; g__Colobometra; s__Colobometra_perspinosa
RE_COI_546	0	0	0	0	0	0	0	0	0	0	0	0	0	0	0	0	0	0	0	0	0	0	0	0	0	0	0	0	0	0	0	4	5	0	0	0	k__Metazoa; p__Echinodermata; c__Crinoidea; o__Comatulida; f__Comatulidae; g__Anneissia; s__Anneissia_japonica
RE_COI_547	0	0	0	0	0	0	0	0	0	0	0	3	0	0	0	0	0	0	0	1	0	0	0	0	0	0	0	0	0	0	0	0	0	0	0	0	k__Metazoa; p__Echinodermata; c__Crinoidea; o__Comatulida; f__Comatulidae; g__Clarkcomanthus; s__Clarkcomanthus_littoralis
RE_COI_548	0	0	0	0	0	0	0	0	0	0	0	0	1	0	0	0	0	0	15	4	0	0	0	0	0	0	0	0	0	0	0	3	0	0	0	0	k__Metazoa; p__Echinodermata; c__Crinoidea; o__Comatulida; f__Comatulidae; g__Clarkcomanthus; s__Clarkcomanthus_littoralis
RE_COI_549	2	2	0	0	0	0	0	0	0	0	0	0	0	0	0	0	0	0	0	0	0	0	0	0	0	0	0	0	0	0	0	0	0	0	0	0	k__Metazoa; p__Echinodermata; c__Crinoidea; o__Comatulida; f__Comatulidae; g__Comanthus; s__Comanthus_sp._5_MS-2016
RE_COI_550	0	0	0	0	0	0	0	0	0	1	0	0	0	1	0	0	0	0	0	0	0	28	2	1	0	0	0	0	0	0	0	0	0	0	0	0	k__Metazoa; p__Echinodermata; c__Echinoidea; o__Echinoida; f__Echinometridae; g__Heliocidaris; s__Heliocidaris_tuberculata
RE_COI_551	0	0	0	0	0	0	0	0	0	0	0	0	0	0	0	0	0	0	0	0	0	0	0	0	0	0	0	0	0	0	0	5	0	0	0	0	k__Metazoa; p__Echinodermata; c__Echinoidea; o__Temnopleuroida; f__Toxopneustidae; g__Tripneustes; s__Tripneustes_gratilla
RE_COI_552	0	2	11	0	0	9	0	0	1	0	0	0	0	0	0	0	0	0	0	0	0	0	0	0	0	0	0	0	0	0	0	0	0	0	0	0	k__Metazoa; p__Gastrotricha; c__unidentified; o__Chaetonotida; f__Chaetonotidae; g__ChaetonS-OTUs; s__ChaetonS-OTUs_aemilianus
RE_COI_553	1	4	4	0	0	0	0	0	0	0	0	0	0	0	0	0	0	0	0	0	0	0	0	0	0	0	0	0	0	0	0	0	0	0	0	0	k__Metazoa; p__Gastrotricha; c__unidentified; o__Chaetonotida; f__Chaetonotidae; g__ChaetonS-OTUs; s__ChaetonS-OTUs_cf._hystrix_TK90
RE_COI_554	0	0	0	0	0	0	0	0	0	0	0	0	0	0	0	0	0	0	0	0	0	2	0	2	0	0	0	0	1	0	1	2	8	0	0	0	k__Metazoa; p__Gastrotricha; c__unidentified; o__Chaetonotida; f__Chaetonotidae; g__ChaetonS-OTUs; s__ChaetonS-OTUs_cf._oculifer_TK188
RE_COI_555	0	0	8	0	0	0	0	0	0	0	0	0	0	0	0	0	0	0	0	0	0	0	0	0	0	0	0	0	0	0	0	0	0	0	0	0	k__Metazoa; p__Gastrotricha; c__unidentified; o__Chaetonotida; f__Chaetonotidae; g__ChaetonS-OTUs; s__ChaetonS-OTUs_microchaetus
RE_COI_556	1	1	0	0	0	0	0	0	0	0	0	0	0	0	0	0	0	0	0	0	0	0	0	0	0	0	0	0	0	0	0	0	0	0	0	0	k__Metazoa; p__Gastrotricha; c__unidentified; o__Chaetonotida; f__Chaetonotidae; g__ChaetonS-OTUs; s__ChaetonS-OTUs_sp._TK216
RE_COI_557	0	0	0	0	0	0	0	0	0	0	0	0	0	0	0	0	0	0	15	0	0	2	0	0	0	0	0	0	0	0	1	0	0	0	0	0	k__Metazoa; p__Gastrotricha; c__unidentified; o__Chaetonotida; f__Chaetonotidae; g__Lepidodermella; s__Lepidodermella_squamata
RE_COI_558	0	0	0	0	0	0	0	0	0	1	11	4	15	0	0	0	0	0	0	0	0	0	0	0	0	0	0	0	0	0	1	0	0	0	0	0	k__Metazoa; p__Gastrotricha; c__unidentified; o__Macrodasyida; f__Macrodasyidae; g__Urodasys; s__Urodasys_sp._114a
RE_COI_559	0	0	0	0	0	8	0	0	6	0	0	0	0	0	0	0	0	0	0	0	0	0	0	0	0	0	0	0	0	0	0	0	0	0	0	0	k__Metazoa; p__Mollusca; c__Bivalvia; o__Mytiloida; f__Mytilidae; g__Brachidontes; s__Brachidontes_rostratus
RE_COI_560	0	0	0	0	0	0	0	0	0	0	0	0	0	0	0	0	0	0	0	0	0	0	0	4	0	0	0	0	0	0	0	0	0	0	0	0	k__Metazoa; p__Mollusca; c__Bivalvia; o__Pectinoida; f__Pectinidae; g__Mimachlamys; s__Mimachlamys_senatoria
RE_COI_561	0	0	0	0	0	0	0	0	0	0	0	0	0	0	0	0	0	0	1	618	0	1	0	0	0	0	0	0	0	0	0	0	0	0	0	0	k__Metazoa; p__Mollusca; c__Bivalvia; o__Pholadomyoida; f__Cuspidariidae; g__Cuspidaria; s__Cuspidaria_glacialis
RE_COI_562	0	0	0	0	0	0	0	0	0	2	1	2	4	1	0	0	0	0	0	0	0	0	0	0	0	0	0	0	0	0	0	0	0	0	0	0	k__Metazoa; p__Mollusca; c__Bivalvia; o__Unionoida; f__Hyriidae; g__Echyridella; s__Echyridella_menziesii
RE_COI_563	1	1	2	0	0	0	0	0	0	0	0	0	0	0	0	0	0	0	0	0	0	0	0	0	0	0	0	0	0	0	0	0	0	0	0	0	k__Metazoa; p__Mollusca; c__Bivalvia; o__Veneroida; f__Corbiculidae; g__Corbicula; s__Corbicula_sp._MY2013-F
RE_COI_564	0	0	0	0	0	0	0	0	0	0	0	0	0	0	0	0	0	0	5	0	0	0	0	0	0	0	0	0	0	0	0	0	0	0	0	0	k__Metazoa; p__Mollusca; c__Cephalopoda; o__Octopoda; f__Octopodidae; g__Aphrodoctopus; s__Aphrodoctopus_schultzei
RE_COI_565	0	0	0	0	0	0	0	20	7	0	0	0	0	0	0	0	0	0	0	0	0	0	0	0	0	0	0	0	0	0	0	0	0	0	0	0	k__Metazoa; p__Mollusca; c__Gastropoda; o__Cycloneritida; f__Neritidae; g__Nerita; s__Nerita_atramentosa
RE_COI_566	0	0	0	0	0	0	0	11	23	0	0	0	0	0	0	0	0	0	0	0	0	0	0	0	0	0	0	0	0	0	0	0	0	0	0	0	k__Metazoa; p__Mollusca; c__Gastropoda; o__Nudibranchia; f__Chromodorididae; g__Ceratosoma; s__Ceratosoma_ingozi
RE_COI_567	3	2	0	0	0	0	0	0	0	0	0	0	0	0	0	0	0	0	0	0	0	0	0	0	0	0	0	0	0	0	0	0	0	0	0	0	k__Metazoa; p__Mollusca; c__Gastropoda; o__Nudibranchia; f__Chromodorididae; g__Chromodoris; s__Chromodoris_cf._roboi_RFJ-2012
RE_COI_568	2	7	0	0	0	8	0	0	0	0	0	0	0	0	0	0	0	0	0	0	0	0	0	0	0	0	0	0	0	0	0	0	0	0	0	0	k__Metazoa; p__Mollusca; c__Gastropoda; o__Nudibranchia; f__Discodorididae; g__Diaulula; s__Diaulula_greeleyi
RE_COI_569	10	12	8	0	0	0	0	6	5	0	0	0	0	0	0	0	0	0	0	0	0	0	0	0	0	0	0	0	0	0	0	0	0	0	0	0	k__Metazoa; p__Mollusca; c__Gastropoda; o__Nudibranchia; f__Discodorididae; g__Diaulula; s__Diaulula_greeleyi
RE_COI_570	0	0	0	0	0	0	0	0	0	1	0	1	0	0	0	0	0	0	0	0	0	0	0	0	0	0	0	0	0	0	0	0	0	0	0	0	k__Metazoa; p__Mollusca; c__Gastropoda; o__Nudibranchia; f__Facelinidae; g__Pteraeolidia; s__Pteraeolidia_ianthina
RE_COI_571	0	0	0	0	0	0	0	0	0	0	0	0	0	0	0	0	0	0	0	5	0	0	0	1	0	0	0	0	0	0	2	5	0	0	0	0	k__Metazoa; p__Mollusca; c__Gastropoda; o__Nudibranchia; f__Fionidae; g__Tergipes; s__Tergipes_tergipes
RE_COI_572	0	0	6	0	0	0	0	0	0	0	0	0	0	0	0	0	0	0	0	0	0	0	0	0	0	0	0	0	0	0	0	0	0	0	0	0	k__Metazoa; p__Mollusca; c__Gastropoda; o__Nudibranchia; f__Glaucidae; g__Phyllodesmium; s__Phyllodesmium_jakobsenae
RE_COI_573	1	0	4	0	0	0	0	0	0	0	0	0	0	0	0	0	0	0	0	0	0	0	0	0	0	0	0	0	0	0	0	0	0	0	0	0	k__Metazoa; p__Mollusca; c__Gastropoda; o__Nudibranchia; f__Goniodorididae; g__Trapania; s__Trapania_hispalensis
RE_COI_574	0	0	0	0	0	0	0	0	0	0	0	0	0	2	0	0	0	0	1	0	0	0	0	2	0	0	0	0	0	1	0	5	0	0	0	2	k__Metazoa; p__Mollusca; c__Gastropoda; o__Nudibranchia; f__Phyllidiidae; g__Reticulidia; s__Reticulidia_fungia
RE_COI_575	0	0	0	0	0	0	0	0	0	0	0	3	0	0	0	0	0	0	0	0	0	1	0	2	0	0	0	0	0	1	0	0	2	0	0	0	k__Metazoa; p__Mollusca; c__Gastropoda; o__Nudibranchia; f__Tethydidae; g__Tethys; s__Tethys_fimbria
RE_COI_576	0	0	0	0	0	0	0	0	2	228	0	1	0	0	0	0	0	0	0	0	0	0	0	0	0	0	0	0	0	0	0	0	0	0	0	0	k__Metazoa; p__Mollusca; c__Gastropoda; o__Stylommatophora; f__Helicidae; g__Arianta; s__Arianta_arbustorum
RE_COI_577	0	0	0	0	0	0	0	0	0	0	0	0	0	0	0	0	0	0	8	2	0	0	0	0	0	0	0	0	0	0	0	0	0	0	0	0	k__Metazoa; p__Mollusca; c__Gastropoda; o__Stylommatophora; f__Helicidae; g__Theba; s__Theba_andalusica
RE_COI_578	14	5	20	0	0	0	0	0	0	0	0	0	0	0	0	0	0	0	0	0	0	0	0	0	0	0	1	0	0	0	0	0	0	0	0	0	k__Metazoa; p__Mollusca; c__Gastropoda; o__Stylommatophora; f__Partulidae; g__Partula; s__Partula_otaheitana
RE_COI_579	0	0	0	0	0	0	0	0	0	0	0	0	0	0	0	0	0	0	0	0	0	1	0	0	0	0	17	0	0	1	0	0	0	0	0	3	k__Metazoa; p__Mollusca; c__Gastropoda; o__Stylommatophora; f__Rhytididae; g__Powelliphanta; s__Powelliphanta_gilliesi
RE_COI_580	0	0	0	0	0	0	0	0	0	0	0	1	4	0	0	0	0	0	0	0	0	0	0	0	0	0	0	0	0	0	0	0	0	0	0	0	k__Metazoa; p__Mollusca; c__Gastropoda; o__Stylommatophora; f__unidentified; g__Anthinus; s__Anthinus_albolabiatus
RE_COI_581	0	0	0	0	0	0	0	0	0	1	2	6	3	3	0	0	0	0	0	0	0	0	0	0	0	0	0	0	0	0	0	0	0	0	0	0	k__Metazoa; p__Mollusca; c__Gastropoda; o__unidentified; f__Acroloxidae; g__Gerstfeldtiancylus; s__Gerstfeldtiancylus_roepstorfi
RE_COI_582	0	0	3	0	0	0	0	0	0	0	0	0	0	0	0	0	0	0	0	0	0	0	0	0	0	0	0	0	0	0	0	0	0	0	0	0	k__Metazoa; p__Mollusca; c__Gastropoda; o__unidentified; f__Acteonidae; g__Acteon; s__Acteon_tornatilis
RE_COI_583	17	16	61	0	0	1	0	0	0	0	0	0	0	0	0	0	0	0	0	0	0	0	0	0	0	0	0	0	0	0	0	0	0	0	0	0	k__Metazoa; p__Mollusca; c__Gastropoda; o__unidentified; f__Aglajidae; g__Aglaja; s__Aglaja_felis
RE_COI_584	0	0	0	0	0	0	0	0	0	0	0	0	0	0	0	0	0	0	7	0	0	0	0	0	0	0	0	0	0	0	0	0	0	0	0	0	k__Metazoa; p__Mollusca; c__Gastropoda; o__unidentified; f__Aglajidae; g__Chelidonura; s__Chelidonura_berolina
RE_COI_585	0	0	0	0	0	0	0	0	0	0	0	0	0	0	0	0	0	0	1	1	0	34	18	18	0	0	0	0	0	0	1	0	0	0	0	0	k__Metazoa; p__Mollusca; c__Gastropoda; o__unidentified; f__Aglajidae; g__Chelidonura; s__Chelidonura_sandrana
RE_COI_586	1	0	0	0	0	0	0	6	0	0	0	0	0	0	0	0	0	0	0	0	0	0	0	8	0	0	0	0	0	0	0	0	0	0	0	0	k__Metazoa; p__Mollusca; c__Gastropoda; o__unidentified; f__Aglajidae; g__Philinopsis; s__Philinopsis_cyanea
RE_COI_587	0	0	2	0	0	0	0	0	0	0	0	1	0	0	0	0	0	0	0	0	0	0	0	0	0	0	0	0	0	0	0	0	0	0	0	0	k__Metazoa; p__Mollusca; c__Gastropoda; o__unidentified; f__Ancylidae; g__Burnupia; s__Burnupia_caffra
RE_COI_588	0	0	0	0	0	0	0	0	0	0	0	0	0	0	0	0	0	0	0	0	0	0	0	0	0	0	2	0	0	0	0	0	0	0	0	0	k__Metazoa; p__Mollusca; c__Gastropoda; o__unidentified; f__Ancylidae; g__Uncancylus; s__Uncancylus_sp._UMMZ300277
RE_COI_589	6	1	26	0	0	0	0	0	0	0	0	0	0	0	0	0	0	0	0	0	0	0	0	0	0	0	0	0	0	0	0	0	0	0	0	1	k__Metazoa; p__Mollusca; c__Gastropoda; o__unidentified; f__Bithyniidae; g__Parafossarulus; s__Parafossarulus_sp._SZ-2011
RE_COI_590	0	0	0	0	0	0	0	0	0	0	2	5	0	0	0	0	0	0	30	0	0	0	0	0	0	0	0	0	0	0	0	2	0	0	0	0	k__Metazoa; p__Mollusca; c__Gastropoda; o__unidentified; f__Boselliidae; g__Bosellia; s__Bosellia_mimetica
RE_COI_591	0	0	0	0	0	0	0	0	0	0	0	0	0	0	0	0	0	0	6	0	0	0	0	0	0	0	0	0	0	0	0	0	0	0	0	0	k__Metazoa; p__Mollusca; c__Gastropoda; o__unidentified; f__Cancellariidae; g__Admete; s__Admete_aethiopica
RE_COI_592	3	2	0	0	1	3	0	0	0	0	0	0	0	0	0	0	0	0	0	0	0	0	0	0	0	0	0	0	0	0	0	0	0	0	0	0	k__Metazoa; p__Mollusca; c__Gastropoda; o__unidentified; f__Cochliopidae; g__Heleobops; s__Heleobops_docimus
RE_COI_593	0	0	0	0	0	0	0	0	0	1	0	5	5	1	0	0	0	0	0	0	0	0	0	0	0	0	0	0	0	0	0	0	0	0	0	0	k__Metazoa; p__Mollusca; c__Gastropoda; o__unidentified; f__Conidae; g__Conus; s__Conus_victoriae
RE_COI_594	0	0	0	0	0	0	0	0	0	0	0	0	0	0	0	0	0	0	3	0	0	0	0	0	0	0	0	0	0	0	0	0	0	0	0	0	k__Metazoa; p__Mollusca; c__Gastropoda; o__unidentified; f__Conidae; g__Mitromorpha; s__Mitromorpha_metula
RE_COI_595	0	0	0	0	0	0	0	0	0	0	0	0	11	0	0	0	0	0	0	0	0	0	0	0	0	0	0	0	0	0	0	0	0	0	0	0	k__Metazoa; p__Mollusca; c__Gastropoda; o__unidentified; f__Diplommatinidae; g__Diplommatina; s__Diplommatina_sp._nov._AK_MS-2010
RE_COI_596	0	0	0	0	0	0	0	0	0	0	0	0	0	0	0	0	0	0	9	2	0	6	1	3	0	0	0	0	0	0	1	1	2	0	2	0	k__Metazoa; p__Mollusca; c__Gastropoda; o__unidentified; f__Drilliidae; g__unidentified; s__Drilliidae_sp._PJF-2016a
RE_COI_597	0	0	0	0	0	0	0	0	0	0	0	0	0	0	0	0	0	0	41	0	0	0	0	0	0	0	0	0	0	0	0	0	0	0	0	0	k__Metazoa; p__Mollusca; c__Gastropoda; o__unidentified; f__Ellobiidae; g__Carychium; s__Carychium_floridanum
RE_COI_598	0	0	0	0	0	0	0	0	0	0	0	0	0	0	0	0	0	0	0	0	0	3	0	0	0	0	0	0	0	0	0	0	0	0	0	0	k__Metazoa; p__Mollusca; c__Gastropoda; o__unidentified; f__Gastropteridae; g__Siphopteron; s__Siphopteron_quadrispinosum
RE_COI_599	0	0	0	0	0	0	0	0	0	0	0	0	0	0	0	0	0	0	2	0	0	0	0	0	0	0	0	0	0	0	0	0	0	0	0	0	k__Metazoa; p__Mollusca; c__Gastropoda; o__unidentified; f__Hipponicidae; g__Antisabia; s__Antisabia_foliacea
RE_COI_600	0	0	0	0	0	0	0	0	0	2	0	6	5	1	0	0	0	0	0	0	0	0	0	0	0	0	0	0	0	0	0	0	0	0	0	0	k__Metazoa; p__Mollusca; c__Gastropoda; o__unidentified; f__Lepetodrilidae; g__Lepetodrilus; s__Lepetodrilus_gordensis
RE_COI_601	0	0	0	0	0	0	0	0	0	0	1	1	0	1	0	0	0	0	3	0	0	0	0	0	0	0	0	0	0	0	0	0	0	0	0	0	k__Metazoa; p__Mollusca; c__Gastropoda; o__unidentified; f__Lepetodrilidae; g__Lepetodrilus; s__Lepetodrilus_sp._1_SBJ-2008
RE_COI_602	0	0	0	0	0	0	0	0	0	0	0	0	0	0	0	0	0	0	15	0	0	3	0	0	0	0	0	0	0	0	0	0	0	0	0	0	k__Metazoa; p__Mollusca; c__Gastropoda; o__unidentified; f__Limapontiidae; g__Ercolania; s__Ercolania_tentaculata
RE_COI_603	0	0	0	0	0	0	0	0	0	0	0	0	0	0	0	0	0	0	0	0	0	0	0	0	0	0	0	0	0	0	0	0	47	0	0	0	k__Metazoa; p__Mollusca; c__Gastropoda; o__unidentified; f__Lymnaeidae; g__Radix; s__Radix_sp._clade_3_PVVO-2011
RE_COI_604	0	0	0	0	0	0	0	0	0	0	0	0	0	0	0	0	0	0	4	0	0	0	0	0	0	0	0	0	0	0	0	0	0	0	0	0	k__Metazoa; p__Mollusca; c__Gastropoda; o__unidentified; f__Muricidae; g__Favartia; s__Favartia_mactanensis
RE_COI_605	4	2	0	0	0	0	0	0	0	0	0	0	0	0	0	0	0	0	18	2	0	7	8	8	0	0	0	0	0	0	0	0	0	0	0	0	k__Metazoa; p__Mollusca; c__Gastropoda; o__unidentified; f__Muricidae; g__Thaisella; s__Thaisella_chocolata
RE_COI_606	0	4	0	0	0	0	0	0	0	0	0	0	0	0	0	0	0	0	0	0	0	0	0	0	0	0	0	0	0	0	0	0	0	0	0	0	k__Metazoa; p__Mollusca; c__Gastropoda; o__unidentified; f__Muricidae; g__unidentified; s__Stramonita_biserialis
RE_COI_607	0	0	0	0	0	0	0	0	0	2	0	0	0	0	0	0	0	0	0	0	0	0	0	0	0	0	0	0	0	0	0	0	0	0	0	0	k__Metazoa; p__Mollusca; c__Gastropoda; o__unidentified; f__Philinidae; g__Philine; s__Philine_sp._BOLD:AAN7499
RE_COI_608	0	1	0	0	0	0	0	0	0	0	0	2	0	0	0	0	0	0	0	0	0	0	0	0	0	0	0	0	0	6	0	8	0	0	0	0	k__Metazoa; p__Mollusca; c__Gastropoda; o__unidentified; f__Physidae; g__Physella; s__Physella_acuta
RE_COI_609	0	0	0	0	0	0	0	0	0	3	3	1	1	0	0	0	0	0	3	0	0	0	0	0	0	0	0	0	0	0	0	0	0	0	0	0	k__Metazoa; p__Mollusca; c__Gastropoda; o__unidentified; f__Placobranchidae; g__Elysia; s__Elysia_cornigera
RE_COI_610	0	0	0	0	0	0	0	0	0	0	0	0	0	0	0	0	0	0	33	0	0	1	0	0	0	0	0	0	0	0	0	1	0	0	0	0	k__Metazoa; p__Mollusca; c__Gastropoda; o__unidentified; f__Placobranchidae; g__Elysia; s__Elysia_pusilla
RE_COI_611	1	1	8	0	0	0	0	0	0	0	0	0	0	0	0	0	0	0	0	0	0	0	0	0	0	0	0	0	0	0	0	0	0	0	0	0	k__Metazoa; p__Mollusca; c__Gastropoda; o__unidentified; f__Planorbidae; g__Armiger; s__Armiger_crista
RE_COI_612	2	5	21	0	0	0	0	0	1	0	0	0	0	0	0	0	0	0	0	0	0	0	0	0	0	0	0	0	0	0	0	0	0	0	0	0	k__Metazoa; p__Mollusca; c__Gastropoda; o__unidentified; f__Planorbidae; g__Bulinus; s__Bulinus_globosus
RE_COI_613	0	1	7	0	0	0	0	0	0	0	0	0	0	0	0	0	0	0	0	0	0	0	0	0	0	0	0	0	0	0	1	0	0	0	0	0	k__Metazoa; p__Mollusca; c__Gastropoda; o__unidentified; f__Planorbidae; g__Gyraulus; s__Gyraulus_sp._17086
RE_COI_614	0	0	0	0	0	0	0	0	0	0	1	0	0	0	0	0	0	0	12	1	0	0	0	0	0	0	0	0	0	0	0	0	0	0	0	0	k__Metazoa; p__Mollusca; c__Gastropoda; o__unidentified; f__Planorbidae; g__Gyraulus; s__Gyraulus_sp._17088
RE_COI_615	0	0	0	0	0	0	0	0	0	0	20	4	7	0	0	0	0	0	0	0	0	0	0	0	0	0	0	0	0	0	0	0	0	0	0	0	k__Metazoa; p__Mollusca; c__Gastropoda; o__unidentified; f__Pleuroceridae; g__Leptoxis; s__Leptoxis_taeniata
RE_COI_616	0	0	6	0	0	0	0	0	0	0	0	0	0	0	0	0	0	0	0	0	0	0	0	0	0	0	0	0	0	0	0	0	0	0	0	0	k__Metazoa; p__Mollusca; c__Gastropoda; o__unidentified; f__Pomatiopsidae; g__Oncomelania; s__Oncomelania_minima
RE_COI_617	0	0	0	0	0	0	0	0	0	0	0	0	0	0	0	0	0	0	31	1	0	0	0	0	0	0	0	0	0	0	0	0	0	0	0	0	k__Metazoa; p__Nematoda; c__Chromadorea; o__Diplogasterida; f__Diplogasteridae; g__Micoletzkya; s__Micoletzkya_sp._7_VS-2014
RE_COI_618	0	0	0	0	0	0	0	0	0	1	1	3	0	0	0	0	0	0	0	0	0	0	0	0	0	0	0	0	0	0	0	0	0	0	0	0	k__Metazoa; p__Nematoda; c__Chromadorea; o__Rhabditida; f__Molineidae; g__Oswaldocruzia; s__Oswaldocruzia_sp._sp._BOLD:AAY6341
RE_COI_619	0	0	0	0	0	0	0	0	0	0	0	0	0	0	0	0	0	0	2	0	0	0	0	0	0	0	0	0	0	0	0	0	0	0	0	2	k__Metazoa; p__Nematoda; c__Chromadorea; o__Rhabditida; f__Panagrolaimidae; g__Panagrolaimus; s__Panagrolaimus_paetzoldi
RE_COI_620	0	0	0	0	4	5	0	4	1	0	0	0	0	0	0	0	0	0	0	0	0	0	0	0	0	0	0	0	0	0	0	0	0	0	0	0	k__Metazoa; p__Nematoda; c__Chromadorea; o__Rhabditida; f__Strongylidae; g__unidentified; s__Cyathostominae_sp._M3
RE_COI_621	0	0	0	0	0	0	0	0	0	0	0	0	0	0	0	0	0	0	0	0	0	0	0	0	0	0	4	0	0	0	0	0	0	0	0	0	k__Metazoa; p__Nematoda; c__Chromadorea; o__Rhabditida; f__Strongyloididae; g__Strongyloides; s__Strongyloides_stercoralis
RE_COI_622	0	0	0	0	0	0	0	0	0	0	0	0	0	0	0	0	0	0	0	0	0	0	0	0	0	0	8	0	0	0	0	0	0	0	0	0	k__Metazoa; p__Nematoda; c__Chromadorea; o__Rhabditida; f__unidentified; g__unidentified; s__Rhabditida_sp._3028ed
RE_COI_623	0	0	0	0	0	0	0	0	1	0	0	0	0	0	0	0	0	0	0	0	0	0	0	1	0	0	4	0	1	0	0	0	0	0	0	0	k__Metazoa; p__Nematoda; c__Chromadorea; o__Rhabditida; f__unidentified; g__unidentified; s__Rhabditida_sp._3050ed
RE_COI_624	0	0	0	0	0	0	0	0	0	0	0	0	0	2	0	0	0	0	0	0	0	0	0	0	0	0	0	0	0	0	0	0	0	0	0	0	k__Metazoa; p__Nematoda; c__Chromadorea; o__Tylenchida; f__Aphelenchoididae; g__Bursaphelenchus; s__Bursaphelenchus_cocophilus
RE_COI_625	0	0	0	0	0	0	0	0	0	1	2	0	0	0	0	0	0	0	0	0	0	0	0	0	0	0	0	0	0	0	0	0	0	0	0	0	k__Metazoa; p__Nematoda; c__Chromadorea; o__Tylenchida; f__Aphelenchoididae; g__Bursaphelenchus; s__Bursaphelenchus_cocophilus
RE_COI_626	0	0	0	0	0	0	0	1	0	2	2	7	0	0	0	0	0	0	0	0	0	0	0	0	0	0	0	0	0	0	0	0	0	0	0	0	k__Metazoa; p__Nematoda; c__Chromadorea; o__Tylenchida; f__Aphelenchoididae; g__Bursaphelenchus; s__Bursaphelenchus_cocophilus
RE_COI_627	0	0	0	0	0	0	0	0	0	0	0	1	0	0	0	0	0	0	13	0	0	0	0	0	0	0	0	0	0	0	0	0	0	0	0	0	k__Metazoa; p__Nematoda; c__Chromadorea; o__Tylenchida; f__Aphelenchoididae; g__Bursaphelenchus; s__Bursaphelenchus_cocophilus
RE_COI_628	0	0	0	0	0	0	0	0	0	1	0	0	0	0	0	0	0	0	12	2	0	0	0	0	0	0	0	0	0	0	0	0	0	0	0	0	k__Metazoa; p__Nematoda; c__Chromadorea; o__Tylenchida; f__Aphelenchoididae; g__Bursaphelenchus; s__Bursaphelenchus_cocophilus
RE_COI_629	0	0	0	0	0	0	0	0	0	1	9	4	2	0	0	0	0	0	12	0	0	0	0	0	0	0	0	0	0	0	0	0	0	0	0	0	k__Metazoa; p__Nematoda; c__Chromadorea; o__Tylenchida; f__Aphelenchoididae; g__Bursaphelenchus; s__Bursaphelenchus_cocophilus
RE_COI_630	0	0	0	0	0	0	0	0	0	2	4	2	0	0	0	0	0	0	28	1	0	0	0	0	0	0	0	0	0	0	0	0	0	0	0	0	k__Metazoa; p__Nematoda; c__Chromadorea; o__Tylenchida; f__Aphelenchoididae; g__Bursaphelenchus; s__Bursaphelenchus_cocophilus
RE_COI_631	0	0	0	0	0	0	0	0	1	7	9	13	16	1	0	0	0	0	0	0	0	0	0	0	0	0	0	0	0	0	0	0	0	0	0	0	k__Metazoa; p__Nematoda; c__Chromadorea; o__Tylenchida; f__Aphelenchoididae; g__Bursaphelenchus; s__Bursaphelenchus_cocophilus
RE_COI_632	0	0	0	0	0	0	0	0	0	1	1	0	0	0	0	0	0	0	62	0	0	0	0	0	0	0	0	0	0	0	0	0	0	0	0	0	k__Metazoa; p__Nematoda; c__Chromadorea; o__Tylenchida; f__Aphelenchoididae; g__Bursaphelenchus; s__Bursaphelenchus_cocophilus
RE_COI_633	0	0	0	0	0	0	0	0	0	16	43	29	43	21	0	0	0	0	0	0	0	0	0	0	0	0	0	0	0	0	1	0	0	0	0	0	k__Metazoa; p__Nematoda; c__Chromadorea; o__Tylenchida; f__Aphelenchoididae; g__Bursaphelenchus; s__Bursaphelenchus_cocophilus
RE_COI_634	0	0	0	0	0	0	0	0	0	0	0	0	0	0	0	0	0	0	0	0	0	0	0	1	0	0	0	0	0	0	1	1	62	0	0	0	k__Metazoa; p__Nematoda; c__Chromadorea; o__Tylenchida; f__Meloidogynidae; g__Meloidogyne; s__Meloidogyne_graminicola
RE_COI_635	0	0	0	0	0	0	0	0	0	0	0	0	0	0	0	0	0	0	0	4	0	0	0	0	0	0	0	0	0	0	0	0	0	0	0	0	k__Metazoa; p__Nematoda; c__Chromadorea; o__Tylenchida; f__Neotylenchidae; g__Fergusobia; s__Fergusobia_sp._349
RE_COI_636	13	7	17	0	0	0	0	0	0	0	0	0	0	0	0	0	0	0	0	0	0	0	0	0	0	0	0	0	0	0	0	0	0	0	0	0	k__Metazoa; p__Nematoda; c__Chromadorea; o__Tylenchida; f__Neotylenchidae; g__Fergusobia; s__Fergusobia_sp._TLG_E._camaldulensis
RE_COI_637	0	0	0	0	0	0	0	6	8	0	0	0	0	0	0	0	0	0	0	0	0	0	0	0	0	0	0	0	0	0	0	0	0	0	0	0	k__Metazoa; p__Nematoda; c__Enoplea; o__Dorylaimida; f__Dorylaimidae; g__unidentified; s__Dorylaimidae_sp._N14_01
RE_COI_638	4	1	0	0	0	0	0	0	0	0	0	0	0	0	0	0	0	0	0	0	0	0	0	0	0	0	0	0	0	0	0	0	0	0	0	0	k__Metazoa; p__Nemertea; c__Anopla; o__Heteronemertea; f__Lineidae; g__Micrura; s__Micrura_purpurea
RE_COI_639	0	0	0	0	0	0	0	0	0	0	0	0	0	0	0	0	0	0	0	0	0	0	0	0	0	0	0	0	0	0	0	2	1	0	0	0	k__Metazoa; p__Nemertea; c__Enopla; o__Monostilifera; f__Ototyphlonemertidae; g__Ototyphlonemertes; s__Ototyphlonemertes_duplex
RE_COI_640	0	0	0	0	0	0	0	0	0	0	2	0	1	0	0	0	0	0	0	0	0	0	0	0	0	0	0	0	0	0	0	0	0	0	0	0	k__Metazoa; p__Nemertea; c__Palaeonemertea; o__unidentified; f__Cephalothricidae; g__Cephalothrix; s__Cephalothrix_sp._BMOO-08361
RE_COI_641	0	0	0	0	0	0	0	0	0	0	0	0	0	0	0	0	0	0	0	0	0	1	0	0	0	0	0	0	0	0	0	0	0	2	6	8	k__Metazoa; p__Placozoa; c__unidentified; o__unidentified; f__unidentified; g__unidentified; s__Placozoan_sp._BZ49
RE_COI_642	0	0	0	0	0	0	0	0	0	0	0	0	0	0	0	0	0	0	0	0	0	0	0	0	0	0	0	0	3	0	0	0	0	0	0	0	k__Metazoa; p__Platyhelminthes; c__Cestoda; o__Cyclophyllidea; f__Taeniidae; g__Taenia; s__Taenia_hydatigena
RE_COI_643	0	0	0	0	0	0	0	11	4	0	0	0	0	0	0	0	0	0	0	0	0	0	0	0	0	0	0	0	0	0	0	0	0	0	0	0	k__Metazoa; p__Platyhelminthes; c__Rhabditophora; o__Macrostomida; f__Macrostomidae; g__Macrostomum; s__Macrostomum_chongqingensis
RE_COI_644	0	0	0	0	0	0	0	6	6	2	0	0	0	0	0	0	0	0	0	0	0	0	0	0	0	0	0	2	0	0	0	0	1	0	0	0	k__Metazoa; p__Platyhelminthes; c__Rhabditophora;; o__Tricladida; f__Geoplanidae; g__Cephaloflexa; s__Cephaloflexa_bergi
RE_COI_645	0	0	0	0	0	0	0	0	0	0	0	0	0	0	0	0	0	0	0	0	0	0	0	0	0	0	0	0	0	1	0	1	1	2	1	2	k__Metazoa; p__Platyhelminthes; c__Rhabditophora;; o__Tricladida; f__Geoplanidae; g__Supramontana; s__Supramontana_irritata
RE_COI_646	0	0	0	0	3	0	0	0	0	0	0	0	0	0	0	0	0	0	0	0	0	0	0	0	0	0	0	0	0	0	0	0	0	0	0	0	k__Metazoa; p__Porifera; c__Demospongiae; o__Axinellida; f__Raspailiidae; g__Hymeraphia; s__Hymeraphia_verticillata
RE_COI_647	0	0	0	0	0	0	0	0	0	0	0	0	0	0	0	0	0	0	1	3	0	0	0	0	0	0	0	0	0	0	0	0	0	0	0	0	k__Metazoa; p__Porifera; c__Demospongiae; o__Axinellida; f__Raspailiidae; g__Raspailia; s__Raspailia_hispida
RE_COI_648	0	0	0	0	0	0	0	0	0	0	0	0	0	0	0	0	0	0	14	8	0	0	0	0	0	0	0	0	0	0	0	0	0	0	0	0	k__Metazoa; p__Porifera; c__Demospongiae; o__Biemnida; f__Biemnidae; g__Biemna; s__Biemna_fistulosa
RE_COI_649	0	0	0	0	3	0	0	0	0	0	0	0	0	0	0	0	0	0	0	0	0	0	0	0	0	0	0	0	0	0	0	0	0	0	0	0	k__Metazoa; p__Porifera; c__Demospongiae; o__Clionaida; f__Clionaidae; g__Cliona; s__Cliona_celata
RE_COI_650	0	0	0	0	0	0	0	0	0	0	6	0	0	0	0	0	0	0	0	0	0	0	0	0	0	0	0	0	0	0	0	0	0	0	0	0	k__Metazoa; p__Porifera; c__Demospongiae; o__Dendroceratida; f__Halisarcidae; g__Halisarca; s__Halisarca_sp._AA-2010
RE_COI_651	0	1	0	0	0	0	0	0	0	1	3	0	0	2	0	0	0	0	0	2	0	0	0	0	0	0	1	0	0	0	0	0	0	0	0	0	k__Metazoa; p__Porifera; c__Demospongiae; o__Dendroceratida; f__Halisarcidae; g__Halisarca; s__Halisarca_sp._AA-2010
RE_COI_652	0	0	0	0	0	0	0	0	0	0	1	1	2	1	0	0	0	0	0	1	0	0	1	0	0	0	0	0	0	0	0	0	0	0	0	0	k__Metazoa; p__Porifera; c__Demospongiae; o__Poecilosclerida; f__Desmacididae; g__Desmapsamma; s__Desmapsamma_anchorata
RE_COI_653	0	0	0	0	0	0	0	0	0	0	0	2	3	0	0	0	0	0	0	0	0	0	0	0	0	0	0	0	0	0	0	0	0	0	0	0	k__Metazoa; p__Porifera; c__Demospongiae; o__Polymastiida; f__Polymastiidae; g__Polymastia; s__Polymastia_uberrima
RE_COI_654	0	0	0	9	0	0	15	0	0	0	0	0	0	0	7	24	26	14	0	0	0	0	0	0	0	1	0	0	0	0	0	0	0	0	0	0	k__Metazoa; p__Porifera; c__Demospongiae; o__Spongillida; f__Spongillidae; g__Ephydatia; s__Ephydatia_fluviatilis
RE_COI_655	184	93	635	0	405	336	0	216	177	48	90	120	252	51	0	0	0	0	148	30	0	6	10	5	0	0	61	49	47	9	155	50	414	17	4	2	k__Metazoa; p__Porifera; c__Demospongiae; o__Spongillida; f__Spongillidae; g__Ephydatia; s__Ephydatia_fluviatilis
RE_COI_656	0	0	0	0	0	0	0	0	0	0	0	0	0	0	0	0	0	0	0	0	0	0	0	0	0	0	0	0	0	0	0	0	7	0	0	0	k__Metazoa; p__Porifera; c__Demospongiae; o__Verongiida; f__Aplysinidae; g__Aplysina; s__Aplysina_cauliformis
RE_COI_657	0	0	0	0	2	3	0	0	0	0	0	0	0	0	0	0	0	0	0	0	0	0	0	0	0	0	0	0	0	0	0	0	0	0	0	0	k__Metazoa; p__Porifera; c__Homoscleromorpha; o__Homosclerophorida; f__Plakinidae; g__Oscarella; s__Oscarella_malakhovi
RE_COI_658	0	0	0	0	4	2	0	0	0	0	0	0	0	0	0	0	0	0	0	0	0	0	0	0	0	0	0	0	0	0	0	0	0	0	0	0	k__Metazoa; p__Porifera; c__Homoscleromorpha; o__Homosclerophorida; f__Plakinidae; g__Oscarella; s__Oscarella_tuberculata
RE_COI_659	0	0	0	0	0	0	0	0	0	0	3	5	0	0	0	0	0	0	12	0	0	0	0	1	0	0	2	0	0	0	0	0	0	0	0	0	k__Metazoa; p__Tardigrada; c__Eutardigrada; o__Apochela; f__Milnesiidae; g__Milnesium; s__Milnesium_berladnicorum
RE_COI_660	0	0	0	0	0	0	0	0	0	0	0	0	0	0	0	0	0	0	0	0	0	0	0	0	0	0	0	0	0	0	0	0	0	8	0	0	k__Metazoa; p__Tardigrada; c__Eutardigrada; o__Parachela; f__Hypsibiidae; g__PseudobiS-OTUs; s__PseudobiS-OTUs_sp._SHR-2005
RE_COI_invertebrate_environmental_sample	0	0	0	0	0	0	0	0	0	0	2	0	0	0	0	0	0	0	0	0	0	0	0	0	0	0	0	0	0	0	0	0	0	0	0	0	k__Metazoa; p__unidentified; c__unidentified; o__unidentified; f__unidentified; g__unidentified; s__invertebrate_environmental_sample
RE_COI_invertebrate_environmental_sample	0	1	0	0	1	0	0	0	0	0	0	0	0	0	0	0	0	0	0	0	0	0	0	0	0	0	0	0	0	0	0	0	0	0	0	0	k__Metazoa; p__unidentified; c__unidentified; o__unidentified; f__unidentified; g__unidentified; s__invertebrate_environmental_sample
RE_COI_invertebrate_environmental_sample	0	0	0	0	0	0	0	0	0	0	0	0	0	0	0	0	0	0	0	0	0	0	0	0	0	0	0	0	0	0	0	2	0	1	0	0	k__Metazoa; p__unidentified; c__unidentified; o__unidentified; f__unidentified; g__unidentified; s__invertebrate_environmental_sample
RE_COI_invertebrate_environmental_sample	0	0	0	0	0	0	0	0	0	0	0	0	0	0	0	0	0	0	0	0	0	0	0	0	0	0	0	0	0	0	0	1	3	0	0	0	k__Metazoa; p__unidentified; c__unidentified; o__unidentified; f__unidentified; g__unidentified; s__invertebrate_environmental_sample
RE_COI_invertebrate_environmental_sample	0	0	0	0	0	1	0	0	0	0	0	0	0	0	0	0	0	0	2	0	0	0	0	0	0	0	0	0	0	0	0	1	0	0	0	0	k__Metazoa; p__unidentified; c__unidentified; o__unidentified; f__unidentified; g__unidentified; s__invertebrate_environmental_sample
RE_COI_invertebrate_environmental_sample	0	0	0	0	0	0	0	0	0	1	0	0	3	0	0	0	0	0	0	0	0	0	0	0	0	0	0	0	0	0	0	1	0	0	0	0	k__Metazoa; p__unidentified; c__unidentified; o__unidentified; f__unidentified; g__unidentified; s__invertebrate_environmental_sample
RE_COI_invertebrate_environmental_sample	0	0	0	0	0	0	0	0	0	0	4	1	0	0	0	0	0	0	0	0	0	0	0	0	0	0	0	0	0	0	0	0	0	0	0	0	k__Metazoa; p__unidentified; c__unidentified; o__unidentified; f__unidentified; g__unidentified; s__invertebrate_environmental_sample
RE_COI_invertebrate_environmental_sample	0	0	3	0	0	0	0	0	0	0	0	0	0	0	0	0	0	0	0	0	0	0	0	0	0	0	0	0	0	0	2	0	0	0	0	0	k__Metazoa; p__unidentified; c__unidentified; o__unidentified; f__unidentified; g__unidentified; s__invertebrate_environmental_sample
RE_COI_invertebrate_environmental_sample	0	0	0	0	0	0	0	0	0	0	0	0	1	0	0	0	0	0	3	0	0	0	0	0	0	0	0	0	0	1	0	0	1	0	0	0	k__Metazoa; p__unidentified; c__unidentified; o__unidentified; f__unidentified; g__unidentified; s__invertebrate_environmental_sample
RE_COI_invertebrate_environmental_sample	2	1	2	0	0	0	0	1	0	0	0	0	0	0	0	0	0	0	0	0	0	0	0	0	0	0	0	0	0	0	0	0	0	0	0	0	k__Metazoa; p__unidentified; c__unidentified; o__unidentified; f__unidentified; g__unidentified; s__invertebrate_environmental_sample
RE_COI_invertebrate_environmental_sample	1	0	5	0	0	0	0	0	0	0	0	0	0	0	0	0	0	0	0	0	0	0	0	0	0	0	0	0	0	0	0	0	0	0	0	0	k__Metazoa; p__unidentified; c__unidentified; o__unidentified; f__unidentified; g__unidentified; s__invertebrate_environmental_sample
RE_COI_invertebrate_environmental_sample	0	0	6	0	0	0	0	0	0	0	0	0	0	0	0	0	0	0	0	0	0	0	0	0	0	0	0	0	0	0	0	0	0	0	0	0	k__Metazoa; p__unidentified; c__unidentified; o__unidentified; f__unidentified; g__unidentified; s__invertebrate_environmental_sample
RE_COI_invertebrate_environmental_sample	0	0	0	0	0	0	0	0	0	3	3	1	0	0	0	0	0	0	0	0	0	0	0	0	0	0	0	0	0	0	0	0	0	0	0	0	k__Metazoa; p__unidentified; c__unidentified; o__unidentified; f__unidentified; g__unidentified; s__invertebrate_environmental_sample
RE_COI_invertebrate_environmental_sample	0	1	1	0	0	0	0	1	0	0	1	0	1	0	0	0	0	0	1	0	0	0	0	0	0	0	0	0	0	0	0	2	0	0	0	0	k__Metazoa; p__unidentified; c__unidentified; o__unidentified; f__unidentified; g__unidentified; s__invertebrate_environmental_sample
RE_COI_invertebrate_environmental_sample	0	0	0	0	0	0	0	0	0	0	0	0	0	0	0	0	0	0	0	0	0	0	0	0	0	0	0	0	0	0	1	2	5	0	0	0	k__Metazoa; p__unidentified; c__unidentified; o__unidentified; f__unidentified; g__unidentified; s__invertebrate_environmental_sample
RE_COI_invertebrate_environmental_sample	1	1	0	0	3	0	0	0	3	0	0	0	0	0	0	0	0	0	0	0	0	0	0	0	0	0	0	0	0	0	0	0	0	0	0	0	k__Metazoa; p__unidentified; c__unidentified; o__unidentified; f__unidentified; g__unidentified; s__invertebrate_environmental_sample
RE_COI_invertebrate_environmental_sample	1	0	9	0	0	1	0	0	0	0	0	0	0	0	0	0	0	0	0	0	0	0	0	0	0	0	0	0	0	0	0	0	0	0	0	0	k__Metazoa; p__unidentified; c__unidentified; o__unidentified; f__unidentified; g__unidentified; s__invertebrate_environmental_sample
RE_COI_invertebrate_environmental_sample	0	1	0	0	0	0	0	0	0	0	0	0	0	0	0	0	0	0	9	1	0	0	0	0	0	0	0	0	0	0	0	1	0	0	0	0	k__Metazoa; p__unidentified; c__unidentified; o__unidentified; f__unidentified; g__unidentified; s__invertebrate_environmental_sample
RE_COI_invertebrate_environmental_sample	0	0	0	0	2	12	0	0	0	0	0	0	0	0	0	0	0	0	0	0	0	0	0	0	0	0	0	0	0	0	0	0	0	0	0	0	k__Metazoa; p__unidentified; c__unidentified; o__unidentified; f__unidentified; g__unidentified; s__invertebrate_environmental_sample
RE_COI_invertebrate_environmental_sample	0	0	0	0	0	0	0	0	0	0	0	3	0	0	0	0	0	0	0	0	0	0	0	0	0	0	0	0	0	0	1	2	9	0	0	0	k__Metazoa; p__unidentified; c__unidentified; o__unidentified; f__unidentified; g__unidentified; s__invertebrate_environmental_sample
RE_COI_invertebrate_environmental_sample	0	0	0	0	0	0	0	0	0	0	0	1	3	1	0	0	0	0	11	0	0	0	0	0	0	0	0	0	0	0	0	0	0	0	0	0	k__Metazoa; p__unidentified; c__unidentified; o__unidentified; f__unidentified; g__unidentified; s__invertebrate_environmental_sample
RE_COI_invertebrate_environmental_sample	0	0	6	0	6	0	0	0	0	0	0	1	0	0	0	0	0	0	3	0	0	0	0	0	0	0	0	0	0	0	0	0	0	0	0	1	k__Metazoa; p__unidentified; c__unidentified; o__unidentified; f__unidentified; g__unidentified; s__invertebrate_environmental_sample
RE_COI_invertebrate_environmental_sample	0	0	0	0	0	0	0	0	0	3	5	5	2	2	0	0	0	0	2	0	0	0	0	0	0	0	0	0	0	0	0	0	0	0	0	0	k__Metazoa; p__unidentified; c__unidentified; o__unidentified; f__unidentified; g__unidentified; s__invertebrate_environmental_sample
RE_COI_invertebrate_environmental_sample	0	0	3	0	4	4	0	2	4	0	0	0	0	0	0	0	0	0	0	0	0	0	0	0	0	0	0	0	0	0	3	0	0	0	0	0	k__Metazoa; p__unidentified; c__unidentified; o__unidentified; f__unidentified; g__unidentified; s__invertebrate_environmental_sample
RE_COI_invertebrate_environmental_sample	2	0	0	0	0	0	0	0	0	0	0	1	0	0	0	0	0	0	17	0	0	0	0	0	0	0	0	0	0	1	0	1	0	0	0	1	k__Metazoa; p__unidentified; c__unidentified; o__unidentified; f__unidentified; g__unidentified; s__invertebrate_environmental_sample
RE_COI_invertebrate_environmental_sample	2	0	0	0	0	1	0	2	0	0	3	1	4	1	0	0	0	0	9	1	0	0	0	1	0	0	0	0	0	0	0	3	0	0	0	0	k__Metazoa; p__unidentified; c__unidentified; o__unidentified; f__unidentified; g__unidentified; s__invertebrate_environmental_sample
RE_COI_invertebrate_environmental_sample	0	0	0	0	0	0	0	0	1	9	7	7	2	1	0	0	0	0	2	0	0	0	0	0	0	0	0	0	0	0	0	0	0	0	0	0	k__Metazoa; p__unidentified; c__unidentified; o__unidentified; f__unidentified; g__unidentified; s__invertebrate_environmental_sample
RE_COI_invertebrate_environmental_sample	1	1	1	0	5	4	0	2	0	0	0	0	0	0	0	0	0	0	10	0	0	0	0	0	0	0	1	0	0	0	1	4	0	0	0	0	k__Metazoa; p__unidentified; c__unidentified; o__unidentified; f__unidentified; g__unidentified; s__invertebrate_environmental_sample
RE_COI_invertebrate_environmental_sample	1	0	0	0	0	0	0	0	0	0	1	2	0	2	0	0	0	0	10	0	0	0	0	0	0	0	2	0	0	0	1	15	10	0	0	0	k__Metazoa; p__unidentified; c__unidentified; o__unidentified; f__unidentified; g__unidentified; s__invertebrate_environmental_sample
RE_COI_invertebrate_environmental_sample	5	0	0	0	0	0	0	0	0	0	0	0	0	0	0	0	0	0	20	1	0	2	1	0	0	0	3	0	0	1	2	9	4	0	0	0	k__Metazoa; p__unidentified; c__unidentified; o__unidentified; f__unidentified; g__unidentified; s__invertebrate_environmental_sample
RE_COI_invertebrate_environmental_sample	0	0	1	0	0	0	0	2	2	0	0	0	0	0	0	0	0	0	0	0	0	0	1	0	0	0	59	0	0	0	0	0	0	0	0	1	k__Metazoa; p__unidentified; c__unidentified; o__unidentified; f__unidentified; g__unidentified; s__invertebrate_environmental_sample
RE_COI_invertebrate_environmental_sample	0	0	0	0	0	0	0	0	0	0	0	0	0	1	0	0	0	0	22	1	0	0	0	4	0	0	4	0	0	0	6	25	7	0	0	0	k__Metazoa; p__unidentified; c__unidentified; o__unidentified; f__unidentified; g__unidentified; s__invertebrate_environmental_sample
RE_COI_invertebrate_environmental_sample	0	0	0	0	0	0	0	0	0	0	0	0	0	0	0	0	0	0	0	0	0	0	0	0	0	0	0	5	4	8	11	21	23	0	0	2	k__Metazoa; p__unidentified; c__unidentified; o__unidentified; f__unidentified; g__unidentified; s__invertebrate_environmental_sample
RE_COI_invertebrate_environmental_sample	7	5	31	0	1	5	0	25	21	0	4	1	0	0	0	0	0	0	1	0	0	0	0	0	0	0	0	1	0	3	1	1	0	2	0	1	k__Metazoa; p__unidentified; c__unidentified; o__unidentified; f__unidentified; g__unidentified; s__invertebrate_environmental_sample
RE_COI_invertebrate_environmental_sample	1	3	11	0	0	0	0	0	0	0	0	0	0	0	0	0	0	0	17	0	0	0	0	0	0	0	62	0	1	1	4	28	70	1	0	0	k__Metazoa; p__unidentified; c__unidentified; o__unidentified; f__unidentified; g__unidentified; s__invertebrate_environmental_sample
RE_COI_invertebrate_environmental_sample	0	0	0	0	1	0	0	0	0	0	0	0	0	0	0	0	0	0	1	0	0	0	0	0	0	0	1	5	5	6	35	37	196	4	4	3	k__Metazoa; p__unidentified; c__unidentified; o__unidentified; f__unidentified; g__unidentified; s__invertebrate_environmental_sample
RE_COI_invertebrate_environmental_sample	42	16	25	0	26	17	0	5	0	506	263	491	36	7	0	0	0	0	0	0	0	0	0	0	0	0	0	0	0	0	4	0	27	0	1	0	k__Metazoa; p__unidentified; c__unidentified; o__unidentified; f__unidentified; g__unidentified; s__invertebrate_environmental_sample
RE_COI_invertebrate_environmental_sample	25	17	144	0	147	171	0	505	384	5	0	1	0	0	0	0	0	0	8	2	0	0	0	0	0	0	0	5	4	0	8	26	31	2	0	2	k__Metazoa; p__unidentified; c__unidentified; o__unidentified; f__unidentified; g__unidentified; s__invertebrate_environmental_sample
RE_COI_Arthropoda_environmental_sample	0	0	0	0	0	0	0	0	0	0	0	0	0	0	0	0	0	0	0	0	0	0	0	0	0	0	0	0	0	0	1	10	1	0	0	0	k__Metazoa; p__Arthropoda; c__unidentified; o__unidentified; f__unidentified; g__unidentified; s__Arthropoda_environmental_sample
RE_COI_Arthropoda_environmental_sample	1	1	6	0	0	0	0	2	0	47	139	171	27	15	0	0	0	0	6	11	0	136	36	57	0	0	0	0	0	0	0	0	0	0	0	0	k__Metazoa; p__Arthropoda; c__unidentified; o__unidentified; f__unidentified; g__unidentified; s__Arthropoda_environmental_sample
RE_COI_Arthropoda_environmental_sample	0	1	0	0	0	0	0	1	0	81	267	239	86	21	0	0	0	0	1	4	0	64	25	27	0	0	0	0	0	0	0	0	0	0	0	0	k__Metazoa; p__Arthropoda; c__unidentified; o__unidentified; f__unidentified; g__unidentified; s__Arthropoda_environmental_sample
RE_COI_Arthropoda_environmental_sample	21	67	56	0	80	79	0	129	96	17	6	1	2	1	0	0	0	0	609	54	0	129	1384	827	0	0	10105	940	1698	1136	4334	6840	8370	1638	92	218	k__Metazoa; p__Arthropoda; c__unidentified; o__unidentified; f__unidentified; g__unidentified; s__Arthropoda_environmental_sample
RE_COI_Arthropoda_environmental_sample	0	1	4	0	0	0	0	0	0	0	0	0	0	0	0	0	0	0	0	0	0	0	0	0	0	0	0	0	0	0	0	0	0	0	0	0	k__Metazoa; p__Arthropoda; c__unidentified; o__unidentified; f__unidentified; g__unidentified; s__Crustacea_environmental_sample
RE_COI_Arthropoda_environmental_sample	0	0	0	0	0	0	0	0	0	0	0	0	0	0	0	0	0	0	0	0	0	0	0	0	0	0	0	0	0	0	0	2	6	0	0	0	k__Metazoa; p__Arthropoda; c__unidentified; o__unidentified; f__unidentified; g__unidentified; s__Crustacea_environmental_sample
